# Supplementary material
Source: PubMed Central journal article supplement (PMC6365681)
Supplement: NIHMS1510361-supplement-supp_table_2.pdf [file NIHMS1510361-supplement-supp_table_2.pdf]

**Supplementary Table 2.** Genetic correlations between different AUDIT thresholds and DSM-IV alcohol dependence in the PGC cohort

| Audit Threshold (N) | Case Threshold (N) | rG            | SE    | p-value                      |
|---------------------|--------------------|---------------|-------|------------------------------|
| 2<br>(35 085)       | 8<br>(25 423)      | 0.482         | 0.122 | <b>7.6 x 10<sup>-5</sup></b> |
|                     | 10<br>(15 151)     | 0.474         | 0.134 | <b>4.0 x 10<sup>-4</sup></b> |
|                     | 12<br>(9130)       | 0.599         | 0.155 | <b>1.2 x 10<sup>-4</sup></b> |
|                     | 15<br>(4471)       | 0.577         | 0.16  | <b>3.1 x 10<sup>-4</sup></b> |
|                     | 18<br>(2099)       | 0.631         | 0.209 | <b>2.5 x 10<sup>-3</sup></b> |
|                     | 20<br>(1290)       | 0.737         | 0.22  | <b>8.3 x 10<sup>-4</sup></b> |
|                     | 3<br>(51 624)      | 8<br>(25 423) | 0.636 | 0.133                        |
| 10<br>(15 151)      |                    | 0.616         | 0.142 | <b>1.4 x 10<sup>-5</sup></b> |
| 12<br>(9130)        |                    | 0.738         | 0.163 | <b>5.8 x 10<sup>-6</sup></b> |
| 15<br>(4471)        |                    | 0.713         | 0.171 | <b>3.1 x 10<sup>-5</sup></b> |
| 18<br>(2099)        |                    | 0.756         | 0.224 | <b>7.3 x 10<sup>-4</sup></b> |
| 20<br>(1290)        |                    | 0.858         | 0.238 | <b>3.2 x 10<sup>-4</sup></b> |
| 4<br>(69 353)       |                    | 8<br>(25 423) | 0.726 | 0.142                        |
|                     | 10<br>(15 151)     | 0.689         | 0.149 | <b>3.6 x 10<sup>-6</sup></b> |
|                     | 12<br>(9130)       | 0.816         | 0.175 | <b>3.2 x 10<sup>-6</sup></b> |
|                     | 15<br>(4471)       | 0.767         | 0.182 | <b>3.2 x 10<sup>-5</sup></b> |
|                     | 18<br>(2099)       | 0.799         | 0.233 | <b>6.1 x 10<sup>-4</sup></b> |
|                     | 20<br>(1290)       | 0.897         | 0.248 | <b>3.0 x 10<sup>-4</sup></b> |

The threshold for statistical significance is  $p < 0.00278$  (0.05/18). Statistically significant genetic correlations are highlighted in bold.
