# Supplementary material
Source: PubMed Central journal article supplement (PMC6365681)
Supplement: NIHMS1510361-supplement-Supp_table_4.pdf [file NIHMS1510361-supplement-Supp_table_4.pdf]

Supplementary Table 4. Genetic correlations between AUDIT-C and other relevant traits using LDSC (traits with FDR < 0.05 are highlighted in bold)

| Trait                     | Sample S | Pubmed ID                                                                   | Genetic correlation (r <sub>g</sub> ) | Standard error | Zscore  | Pvalue    | FDR < 0.05 | h2_obs | h2_obs_se | h2_int | h2_int_se | gcov_int | gcov_int_se |
|---------------------------|----------|-----------------------------------------------------------------------------|---------------------------------------|----------------|---------|-----------|------------|--------|-----------|--------|-----------|----------|-------------|
| AUDIT Total UKB 23andMe   | 141958   | Current ms                                                                  | 0.983                                 | 0.005          | 213.320 | 0.00E+00  | Yes        | 0.085  | 0.005     | 0.997  | 0.007     | 0.991    | 0.007       |
| Alcohol Consumption UKBB  | 112117   | 28937603                                                                    | 0.921                                 | 0.034          | 27.282  | 6.95E-164 | Yes        | 0.081  | 0.006     | 1.011  | 0.008     | 0.176    | 0.005       |
| AUDIT Problematic UKBB    | 141958   | Current ms                                                                  | 0.695                                 | 0.039          | 17.701  | 4.11E-70  | Yes        | 0.059  | 0.005     | 1.006  | 0.006     | 0.379    | 0.006       |
| Alcohol Consumption       | 70460    | 27911795                                                                    | 0.788                                 | 0.111          | 7.113   | 1.13E-12  | Yes        | 0.049  | 0.012     | 1.010  | 0.011     | -0.006   | 0.008       |
| Years of Education        | 293723   | 27225129                                                                    | 0.196                                 | 0.030          | 6.551   | 5.70E-11  | Yes        | 0.126  | 0.005     | 0.928  | 0.010     | 0.024    | 0.006       |
| AUDIT 23andMe             | 20328    | 29058377                                                                    | 0.761                                 | 0.117          | 6.508   | 7.59E-11  | Yes        | 0.088  | 0.026     | 1.004  | 0.007     | 0.007    | 0.005       |
| College attainment        | 95427    | 2372424                                                                     | 0.241                                 | 0.049          | 4.937   | 7.93E-07  | Yes        | 0.105  | 0.008     | 1.021  | 0.009     | 0.007    | 0.006       |
| Obesity                   | 98697    | 23563607                                                                    | -0.168                                | 0.038          | -4.449  | 8.61E-06  | Yes        | 0.171  | 0.010     | 0.798  | 0.009     | 0.003    | 0.006       |
| Cognitive performance     | 106736   | 25201988                                                                    | 0.212                                 | 0.049          | 4.325   | 1.53E-05  | Yes        | 0.107  | 0.007     | 1.027  | 0.009     | 0.009    | 0.006       |
| Smoking Lifetime Use      | 74035    | 20418890                                                                    | 0.240                                 | 0.056          | 4.318   | 1.57E-05  | Yes        | 0.074  | 0.007     | 0.968  | 0.006     | 0.005    | 0.005       |
| Depressive Symptoms       | 161460   | 27089181                                                                    | -0.192                                | 0.048          | -4.030  | 5.57E-05  | Yes        | 0.047  | 0.004     | 1.000  | 0.008     | -0.014   | 0.006       |
| Alcohol Dependence PGC    | 52848    | bioRxiv                                                                     | 0.332                                 | 0.084          | 3.938   | 8.22E-05  | Yes        | 0.058  | 0.012     | 1.018  | 0.006     | 0.003    | 0.005       |
| Cannabis Lifetime Use     | 32330    | 27023175                                                                    | 0.256                                 | 0.066          | 3.861   | 1.13E-04  | Yes        | 0.090  | 0.017     | 0.999  | 0.007     | 0.004    | 0.005       |
| HDL cholesterol           | 100164   | 20686565                                                                    | 0.186                                 | 0.048          | 3.907   | 9.33E-05  | Yes        | 0.128  | 0.023     | 1.057  | 0.049     | 0.012    | 0.006       |
| Triglycerides             | 96598    | 20686565                                                                    | -0.164                                | 0.043          | -3.855  | 1.00E-04  | Yes        | 0.168  | 0.029     | 0.968  | 0.017     | -0.002   | 0.006       |
| Neuroticism               | 106716   | 27087015                                                                    | -0.132                                | 0.037          | -3.559  | 3.72E-04  | Yes        | 0.125  | 0.011     | 0.992  | 0.011     | -0.011   | 0.005       |
| Major Depressive Disorder | 18759    | 22472876                                                                    | -0.235                                | 0.081          | -2.900  | 3.73E-03  | Yes        | 0.155  | 0.029     | 1.013  | 0.008     | 0.003    | 0.006       |
| ADHD PGC                  | 53293    | <a href="https://doi.org/10.1101/145581">https://doi.org/10.1101/145581</a> | -0.104                                | 0.044          | -2.372  | 1.77E-02  | Yes        | 0.235  | 0.015     | 1.036  | 0.010     | -0.005   | 0.006       |
| Height                    | 253288   | 25282103                                                                    | 0.056                                 | 0.024          | 2.328   | 1.99E-02  | Yes        | 0.342  | 0.018     | 1.231  | 0.032     | -0.005   | 0.008       |
| Intracranial brain volume | 13171    | 25607358                                                                    | 0.193                                 | 0.085          | 2.263   | 2.36E-02  | No         | 0.176  | 0.045     | 1.002  | 0.007     | 0.005    | 0.005       |
| Caudate Volume            | 13171    | 25607358                                                                    | 0.141                                 | 0.068          | 2.064   | 3.90E-02  | No         | 0.248  | 0.038     | 0.969  | 0.006     | -0.010   | 0.005       |
| Alcohol dependence        | 7280     | 24169409                                                                    | 0.409                                 | 0.200          | 2.045   | 4.09E-02  | No         | 0.087  | 0.065     | 1.048  | 0.007     | -0.005   | 0.005       |
| BMI                       | 339224   | 25673413                                                                    | -0.105                                | 0.053          | -1.999  | 4.56E-02  | No         | 0.605  | 0.047     | 0.994  | 0.010     | 0.011    | 0.007       |
| Neuroticism               | 170911   | 27089181                                                                    | -0.090                                | 0.042          | -2.138  | 3.25E-02  | No         | 0.090  | 0.008     | 0.987  | 0.013     | -0.013   | 0.006       |
| Childhood Obesity         | 13848    | 22484627                                                                    | -0.098                                | 0.051          | -1.924  | 5.44E-02  | No         | 0.415  | 0.046     | 0.922  | 0.008     | 0.002    | 0.004       |
| Bipolar Disorder          | 18731    | 21928972                                                                    | 0.100                                 | 0.065          | 1.528   | 1.27E-01  | No         | 0.509  | 0.051     | 1.003  | 0.009     | -0.003   | 0.008       |
| Childhood IQ              | 12441    | 23358166                                                                    | 0.114                                 | 0.072          | 1.584   | 1.13E-01  | No         | 0.273  | 0.044     | 1.002  | 0.009     | 0.005    | 0.006       |
| Loneliness                | 10780    | 27629369                                                                    | 0.181                                 | 0.153          | 1.186   | 2.38E-01  | No         | 0.153  | 0.092     | 1.004  | 0.007     | -0.011   | 0.005       |
| Anorexia Nervosa          | 17767    | 24514567                                                                    | 0.052                                 | 0.073          | 0.713   | 4.76E-01  | No         | 0.190  | 0.031     | 1.011  | 0.008     | -0.006   | 0.006       |
| Subjective Wellbeing      | 298420   | 27089181                                                                    | -0.034                                | 0.051          | -0.662  | 5.08E-01  | No         | 0.025  | 0.002     | 1.000  | 0.007     | 0.014    | 0.006       |
| Extraversion              | 63,030   | 26362575                                                                    | -0.055                                | 0.073          | -0.747  | 4.55E-01  | No         | 0.020  | 0.003     | 1.002  | 0.007     | 0.011    | 0.005       |
| Nucleus Accumbens Volume  | 13171    | 25607358                                                                    | 0.051                                 | 0.090          | 0.570   | 5.69E-01  | No         | 0.090  | 0.037     | 0.979  | 0.007     | 0.000    | 0.004       |
| Smoking Age Onset         | 47961    | 20418890                                                                    | 0.043                                 | 0.105          | 0.405   | 6.85E-01  | No         | 0.030  | 0.009     | 1.000  | 0.006     | 0.002    | 0.005       |
| Daily cigarettes          | 68028    | 20418890                                                                    | 0.041                                 | 0.090          | 0.453   | 6.50E-01  | No         | 0.032  | 0.009     | 1.007  | 0.007     | -0.006   | 0.005       |
| Total Cholesterol         | 99900    | 20686565                                                                    | 0.017                                 | 0.040          | 0.426   | 6.70E-01  | No         | 0.133  | 0.024     | 1.022  | 0.036     | -0.006   | 0.006       |
| Former smoker             | 70675    | 20418890                                                                    | -0.016                                | 0.075          | -0.209  | 8.35E-01  | No         | 0.036  | 0.006     | 1.001  | 0.006     | -0.001   | 0.005       |
| LDL cholesterol           | 95454    | 20686565                                                                    | -0.009                                | 0.044          | -0.204  | 8.38E-01  | No         | 0.103  | 0.029     | 1.052  | 0.050     | -0.012   | 0.006       |
| Schizophrenia             | 77096    | 25056061                                                                    | 0.000                                 | 0.029          | -0.012  | 9.91E-01  | No         | 0.473  | 0.019     | 1.038  | 0.013     | -0.006   | 0.007       |
| Hippocampus Volume        | 13171    | 25607358                                                                    | -0.010                                | 0.090          | -0.140  | 8.89E-01  | No         | 0.141  | 0.040     | 0.988  | 0.007     | 0.000    | 0.005       |
