# Supplementary material
Source: PubMed Central journal article supplement (PMC6365681)
Supplement: NIHMS1510361-supplement-supp_table_5.pdf [file NIHMS1510361-supplement-supp_table_5.pdf]

Supplementary Table 5. Genetic correlations between AUDIT-P and other relevant traits using LDSC (traits with FDR < 0.05 are highlighted in bold)

| Trait                     | Sample | SI | Pubmed ID                                                                   | Genetic correlation ( $r_g$ ) | Standard error | Zscore | Pvalue    | FDR < 0.05 | $h^2_{obs}$ | $h^2_{obs\_se}$ | $h^2_{int}$ | $h^2_{int\_se}$ | gcov_int | gcov_int_se |
|---------------------------|--------|----|-----------------------------------------------------------------------------|-------------------------------|----------------|--------|-----------|------------|-------------|-----------------|-------------|-----------------|----------|-------------|
| AUDIT Total UKB 23andMe   | 141958 |    | Current ms                                                                  | 0.805                         | 0.029          | 28.191 | 7.60E-175 | Yes        | 0.059       | 0.005           | 1.006       | 0.007           | 0.550    | 0.006       |
| AUDIT Consumption UKBB    | 141958 |    | Current ms                                                                  | 0.895                         | 0.039          | 17.701 | 4.11E-70  | Yes        | 0.059       | 0.005           | 1.006       | 0.006           | 0.379    | 0.006       |
| Alcohol Consumption UKBB  | 112117 |    | 28937693                                                                    | 0.781                         | 0.050          | 15.218 | 2.67E-52  | Yes        | 0.081       | 0.006           | 1.011       | 0.008           | 0.089    | 0.005       |
| Smoking Lifetime Use      | 74035  |    | 20418890                                                                    | 0.407                         | 0.064          | 6.353  | 1.73E-10  | Yes        | 0.074       | 0.007           | 0.998       | 0.006           | 0.006    | 0.005       |
| Schizophrenia             | 77096  |    | 25056061                                                                    | 0.222                         | 0.035          | 6.299  | 3.00E-10  | Yes        | 0.473       | 0.019           | 1.038       | 0.013           | -0.005   | 0.007       |
| Alcohol Consumption       | 70460  |    | 27911795                                                                    | 0.784                         | 0.128          | 5.977  | 2.28E-09  | Yes        | 0.049       | 0.012           | 1.010       | 0.011           | -0.001   | 0.008       |
| Alcohol Dependence PGC    | 52848  |    | bioRxiv                                                                     | 0.630                         | 0.112          | 5.631  | 1.79E-08  | Yes        | 0.058       | 0.012           | 1.018       | 0.006           | 0.006    | 0.005       |
| Depressive Symptoms       | 161460 |    | 27089181                                                                    | 0.303                         | 0.055          | 5.543  | 2.98E-08  | Yes        | 0.047       | 0.004           | 1.000       | 0.008           | 0.017    | 0.005       |
| Cannabis Lifetime Use     | 32330  |    | 27023175                                                                    | 0.460                         | 0.085          | 5.397  | 6.77E-08  | Yes        | 0.090       | 0.017           | 0.999       | 0.007           | -0.001   | 0.005       |
| AUDIT 23andMe             | 20328  |    | 29058377                                                                    | 0.639                         | 0.133          | 4.801  | 1.58E-06  | Yes        | 0.088       | 0.026           | 1.004       | 0.007           | -0.001   | 0.005       |
| ADHD2 PGC                 | 53293  |    | <a href="https://doi.org/10.1101/145581">https://doi.org/10.1101/145581</a> | 0.227                         | 0.053          | 4.403  | 1.07E-05  | Yes        | 0.235       | 0.015           | 1.036       | 0.010           | -0.009   | 0.007       |
| Neuroticism               | 170911 |    | 27089181                                                                    | 0.227                         | 0.052          | 4.353  | 1.34E-05  | Yes        | 0.090       | 0.008           | 0.987       | 0.013           | 0.025    | 0.006       |
| Subjective Wellbeing      | 298420 |    | 27089181                                                                    | -0.240                        | 0.058          | -4.109 | 3.98E-05  | Yes        | 0.025       | 0.002           | 1.000       | 0.007           | -0.012   | 0.006       |
| Bipolar Disorder          | 16731  |    | 21926972                                                                    | 0.261                         | 0.069          | 3.790  | 1.51E-04  | Yes        | 0.509       | 0.051           | 1.003       | 0.009           | -0.008   | 0.006       |
| Neuroticism               | 106716 |    | 27067015                                                                    | 0.178                         | 0.048          | 3.657  | 2.55E-04  | Yes        | 0.125       | 0.011           | 0.992       | 0.011           | 0.027    | 0.005       |
| Daily cigarettes          | 69028  |    | 20418890                                                                    | 0.276                         | 0.096          | 2.882  | 3.95E-03  | Yes        | 0.032       | 0.009           | 1.007       | 0.007           | -0.002   | 0.005       |
| Major Depressive Disorder | 18759  |    | 22472876                                                                    | 0.261                         | 0.094          | 2.769  | 5.63E-03  | Yes        | 0.155       | 0.029           | 1.013       | 0.008           | -0.002   | 0.007       |
| Caudate Volume            | 13171  |    | 25607358                                                                    | 0.201                         | 0.086          | 2.330  | 1.98E-02  | Yes        | 0.248       | 0.038           | 0.969       | 0.006           | -0.007   | 0.005       |
| HDL cholesterol           | 100184 |    | 20686565                                                                    | 0.114                         | 0.050          | 2.299  | 2.15E-02  | No         | 0.128       | 0.023           | 1.057       | 0.049           | 0.004    | 0.006       |
| Former smoker             | 70675  |    | 20418890                                                                    | -0.171                        | 0.080          | -2.136 | 3.27E-02  | No         | 0.036       | 0.006           | 1.001       | 0.006           | 0.003    | 0.004       |
| Intracranial brain volume | 13171  |    | 25607358                                                                    | 0.199                         | 0.097          | 2.045  | 4.08E-02  | No         | 0.176       | 0.045           | 1.002       | 0.007           | 0.000    | 0.005       |
| Smoking Age Onset         | 47961  |    | 20418890                                                                    | -0.193                        | 0.122          | -1.585 | 1.13E-01  | No         | 0.030       | 0.009           | 1.000       | 0.006           | 0.007    | 0.005       |
| Cognitive performance     | 106736 |    | 25201988                                                                    | 0.075                         | 0.054          | 1.395  | 1.63E-01  | No         | 0.107       | 0.007           | 1.027       | 0.009           | 0.002    | 0.006       |
| Loneliness                | 10760  |    | 27629369                                                                    | 0.223                         | 0.165          | 1.351  | 1.77E-01  | No         | 0.157       | 0.092           | 1.004       | 0.007           | -0.001   | 0.005       |
| Alcohol dependence        | 7280   |    | 24166409                                                                    | 0.202                         | 0.164          | 1.237  | 2.16E-01  | No         | 0.087       | 0.065           | 1.048       | 0.007           | 0.002    | 0.005       |
| Total Cholesterol         | 99900  |    | 20686565                                                                    | 0.065                         | 0.051          | 1.259  | 2.08E-01  | No         | 0.133       | 0.024           | 1.022       | 0.036           | -0.001   | 0.006       |
| College attainment        | 95427  |    | 23722424                                                                    | 0.051                         | 0.057          | 0.902  | 3.67E-01  | No         | 0.105       | 0.008           | 1.021       | 0.009           | 0.005    | 0.006       |
| Extraversion              | 63.030 |    | 26362575                                                                    | -0.058                        | 0.081          | -0.709 | 4.78E-01  | No         | 0.020       | 0.003           | 1.002       | 0.007           | 0.003    | 0.005       |
| Anorexia Nervosa          | 17767  |    | 24514567                                                                    | 0.056                         | 0.083          | 0.673  | 5.01E-01  | No         | 0.190       | 0.031           | 1.011       | 0.008           | -0.004   | 0.006       |
| Height                    | 253288 |    | 25282103                                                                    | -0.018                        | 0.028          | -0.637 | 5.24E-01  | No         | 0.342       | 0.018           | 1.231       | 0.032           | -0.002   | 0.008       |
| Years of Education        | 293723 |    | 27225129                                                                    | 0.022                         | 0.035          | 0.619  | 5.36E-01  | No         | 0.126       | 0.005           | 0.928       | 0.010           | 0.012    | 0.006       |
| LDL cholesterol           | 95454  |    | 20686565                                                                    | 0.028                         | 0.054          | 0.515  | 6.06E-01  | No         | 0.103       | 0.029           | 1.052       | 0.050           | -0.002   | 0.006       |
| Triglycerides             | 96598  |    | 20686565                                                                    | -0.025                        | 0.053          | -0.472 | 6.37E-01  | No         | 0.168       | 0.029           | 0.968       | 0.017           | -0.003   | 0.006       |
| BMI                       | 339224 |    | 25673413                                                                    | 0.029                         | 0.065          | 0.447  | 6.55E-01  | No         | 0.605       | 0.047           | 0.894       | 0.010           | -0.002   | 0.008       |
| Nucleus Accumbens Volume  | 13171  |    | 25607358                                                                    | 0.059                         | 0.131          | 0.446  | 6.55E-01  | No         | 0.090       | 0.037           | 0.979       | 0.007           | -0.004   | 0.005       |
| Childhood Obesity         | 13848  |    | 22484627                                                                    | -0.026                        | 0.059          | -0.439 | 6.61E-01  | No         | 0.415       | 0.046           | 0.922       | 0.008           | -0.001   | 0.005       |
| Childhood IQ              | 12441  |    | 23358156                                                                    | -0.017                        | 0.082          | -0.205 | 8.37E-01  | No         | 0.273       | 0.044           | 1.002       | 0.009           | 0.011    | 0.006       |
| Obesity                   | 98697  |    | 23563607                                                                    | 0.006                         | 0.046          | 0.128  | 8.98E-01  | No         | 0.171       | 0.010           | 0.798       | 0.009           | -0.005   | 0.006       |
| Hippocampus Volume        | 13171  |    | 25607358                                                                    | -0.012                        | 0.106          | -0.117 | 9.07E-01  | No         | 0.141       | 0.040           | 0.988       | 0.007           | -0.008   | 0.005       |
