# Supplementary material
Source: PubMed Central journal article supplement (PMC6365681)
Supplement: NIHMS1510361-supplement-supp_table_6.pdf [file NIHMS1510361-supplement-supp_table_6.pdf]

Supplementary Table 6. Genetic correlation (Rg) comparison between the AUDIT-C and AUDIT-P dimensions (traits with p < 0.05 are highlighted in bold and those with FDR < 0.05 are highlighted in gray)

| Trait                            | AUDIT-C |        |           | AUDIT-P |        |          | AUDIT-C vs. AUDIT-P |     | FDR |
|----------------------------------|---------|--------|-----------|---------|--------|----------|---------------------|-----|-----|
|                                  | Rg      | SE     | Pvalue    | Rg      | SE     | Pvalue   | Pvalue              |     |     |
| <b>Depressive Symptoms</b>       | -0.1917 | 0.0476 | 5.57E-05  | 0.3026  | 0.0546 | 2.98E-08 | 8.85E-12            | Yes |     |
| <b>Schizophrenia</b>             | -0.0003 | 0.0285 | 9.91E-01  | 0.2221  | 0.0353 | 3.00E-10 | 9.48E-07            | Yes |     |
| <b>Neuroticism Smith</b>         | -0.1321 | 0.0371 | 3.72E-04  | 0.1762  | 0.0482 | 2.55E-04 | 4.01E-07            | Yes |     |
| <b>ADHD2 PGC</b>                 | -0.1035 | 0.0437 | 1.77E-02  | 0.234   | 0.0532 | 1.07E-05 | 9.48E-07            | Yes |     |
| <b>Neuroticism</b>               | -0.0899 | 0.042  | 3.25E-02  | 0.2268  | 0.0521 | 1.34E-05 | 2.22E-06            | Yes |     |
| <b>Major Depressive Disorder</b> | -0.2349 | 0.081  | 3.73E-03  | 0.2607  | 0.0942 | 5.63E-03 | 6.63E-05            | Yes |     |
| <b>Years of Education</b>        | 0.1958  | 0.0299 | 5.70E-11  | 0.0217  | 0.035  | 5.36E-01 | 1.56E-04            | Yes |     |
| <b>Obesity</b>                   | -0.1676 | 0.0377 | 8.61E-06  | 0.0059  | 0.0461 | 8.98E-01 | 3.58E-03            | Yes |     |
| <b>Subjective Wellbeing</b>      | -0.0335 | 0.0507 | 5.08E-01  | -0.2399 | 0.0584 | 3.98E-05 | 7.61E-03            | Yes |     |
| <b>Alcohol Consumption UKBB</b>  | 0.9208  | 0.0338 | 6.95E-164 | 0.7608  | 0.05   | 2.67E-52 | 8.02E-03            | Yes |     |
| <b>College attainment</b>        | 0.2414  | 0.0489 | 7.93E-07  | 0.0512  | 0.0568 | 3.67E-01 | 1.12E-02            | Yes |     |
| <b>Alcohol Dependence PGC</b>    | 0.332   | 0.084  | 8.22E-05  | 0.630   | 0.112  | 1.79E-08 | 3.33E-02            | No  |     |
| <b>Smoking Lifetime Use</b>      | 0.240   | 0.056  | 1.57E-05  | 0.407   | 0.064  | 1.73E-10 | 4.96E-02            | No  |     |
| <b>Triglycerides</b>             | -0.164  | 0.043  | 1.00E-04  | -0.025  | 0.053  | 6.37E-01 | 4.17E-02            | No  |     |
| <b>Height</b>                    | 0.056   | 0.024  | 1.99E-02  | -0.018  | 0.028  | 5.24E-01 | 4.48E-02            | No  |     |
| Daily cigarettes                 | 0.041   | 0.090  | 6.50E-01  | 0.276   | 0.096  | 3.95E-03 | 7.41E-02            | No  |     |
| Cannabis Lifetime Use            | 0.256   | 0.066  | 1.13E-04  | 0.460   | 0.085  | 6.77E-08 | 5.80E-02            | No  |     |
| Cognitive performance            | 0.212   | 0.049  | 1.53E-05  | 0.075   | 0.054  | 1.63E-01 | 6.03E-02            | No  |     |
| Bipolar Disorder                 | 0.100   | 0.065  | 1.27E-01  | 0.261   | 0.069  | 1.51E-04 | 8.94E-02            | No  |     |
| BMI                              | -0.105  | 0.053  | 4.56E-02  | 0.029   | 0.065  | 6.55E-01 | 1.10E-01            | No  |     |
| Smoking Age Onset                | 0.043   | 0.105  | 6.85E-01  | -0.193  | 0.122  | 1.13E-01 | 1.43E-01            | No  |     |
| Former smoker                    | -0.016  | 0.075  | 8.35E-01  | -0.171  | 0.080  | 3.27E-02 | 1.58E-01            | No  |     |
| Childhood IQ                     | 0.114   | 0.072  | 1.13E-01  | -0.017  | 0.082  | 8.37E-01 | 2.30E-01            | No  |     |
| HDL cholesterol                  | 0.188   | 0.048  | 9.33E-05  | 0.114   | 0.050  | 2.15E-02 | 2.86E-01            | No  |     |
| Childhood Obesity                | -0.098  | 0.051  | 5.44E-02  | -0.026  | 0.059  | 6.61E-01 | 3.56E-01            | No  |     |
| AUDIT 23andMe                    | 0.761   | 0.117  | 7.59E-11  | 0.639   | 0.133  | 1.58E-06 | 4.91E-01            | No  |     |
| Total Cholesterol                | 0.017   | 0.040  | 6.70E-01  | 0.065   | 0.051  | 2.08E-01 | 4.59E-01            | No  |     |
| Alcohol dependence               | 0.409   | 0.200  | 4.09E-02  | 0.202   | 0.164  | 2.16E-01 | 4.24E-01            | No  |     |
| Caudate Volume                   | 0.141   | 0.068  | 3.90E-02  | 0.201   | 0.086  | 1.98E-02 | 5.84E-01            | No  |     |
| LDL cholesterol                  | -0.009  | 0.044  | 8.38E-01  | 0.028   | 0.054  | 6.06E-01 | 5.95E-01            | No  |     |
| Loneliness                       | 0.181   | 0.153  | 2.36E-01  | 0.223   | 0.165  | 1.77E-01 | 8.52E-01            | No  |     |
| Nucleus Accumbens Volume         | 0.051   | 0.090  | 5.69E-01  | 0.059   | 0.131  | 6.55E-01 | 9.60E-01            | No  |     |
| Intracranial brain volume        | 0.193   | 0.085  | 2.36E-02  | 0.199   | 0.097  | 4.08E-02 | 9.63E-01            | No  |     |
| Extraversion                     | -0.055  | 0.073  | 4.55E-01  | -0.058  | 0.081  | 4.78E-01 | 9.78E-01            | No  |     |
| Alcohol Consumption              | 0.788   | 0.111  | 1.13E-12  | 0.764   | 0.128  | 2.28E-09 | 8.87E-01            | No  |     |
| Anorexia Nervosa                 | 0.052   | 0.073  | 4.76E-01  | 0.056   | 0.083  | 5.01E-01 | 9.71E-01            | No  |     |
| Hippocampus Volume               | -0.013  | 0.090  | 8.89E-01  | -0.012  | 0.106  | 9.07E-01 | 9.94E-01            | No  |     |
