# Supplementary material
Source: PubMed Central journal article supplement (PMC6365681)
Supplement: NIHMS1510361-supplement-supp_table_8.pdf [file NIHMS1510361-supplement-supp_table_8.pdf]

**Supplementary Table 7.** Phenotypic association between AUDIT (total score, AUDIT-C, AUDIT-P) and demographic traits (age, gender), and intercorrelations between the three AUDIT dimensions

|                  | Age                    | Sex         | AUDIT Total score (95% C.I.) | AUDIT-C (95% C.I.) | AUDIT-P (95% C.I.) |
|------------------|------------------------|-------------|------------------------------|--------------------|--------------------|
|                  | Beta (S.E.)            | Beta (S.E.) |                              |                    |                    |
| <b>AUDIT tot</b> | 0.19 (0.00047 (0.006)  |             |                              | 0.91 (0.906-0.908) | 0.80 (0.801-0.806) |
| <b>AUDIT-C</b>   | -0.16 (0.00053 (0.006) |             | 0.91 (0.906-0.908)           |                    | 0.48 (0.473-0.481) |
| <b>AUDIT-P</b>   | -0.16 (0.00022 (0.006) |             | 0.80 (0.801-0.806)           | 0.48 (0.473-0.481) |                    |

AUDIT scores were scaled before performing linear regression association tests with age and sex and therefore betas are standardized. Correlations between AUDIT and subdomain AUDIT scores represent Pearson's correlations.
