# Supplementary material
Source: PubMed Central journal article supplement (PMC6365681)
Supplement: NIHMS1510361-supplement-supp_table_10.pdf [file NIHMS1510361-supplement-supp_table_10.pdf]

**Supplementary Table 10.** Genome-wide significant associations ( $P < 5 \times 10^{-8}$ ) between SNPs and AUDIT-C ordered by chromosomal location

|            |            | AUDIT-C        |    |                |                      |
|------------|------------|----------------|----|----------------|----------------------|
| Chromosome | rsID       | Nearest G      | A1 | Beta (S.E.)    | P                    |
| 2p23.3     | rs1260326  | <i>GCKR</i>    | C  | .007 (0.00155) | $5.5 \times 10^{-9}$ |
| 4p14       | rs11940694 | <i>KLB</i>     | G  | .009 (0.00149) | $10^{-17}$           |
| 4q23       | rs14678803 | <i>METAP1</i>  | G  | .004 (0.00136) | $10^{-17}$           |
| 4q23       | rs11733695 | <i>ADH6</i>    | A  | .006 (0.00120) | $10^{-21}$           |
| 4q23       | rs12299841 | <i>ADH1B</i>   | C  | .005 (0.00138) | $10^{-56}$           |
| 4q24       | rs13107325 | <i>SLC39A8</i> | T  | .001 (0.00130) | $10^{-10}$           |
| 11p11.2    | rs11039364 | <i>FNBP4</i>   | T  | .007 (0.00128) | $10^{-9}$            |
| 16p12.3    | rs72771074 | .              | C  | .007 (0.00150) | $10^{-8}$            |
| 17q21.31   | rs62062285 | <i>MAPT</i>    | A  | .008 (0.0019)  | $10^{-9}$            |

Genes are listed if located within +/- 10kb of a listed SNP. A1=effect allele
