# Supplementary material
Source: PubMed Central journal article supplement (PMC6365681)
Supplement: NIHMS1510361-supplement-supp_table_11.pdf [file NIHMS1510361-supplement-supp_table_11.pdf]

**Supplementary Table 11.** Genome-wide significant associations ( $P < 5 \times 10^{-8}$ ) between SNPs and AUDIT-P ordered by chromosomal location.

| Chromosome | rsID       | Nearest Gene   | AUDIT-P |               |                       |
|------------|------------|----------------|---------|---------------|-----------------------|
|            |            |                | A1      | Beta (S.E.)   | P                     |
| 4p14       | rs11940694 | <i>KLB</i>     | G       | .007 (0.0011) | $1.1 \times 10^{-9}$  |
| 4p23       | rs14678803 | <i>METAP1</i>  | G       | 0.04 (0.0011) | $2.2 \times 10^{-9}$  |
| 4q23       | rs1229984  | <i>ADH1B</i>   | C       | 0.04 (0.0031) | $1.0 \times 10^{-45}$ |
| 4q23       | rs11733695 | <i>ADH6</i>    | A       | 0.04 (0.0067) | $7.7 \times 10^{-13}$ |
| 4q24       | rs13135092 | <i>SLC39A8</i> | G       | 0.01 (0.0024) | $5.5 \times 10^{-15}$ |

Genes are listed if located within +/- 10kb of a listed SNP. A1=effect allele
