# Supplementary material
Source: PubMed Central journal article supplement (PMC6365681)
Supplement: NIHMS1510361-supplement-supp_table_15.pdf [file NIHMS1510361-supplement-supp_table_15.pdf]

Supplementary Table 15. Bonferroni significant results of gene-based association analyses for the GWAS meta-analysis of AUDIT total score (genes identified in the GWAS credible sets are highlighted in gray)

| SYMBOL             | CHR | START   | STOP    | NSNPS | NPARAM | ZSTAT  | P        |
|--------------------|-----|---------|---------|-------|--------|--------|----------|
| <i>KLB</i>         | 4   | 3.9E+07 | 3.9E+07 | 130   | 31     | 7.5328 | 2.48E-14 |
| <i>RFC1</i>        | 4   | 3.9E+07 | 3.9E+07 | 122   | 15     | 6.2305 | 2.32E-10 |
| <i>CPS1</i>        | 2   | 2.1E+08 | 2.1E+08 | 488   | 51     | 6.2095 | 2.66E-10 |
| <i>WNT3</i>        | 17  | 4.5E+07 | 4.5E+07 | 106   | 22     | 6.1954 | 2.91E-10 |
| <i>SNX17</i>       | 2   | 2.8E+07 | 2.8E+07 | 14    | 6      | 5.9324 | 1.49E-09 |
| <i>CADM2</i>       | 3   | 8.5E+07 | 8.6E+07 | 3059  | 93     | 5.9167 | 1.64E-09 |
| <i>GCKR</i>        | 2   | 2.8E+07 | 2.8E+07 | 60    | 13     | 5.7272 | 5.11E-09 |
| <i>SLC39A13</i>    | 11  | 4.7E+07 | 4.7E+07 | 20    | 4      | 5.6963 | 6.12E-09 |
| <i>STH</i>         | 17  | 4.4E+07 | 4.4E+07 | 1     | 1      | 5.5597 | 1.35E-08 |
| <i>RASIP1</i>      | 19  | 4.9E+07 | 4.9E+07 | 46    | 7      | 5.5118 | 1.78E-08 |
| <i>NSF</i>         | 17  | 4.5E+07 | 4.5E+07 | 55    | 6      | 5.4621 | 2.35E-08 |
| <i>GTF3C2</i>      | 2   | 2.8E+07 | 2.8E+07 | 24    | 9      | 5.425  | 2.90E-08 |
| <i>FNBP4</i>       | 11  | 4.8E+07 | 4.8E+07 | 120   | 17     | 5.3927 | 3.47E-08 |
| <i>CRHR1</i>       | 17  | 4.4E+07 | 4.4E+07 | 901   | 12     | 5.3841 | 3.64E-08 |
| <i>MAPT</i>        | 17  | 4.4E+07 | 4.4E+07 | 654   | 8      | 5.3806 | 3.71E-08 |
| <i>KANSL1</i>      | 17  | 4.4E+07 | 4.4E+07 | 645   | 7      | 5.3789 | 3.75E-08 |
| <i>SPI1</i>        | 11  | 4.7E+07 | 4.7E+07 | 71    | 10     | 5.3521 | 4.35E-08 |
| <i>SPPL2C</i>      | 17  | 4.4E+07 | 4.4E+07 | 17    | 2      | 5.3433 | 4.56E-08 |
| <i>NUP160</i>      | 11  | 4.8E+07 | 4.8E+07 | 141   | 17     | 5.3345 | 4.79E-08 |
| <i>DRD2</i>        | 11  | 1.1E+08 | 1.1E+08 | 183   | 29     | 5.3323 | 4.85E-08 |
| <i>AGBL2</i>       | 11  | 4.8E+07 | 4.8E+07 | 113   | 15     | 5.3167 | 5.28E-08 |
| <i>PSMC3</i>       | 11  | 4.7E+07 | 4.7E+07 | 15    | 5      | 5.287  | 6.22E-08 |
| <i>FUT2</i>        | 19  | 4.9E+07 | 4.9E+07 | 37    | 5      | 5.2157 | 9.16E-08 |
| <i>IFT172</i>      | 2   | 2.8E+07 | 2.8E+07 | 80    | 15     | 5.1342 | 1.42E-07 |
| <i>NEGR1</i>       | 1   | 7.2E+07 | 7.3E+07 | 1880  | 132    | 5.1336 | 1.42E-07 |
| <i>PPM1G</i>       | 2   | 2.8E+07 | 2.8E+07 | 50    | 11     | 5.1223 | 1.51E-07 |
| <i>rs11-766F14</i> | 4   | 1E+08   | 1E+08   | 58    | 15     | 4.8742 | 5.46E-07 |
| <i>WDR19</i>       | 4   | 3.9E+07 | 3.9E+07 | 171   | 13     | 4.7935 | 8.20E-07 |
| <i>PLEKHM1</i>     | 17  | 4.4E+07 | 4.4E+07 | 85    | 7      | 4.7902 | 8.33E-07 |
| <i>MAMSTR</i>      | 19  | 4.9E+07 | 4.9E+07 | 19    | 4      | 4.7542 | 9.96E-07 |
| <i>NRBP1</i>       | 2   | 2.8E+07 | 2.8E+07 | 26    | 7      | 4.735  | 1.10E-06 |
| <i>IZUMO1</i>      | 19  | 4.9E+07 | 4.9E+07 | 25    | 2      | 4.7065 | 1.26E-06 |
| <i>ARRHGAP2</i>    | 17  | 4.3E+07 | 4.4E+07 | 96    | 8      | 4.6738 | 1.48E-06 |
| <i>TRIM59</i>      | 3   | 1.6E+08 | 1.6E+08 | 144   | 25     | 4.6372 | 1.77E-06 |
| <i>ASXL3</i>       | 18  | 3.1E+07 | 3.1E+07 | 434   | 49     | 4.6186 | 1.93E-06 |
| <i>LANCL1</i>      | 2   | 2.1E+08 | 2.1E+08 | 126   | 14     | 4.5979 | 2.13E-06 |
| <i>NFKB1</i>       | 4   | 1E+08   | 1E+08   | 275   | 24     | 4.5962 | 2.15E-06 |
| <i>FOXP1</i>       | 3   | 7.1E+07 | 7.2E+07 | 1369  | 175    | 4.5937 | 2.18E-06 |
| <i>KPNA4</i>       | 3   | 1.6E+08 | 1.6E+08 | 150   | 23     | 4.5929 | 2.19E-06 |
| <i>ATP2A1</i>      | 16  | 2.9E+07 | 2.9E+07 | 32    | 7      | 4.5635 | 2.52E-06 |
