# Supplementary material
Source: PubMed Central journal article supplement (PMC6365681)
Supplement: NIHMS1510361-supplement-supp_table_17.pdf [file NIHMS1510361-supplement-supp_table_17.pdf]

**Supplementary Table 17.** Comparison of results of gene-based association analyses for the three AUDIT dimensions

| MAGMA OVERLAP |          |         | MAGMA UNIQUE  |         |         |
|---------------|----------|---------|---------------|---------|---------|
| AUDIT total   | AUDIT-C  | AUDIT-P | AUDIT total   | AUDIT-C | AUDIT-P |
| KLB           | KLB      | KLB     | SNX17         | ZC3H7B  |         |
| CADM2         | CADM2    | CADM2   | GCKR          | LRPPRC  |         |
| RFC1          | RFC1     |         | GTF3C2        | ACO2    |         |
| CPS1          | CPS1     |         | IFT172        | RANGAP1 |         |
| WNT3          | WNT3     |         | NEGR1         | ARL17B  |         |
| SLC39A13      | SLC39A13 |         | PPM1G         |         |         |
| CRHR1         | CRHR1    |         | RP11-766F14.2 |         |         |
| KANSL1        | KANSL1   |         | WDR19         |         |         |
| STH           | STH      |         | MAMSTR        |         |         |
| MAPT          | MAPT     |         | NRBP1         |         |         |
| RASIP1        | RASIP1   |         | IZUMO1        |         |         |
| NSF           | NSF      |         | ARHGAP27      |         |         |
| SPPL2C        | SPPL2C   |         | TRIM59        |         |         |
| FNBP4         | FNBP4    |         | ASXL3         |         |         |
| SPI1          | SPI1     |         | NFKB1         |         |         |
| NUP160        | NUP160   |         | FOXP1         |         |         |
| AGBL2         | AGBL2    |         | KPNA4         |         |         |
| PSMC3         | PSMC3    |         | ATP2A1        |         |         |
| FUT2          | FUT2     |         |               |         |         |
| PLEKHM1       | PLEKHM1  |         |               |         |         |
| LANCL1        | LANCL1   |         |               |         |         |
| DRD2          |          | DRD2    |               |         |         |
