# Supplementary material
Source: PubMed Central journal article supplement (PMC6365681)
Supplement: NIHMS1510361-supplement-supp_table_18.pdf [file NIHMS1510361-supplement-supp_table_18.pdf]

**Supplementary Table 18.** Bonferroni significant results of gene-based association analyses for the GWAS meta-analysis of AUDIT total scores

| Gene name     | Z score | P value  | expression | icted | perfo    | IPs used | ( covarian | Ps model | rain tissue         |
|---------------|---------|----------|------------|-------|----------|----------|------------|----------|---------------------|
| RFC1          | -6.77   | 1.25E-11 | 0.12       | 0.22  | 4.26E-07 | 54       | 54         | 54       | hemisphere          |
| LRRC37A2      | -6.13   | 8.87E-10 | 0.22       | 0.64  | 1.46E-34 | 32       | 40         | 40       | cerebellum          |
| RP11-259G18.3 | -6.06   | 1.32E-09 | 0.23       | 0.61  | 7.25E-26 | 48       | 65         | 65       | hemisphere          |
| SPPL2C        | -5.94   | 2.85E-09 | 0.06       | 0.36  | 5.43E-15 | 26       | 38         | 38       | cerebellum          |
| LRRC37A2      | -5.91   | 3.43E-09 | 0.34       | 0.69  | 9.54E-34 | 36       | 49         | 49       | hemisphere          |
| RP11-259G18.1 | -5.91   | 3.48E-09 | 0.21       | 0.16  | 8.92E-06 | 36       | 41         | 41       | rontal cortex       |
| RP11-707O23.5 | -5.89   | 3.93E-09 | 0.10       | 0.50  | 1.92E-17 | 13       | 22         | 22       | ippocampus          |
| CRHR1-IT1     | -5.88   | 4.13E-09 | 0.07       | 0.29  | 1.63E-09 | 15       | 24         | 24       | rontal cortex       |
| DND1P1        | -5.85   | 4.87E-09 | 0.01       | 0.46  | 3.42E-19 | 5        | 10         | 10       | caudate             |
| PLEKHM1       | 5.83    | 5.66E-09 | 0.31       | 0.56  | 1.02E-28 | 35       | 45         | 45       | cerebellum          |
| ARL17A        | -5.82   | 5.86E-09 | 0.25       | 0.60  | 4.74E-31 | 29       | 37         | 37       | cerebellum          |
| LRRC37A4P     | 5.79    | 6.85E-09 | 0.47       | 0.62  | 1.07E-27 | 323      | 332        | 332      | hemisphere          |
| DND1P1        | -5.79   | 7.11E-09 | 0.02       | 0.32  | 2.66E-09 | 10       | 19         | 19       | ypothalamus         |
| RP11-707O23.5 | -5.77   | 7.79E-09 | 0.09       | 0.55  | 7.83E-27 | 9        | 16         | 16       | cerebellum          |
| MAPT          | 5.77    | 8.09E-09 | 0.05       | 0.08  | 1.56E-03 | 13       | 16         | 16       | cerebellum          |
| CRHR1-IT1     | -5.76   | 8.55E-09 | 0.07       | 0.49  | 1.10E-17 | 13       | 24         | 24       | putamen             |
| LRRC37A4P     | 5.74    | 9.60E-09 | 0.14       | 0.36  | 3.49E-15 | 411      | 428        | 428      | ypothalamus         |
| RP11-259G18.2 | -5.74   | 9.69E-09 | 0.17       | 0.55  | 1.87E-19 | 33       | 39         | 39       | ir cingulate cortex |
| SPPL2C        | -5.73   | 9.79E-09 | 0.04       | 0.26  | 1.20E-08 | 18       | 41         | 41       | hemisphere          |
| RP11-259G18.1 | -5.73   | 9.98E-09 | 0.10       | 0.37  | 2.04E-13 | 24       | 47         | 47       | cortex              |
| RP11-259G18.1 | -5.73   | 1.03E-08 | 0.26       | 0.56  | 1.29E-27 | 38       | 44         | 44       | cerebellum          |
| RP11-259G18.2 | -5.72   | 1.08E-08 | 0.04       | 0.48  | 6.68E-15 | 13       | 20         | 20       | ypothalamus         |
| ZNF513        | -5.71   | 1.10E-08 | 0.10       | 0.10  | 1.38E-03 | 30       | 31         | 31       | ir cingulate cortex |
| DND1P1        | -5.71   | 1.13E-08 | 0.05       | 0.35  | 6.60E-12 | 21       | 27         | 27       | hemisphere          |
| RP11-259G18.3 | -5.70   | 1.19E-08 | 0.12       | 0.41  | 1.74E-13 | 27       | 35         | 35       | rontal cortex       |
| RP11-259G18.2 | -5.68   | 1.36E-08 | 0.10       | 0.51  | 1.18E-23 | 31       | 38         | 38       | cerebellum          |
| LRRC37A4P     | 5.67    | 1.44E-08 | 0.32       | 0.57  | 2.09E-23 | 19       | 23         | 23       | us accumbens        |
| FMNL1         | 5.67    | 1.47E-08 | 0.20       | 0.39  | 7.77E-15 | 27       | 28         | 28       | hemisphere          |
| RP11-259G18.2 | -5.66   | 1.54E-08 | 0.07       | 0.53  | 3.17E-17 | 11       | 23         | 23       | putamen             |
| RP11-707O23.5 | -5.65   | 1.58E-08 | 0.12       | 0.59  | 4.17E-26 | 19       | 36         | 36       | cortex              |
| RP11-259G18.3 | -5.64   | 1.66E-08 | 0.23       | 0.51  | 1.40E-19 | 17       | 24         | 24       | us accumbens        |
| RP11-707O23.5 | -5.64   | 1.68E-08 | 0.02       | 0.44  | 1.11E-15 | 6        | 18         | 18       | rontal cortex       |
| LRRC37A4P     | 5.64    | 1.73E-08 | 0.35       | 0.65  | 6.55E-32 | 359      | 375        | 375      | cortex              |
| RP11-707O23.5 | -5.64   | 1.74E-08 | 0.09       | 0.48  | 1.30E-19 | 12       | 22         | 22       | us accumbens        |
| LRRC37A4P     | 5.63    | 1.78E-08 | 0.37       | 0.53  | 3.58E-28 | 433      | 438        | 438      | cerebellum          |
| LRRC37A4P     | 5.62    | 1.88E-08 | 0.38       | 0.55  | 3.55E-20 | 38       | 44         | 44       | ippocampus          |
| ARHGAP27      | -5.62   | 1.93E-08 | 0.10       | 0.19  | 1.27E-06 | 23       | 27         | 27       | us accumbens        |
| ARL17A        | -5.60   | 2.14E-08 | 0.15       | 0.29  | 2.77E-10 | 22       | 29         | 29       | us accumbens        |
| RP11-259G18.2 | -5.58   | 2.35E-08 | 0.01       | 0.40  | 3.86E-13 | 5        | 13         | 13       | rontal cortex       |
| LRRC37A2      | -5.58   | 2.41E-08 | 0.52       | 0.60  | 2.84E-29 | 71       | 79         | 79       | caudate             |
| RP11-259G18.1 | -5.57   | 2.48E-08 | 0.06       | 0.13  | 3.07E-04 | 24       | 25         | 25       | ypothalamus         |
| NTN5          | 5.56    | 2.70E-08 | 0.02       | 0.08  | 4.23E-03 | 9        | 9          | 9        | hemisphere          |
| LRRC37A4P     | 5.56    | 2.73E-08 | 0.53       | 0.61  | 1.13E-23 | 54       | 56         | 56       | rontal cortex       |
| MAMSTR        | 5.55    | 2.88E-08 | 0.03       | 0.13  | 2.26E-04 | 18       | 18         | 18       | ypothalamus         |
| RP11-259G18.3 | -5.54   | 2.95E-08 | 0.31       | 0.57  | 1.98E-21 | 67       | 72         | 72       | ir cingulate cortex |
| NTN5          | 5.54    | 3.08E-08 | 0.05       | 0.07  | 9.16E-03 | 5        | 5          | 5        | ypothalamus         |
| RP11-259G18.3 | -5.54   | 3.08E-08 | 0.11       | 0.33  | 6.89E-17 | 36       | 56         | 56       | caudate             |
| CRHR1-IT1     | -5.49   | 3.96E-08 | 0.12       | 0.47  | 4.14E-19 | 15       | 31         | 31       | caudate             |
| DND1P1        | -5.48   | 4.17E-08 | 0.05       | 0.38  | 1.65E-12 | 15       | 24         | 24       | rontal cortex       |
| RP11-259G18.2 | -5.48   | 4.33E-08 | 0.24       | 0.51  | 9.70E-20 | 41       | 45         | 45       | ippocampus          |
| FUT2          | 5.46    | 4.75E-08 | 0.02       | 0.05  | 2.11E-02 | 9        | 9          | 9        | us accumbens        |
| LRRC37A4P     | 5.44    | 5.31E-08 | 0.41       | 0.65  | 6.54E-33 | 20       | 26         | 26       | caudate             |
| RP11-360F5.3  | -5.43   | 5.71E-08 | 0.16       | 0.25  | 2.31E-10 | 47       | 47         | 47       | cerebellum          |
| LRRC37A2      | -5.42   | 5.80E-08 | 0.24       | 0.67  | 1.12E-33 | 33       | 42         | 42       | cortex              |
| LRRC37A4P     | 5.42    | 5.94E-08 | 0.21       | 0.55  | 3.90E-18 | 35       | 43         | 43       | putamen             |
| RP11-259G18.3 | -5.41   | 6.26E-08 | 0.07       | 0.58  | 7.78E-30 | 33       | 44         | 44       | cerebellum          |
| SPPL2C        | -5.41   | 6.27E-08 | 0.05       | 0.10  | 1.47E-03 | 9        | 10         | 10       | rontal cortex       |
| LRRC37A       | -5.40   | 6.76E-08 | 0.21       | 0.51  | 2.93E-23 | 20       | 23         | 23       | cerebellum          |
| FMNL1         | 5.40    | 6.77E-08 | 0.21       | 0.29  | 7.06E-13 | 373      | 374        | 374      | cerebellum          |
| RP11-360F5.3  | -5.39   | 6.86E-08 | 0.07       | 0.17  | 8.48E-06 | 26       | 26         | 26       | cortex              |
| DND1P1        | -5.39   | 7.04E-08 | 0.14       | 0.57  | 1.76E-25 | 24       | 36         | 36       | cortex              |
| RP11-707O23.5 | -5.37   | 7.80E-08 | 0.12       | 0.49  | 2.94E-16 | 25       | 33         | 33       | putamen             |
| CRHR1-IT1     | -5.36   | 8.22E-08 | 0.18       | 0.40  | 1.56E-14 | 19       | 25         | 25       | cortex              |
| FAM180B       | -5.36   | 8.28E-08 | 0.01       | 0.05  | 2.51E-02 | 13       | 13         | 13       | hemisphere          |

|               |       |          |      |      |          |     |     |     |                     |
|---------------|-------|----------|------|------|----------|-----|-----|-----|---------------------|
| CRHR1-IT1     | -5.35 | 8.99E-08 | 0.11 | 0.27 | 2.01E-08 | 16  | 28  | 28  | ypothalamus         |
| PLEKHM1       | 5.33  | 9.69E-08 | 0.32 | 0.57 | 6.87E-23 | 30  | 38  | 38  | temisphere          |
| ARL17A        | -5.32 | 1.02E-07 | 0.25 | 0.41 | 2.15E-16 | 22  | 23  | 23  | caudate             |
| LRRC37A2      | -5.32 | 1.03E-07 | 0.13 | 0.51 | 3.58E-18 | 22  | 32  | 32  | rontal cortex       |
| RP11-798G7.8  | -5.32 | 1.04E-07 | 0.20 | 0.28 | 5.11E-10 | 23  | 29  | 29  | temisphere          |
| RP11-707O23.5 | -5.31 | 1.09E-07 | 0.16 | 0.56 | 3.93E-23 | 17  | 33  | 33  | temisphere          |
| RP11-259G18.3 | -5.31 | 1.13E-07 | 0.23 | 0.60 | 8.86E-28 | 57  | 70  | 70  | cortex              |
| LRRC37A2      | -5.29 | 1.19E-07 | 0.28 | 0.57 | 1.12E-21 | 25  | 33  | 33  | ir cingulate cortex |
| ARL17A        | -5.28 | 1.28E-07 | 0.27 | 0.48 | 1.33E-18 | 28  | 34  | 34  | cortex              |
| DND1P1        | -5.28 | 1.31E-07 | 0.12 | 0.42 | 4.71E-15 | 17  | 20  | 20  | aus accumbens       |
| SLC39A13      | -5.27 | 1.38E-07 | 0.03 | 0.05 | 2.66E-02 | 18  | 18  | 18  | ir cingulate cortex |
| CRHR1-IT1     | -5.23 | 1.67E-07 | 0.15 | 0.18 | 4.73E-08 | 24  | 26  | 26  | cerebellum          |
| CRHR1-IT1     | -5.22 | 1.79E-07 | 0.22 | 0.41 | 1.04E-12 | 36  | 39  | 39  | ippocampus          |
| CRHR1-IT1     | -5.21 | 1.84E-07 | 0.07 | 0.39 | 5.17E-13 | 21  | 35  | 35  | ir cingulate cortex |
| RP11-259G18.2 | -5.21 | 1.86E-07 | 0.10 | 0.53 | 4.86E-23 | 19  | 34  | 34  | caudate             |
| ARL17A        | -5.21 | 1.91E-07 | 0.23 | 0.35 | 1.92E-10 | 39  | 43  | 43  | putamen             |
| SLC39A13      | -5.21 | 1.93E-07 | 0.03 | 0.04 | 3.35E-02 | 5   | 5   | 5   | caudate             |
| RP11-259G18.2 | -5.16 | 2.52E-07 | 0.20 | 0.52 | 1.35E-20 | 46  | 57  | 57  | cortex              |
| LRRC37A2      | -5.14 | 2.76E-07 | 0.41 | 0.62 | 1.44E-23 | 68  | 79  | 79  | ypothalamus         |
| ARL17A        | -5.14 | 2.76E-07 | 0.25 | 0.43 | 6.96E-14 | 41  | 50  | 50  | rontal cortex       |
| ARL17A        | -5.12 | 3.07E-07 | 0.04 | 0.38 | 5.36E-13 | 24  | 31  | 31  | ir cingulate cortex |
| NTN5          | 5.11  | 3.26E-07 | 0.04 | 0.04 | 2.28E-02 | 20  | 20  | 20  | cortex              |
| PLEKHM1       | -5.09 | 3.51E-07 | 0.06 | 0.15 | 7.31E-05 | 12  | 12  | 12  | ir cingulate cortex |
| RFC1          | -5.08 | 3.80E-07 | 0.03 | 0.06 | 5.63E-03 | 30  | 30  | 30  | cerebellum          |
| MTCH2         | -5.06 | 4.22E-07 | 0.05 | 0.23 | 1.36E-07 | 23  | 24  | 24  | aus accumbens       |
| LRRC37A2      | -4.99 | 5.91E-07 | 0.25 | 0.54 | 3.04E-18 | 39  | 46  | 46  | ippocampus          |
| MTCH2         | -4.99 | 5.99E-07 | 0.08 | 0.12 | 4.08E-04 | 22  | 22  | 22  | ir cingulate cortex |
| LRRC37A17P    | 4.97  | 6.76E-07 | 0.04 | 0.09 | 7.74E-04 | 14  | 16  | 16  | cerebellum          |
| RP11-259G18.1 | -4.97 | 6.76E-07 | 0.27 | 0.32 | 3.84E-11 | 34  | 35  | 35  | aus accumbens       |
| NDUFS3        | -4.96 | 7.09E-07 | 0.03 | 0.09 | 3.89E-04 | 33  | 33  | 33  | cerebellum          |
| RPS26P8       | -4.95 | 7.35E-07 | 0.13 | 0.28 | 3.84E-09 | 18  | 23  | 23  | temisphere          |
| MTCH2         | -4.95 | 7.50E-07 | 0.06 | 0.14 | 8.06E-05 | 30  | 30  | 30  | rontal cortex       |
| RP11-707O23.5 | -4.95 | 7.58E-07 | 0.27 | 0.50 | 4.93E-17 | 43  | 50  | 50  | ir cingulate cortex |
| NDUFS3        | -4.94 | 7.84E-07 | 0.16 | 0.12 | 1.35E-04 | 51  | 51  | 51  | temisphere          |
| FUT2          | 4.93  | 8.17E-07 | 0.19 | 0.15 | 1.36E-05 | 41  | 45  | 45  | caudate             |
| ARL17A        | -4.91 | 9.06E-07 | 0.57 | 0.66 | 1.14E-29 | 104 | 117 | 117 | temisphere          |
| PLEKHM1       | -4.90 | 9.37E-07 | 0.06 | 0.17 | 3.04E-06 | 12  | 12  | 12  | caudate             |
| RP11-259G18.3 | -4.90 | 9.62E-07 | 0.11 | 0.50 | 9.02E-16 | 42  | 47  | 47  | ypothalamus         |
| LRRC37A4P     | 4.89  | 9.92E-07 | 0.30 | 0.73 | 1.50E-36 | 34  | 40  | 40  | ir cingulate cortex |
| RP11-707O23.5 | -4.89 | 9.95E-07 | 0.03 | 0.39 | 9.15E-12 | 18  | 26  | 26  | ypothalamus         |
| LRRC37A2      | -4.89 | 9.99E-07 | 0.21 | 0.57 | 6.36E-25 | 25  | 38  | 38  | aus accumbens       |
| ARL17A        | -4.88 | 1.05E-06 | 0.24 | 0.45 | 6.32E-14 | 46  | 52  | 52  | ypothalamus         |
| SULT1A1       | 4.88  | 1.06E-06 | 0.17 | 0.11 | 1.00E-03 | 46  | 50  | 50  | ippocampus          |
| PLEKHM1       | -4.88 | 1.07E-06 | 0.05 | 0.12 | 2.27E-04 | 13  | 13  | 13  | aus accumbens       |
| LRRC37A2      | -4.88 | 1.07E-06 | 0.25 | 0.61 | 3.54E-22 | 47  | 56  | 56  | putamen             |
