# Supplementary material
Source: PubMed Central journal article supplement (PMC6365681)
Supplement: NIHMS1510361-supplement-supp_table_19.pdf [file NIHMS1510361-supplement-supp_table_19.pdf]

**Supplementary Table 19.** Bonferroni significant results of gene-based association analyses for the GWAS meta-analysis of AUDIT-C

| Gene name | Z score | Effect size | P value  | expression | ctd   | perfected | perfo | Ps used | ( covarian | Ps model | rain tissue        |
|-----------|---------|-------------|----------|------------|-------|-----------|-------|---------|------------|----------|--------------------|
| MAPT      | 5.919   | 0.021       | 3.24E-09 | 0.058      | 0.076 | 1.56E-03  | 16    | 16      | 16         |          | cerebellum         |
| CRHR1-IT1 | -5.840  | -0.011      | 5.23E-09 | 0.190      | 0.291 | 1.63E-09  | 24    | 24      | 24         |          | rontal cortex      |
| PLEKHM1   | 5.718   | 0.007       | 1.08E-08 | 0.472      | 0.562 | 1.02E-28  | 45    | 45      | 45         |          | cerebellum         |
| SPPL2C    | -5.699  | -0.010      | 1.21E-08 | 0.233      | 0.358 | 5.43E-15  | 38    | 38      | 38         |          | cerebellum         |
| .RRC37A4  | 5.697   | 0.007       | 1.22E-08 | 0.436      | 0.574 | 2.09E-23  | 23    | 23      | 23         |          | us accumbens       |
| 11-259G1  | -5.694  | -0.006      | 1.24E-08 | 0.605      | 0.605 | 8.86E-28  | 70    | 70      | 70         |          | cortex             |
| DND1P1    | -5.693  | -0.011      | 1.25E-08 | 0.177      | 0.320 | 2.66E-09  | 19    | 19      | 19         |          | ypothalamus        |
| 11-707O2  | -5.682  | -0.008      | 1.33E-08 | 0.296      | 0.478 | 1.30E-19  | 22    | 22      | 22         |          | us accumbens       |
| LRRC37A2  | -5.681  | -0.007      | 1.34E-08 | 0.506      | 0.638 | 1.46E-34  | 40    | 40      | 40         |          | cerebellum         |
| 11-707O2  | -5.659  | -0.009      | 1.52E-08 | 0.282      | 0.504 | 1.92E-17  | 22    | 22      | 22         |          | ippocampus         |
| DND1P1    | -5.644  | -0.008      | 1.66E-08 | 0.291      | 0.461 | 3.42E-19  | 10    | 10      | 10         |          | caudate            |
| ARHGAP2   | -5.643  | -0.012      | 1.67E-08 | 0.143      | 0.192 | 1.27E-06  | 27    | 27      | 27         |          | us accumbens       |
| ARL17A    | -5.625  | -0.010      | 1.85E-08 | 0.213      | 0.295 | 2.77E-10  | 29    | 29      | 29         |          | us accumbens       |
| 11-259G1  | -5.616  | -0.009      | 1.95E-08 | 0.233      | 0.365 | 2.04E-13  | 47    | 47      | 47         |          | cortex             |
| 11-259G1  | -5.598  | -0.008      | 2.17E-08 | 0.302      | 0.527 | 3.17E-17  | 23    | 23      | 23         |          | putamen            |
| .RRC37A4  | 5.572   | 0.007       | 2.52E-08 | 0.473      | 0.546 | 3.55E-20  | 44    | 44      | 44         |          | ippocampus         |
| .RRC37A4  | 5.565   | 0.008       | 2.63E-08 | 0.299      | 0.356 | 3.49E-15  | 428   | 428     | 428        |          | ypothalamus        |
| DND1P1    | -5.560  | -0.008      | 2.70E-08 | 0.316      | 0.432 | 9.56E-15  | 22    | 22      | 22         |          | r cingulate cortex |
| CRHR1-IT1 | -5.549  | -0.007      | 2.87E-08 | 0.406      | 0.486 | 1.10E-17  | 24    | 24      | 24         |          | putamen            |
| 11-259G1  | -5.546  | -0.007      | 2.92E-08 | 0.477      | 0.556 | 1.29E-27  | 44    | 44      | 44         |          | cerebellum         |
| 11-259G1  | -5.539  | -0.007      | 3.04E-08 | 0.481      | 0.579 | 7.78E-30  | 44    | 44      | 44         |          | cerebellum         |
| ARL17A    | -5.531  | -0.007      | 3.19E-08 | 0.447      | 0.600 | 4.74E-31  | 37    | 37      | 37         |          | cerebellum         |
| 11-259G1  | -5.530  | -0.008      | 3.21E-08 | 0.327      | 0.547 | 1.87E-19  | 39    | 39      | 39         |          | r cingulate cortex |
| 11-259G1  | -5.524  | -0.007      | 3.32E-08 | 0.404      | 0.333 | 6.89E-17  | 56    | 56      | 56         |          | caudate            |
| 11-707O2  | -5.517  | -0.007      | 3.45E-08 | 0.368      | 0.554 | 7.83E-27  | 16    | 16      | 16         |          | cerebellum         |
| 11-259G1  | -5.514  | -0.008      | 3.50E-08 | 0.326      | 0.513 | 1.40E-19  | 24    | 24      | 24         |          | us accumbens       |
| 11-707O2  | -5.511  | -0.008      | 3.57E-08 | 0.233      | 0.438 | 1.11E-15  | 18    | 18      | 18         |          | rontal cortex      |
| DND1P1    | -5.501  | -0.007      | 3.77E-08 | 0.357      | 0.420 | 4.71E-15  | 20    | 20      | 20         |          | us accumbens       |
| CRHR1-IT1 | -5.491  | -0.009      | 4.00E-08 | 0.267      | 0.385 | 5.17E-13  | 35    | 35      | 35         |          | r cingulate cortex |
| 11-259G1  | -5.487  | -0.008      | 4.09E-08 | 0.242      | 0.395 | 3.86E-13  | 13    | 13      | 13         |          | rontal cortex      |
| 11-259G1  | -5.479  | -0.007      | 4.27E-08 | 0.380      | 0.415 | 1.74E-13  | 35    | 35      | 35         |          | rontal cortex      |
| 11-259G1  | -5.467  | -0.007      | 4.58E-08 | 0.423      | 0.532 | 4.86E-23  | 34    | 34      | 34         |          | caudate            |
| .RRC37A4  | 5.458   | 0.007       | 4.81E-08 | 0.449      | 0.546 | 3.90E-18  | 42    | 43      | 43         |          | putamen            |
| 11-259G1  | -5.454  | -0.009      | 4.91E-08 | 0.241      | 0.475 | 6.68E-15  | 20    | 20      | 20         |          | ypothalamus        |
| .RRC37A4  | 5.446   | 0.006       | 5.16E-08 | 0.616      | 0.735 | 1.50E-36  | 40    | 40      | 40         |          | r cingulate cortex |
| .RRC37A4  | 5.426   | 0.007       | 5.76E-08 | 0.459      | 0.646 | 6.55E-32  | 375   | 375     | 375        |          | cortex             |
| .RRC37A4  | 5.420   | 0.008       | 5.96E-08 | 0.388      | 0.530 | 3.58E-28  | 438   | 438     | 438        |          | cerebellum         |
| CRHR1-IT1 | -5.418  | -0.008      | 6.01E-08 | 0.284      | 0.465 | 4.14E-19  | 31    | 31      | 31         |          | caudate            |
| ARL17A    | -5.418  | -0.011      | 6.03E-08 | 0.146      | 0.385 | 5.36E-13  | 31    | 31      | 31         |          | r cingulate cortex |
| 11-259G1  | -5.414  | -0.007      | 6.18E-08 | 0.335      | 0.514 | 1.18E-23  | 38    | 38      | 38         |          | cerebellum         |
| 11-259G1  | -5.410  | -0.015      | 6.31E-08 | 0.090      | 0.128 | 3.07E-04  | 25    | 25      | 25         |          | ypothalamus        |
| 11-707O2  | -5.393  | -0.006      | 6.92E-08 | 0.458      | 0.591 | 4.17E-26  | 36    | 36      | 36         |          | cortex             |
| CRHR1-IT1 | -5.366  | -0.008      | 8.06E-08 | 0.304      | 0.398 | 1.56E-14  | 25    | 25      | 25         |          | cortex             |
| DND1P1    | -5.340  | -0.008      | 9.29E-08 | 0.205      | 0.377 | 1.65E-12  | 24    | 24      | 24         |          | rontal cortex      |
| ARL17A    | -5.335  | -0.007      | 9.58E-08 | 0.382      | 0.485 | 1.33E-18  | 34    | 34      | 34         |          | cortex             |
| LRRC37A2  | -5.334  | -0.005      | 9.63E-08 | 0.630      | 0.598 | 2.84E-29  | 78    | 79      | 79         |          | caudate            |
| DND1P1    | -5.313  | -0.006      | 1.08E-07 | 0.416      | 0.565 | 1.76E-25  | 36    | 36      | 36         |          | cortex             |
| LRRC37A2  | -5.305  | -0.006      | 1.13E-07 | 0.583      | 0.572 | 1.12E-21  | 32    | 33      | 33         |          | r cingulate cortex |
| DND1P1    | -5.304  | -0.007      | 1.13E-07 | 0.382      | 0.330 | 2.29E-11  | 25    | 25      | 25         |          | ippocampus         |
| 11-259G1  | -5.304  | -0.006      | 1.13E-07 | 0.509      | 0.515 | 1.35E-20  | 57    | 57      | 57         |          | cortex             |
| 11-707O2  | -5.296  | -0.007      | 1.18E-07 | 0.371      | 0.391 | 9.15E-12  | 26    | 26      | 26         |          | ypothalamus        |
| CRHR1-IT1 | -5.291  | -0.009      | 1.22E-07 | 0.251      | 0.289 | 6.32E-10  | 35    | 35      | 35         |          | us accumbens       |
| 11-259G1  | -5.289  | -0.007      | 1.23E-07 | 0.413      | 0.478 | 1.65E-15  | 43    | 43      | 43         |          | ippocampus         |
| LRRC37A2  | -5.277  | -0.006      | 1.31E-07 | 0.509      | 0.544 | 3.04E-18  | 45    | 46      | 46         |          | ippocampus         |
| 11-707O2  | -5.276  | -0.006      | 1.32E-07 | 0.470      | 0.493 | 2.94E-16  | 32    | 33      | 33         |          | putamen            |
| 11-259G1  | -5.258  | -0.005      | 1.46E-07 | 0.585      | 0.567 | 1.98E-21  | 71    | 72      | 72         |          | r cingulate cortex |
| 11-259G1  | -5.229  | -0.008      | 1.70E-07 | 0.322      | 0.506 | 9.70E-20  | 45    | 45      | 45         |          | ippocampus         |
| .RRC37A4  | 5.219   | 0.006       | 1.80E-07 | 0.521      | 0.652 | 6.54E-33  | 26    | 26      | 26         |          | caudate            |
| LRRC37A2  | -5.208  | -0.005      | 1.91E-07 | 0.621      | 0.622 | 1.44E-23  | 79    | 79      | 79         |          | ypothalamus        |
| CRHR1-IT1 | -5.189  | -0.011      | 2.12E-07 | 0.190      | 0.183 | 4.73E-08  | 26    | 26      | 26         |          | cerebellum         |
| LRRC37A2  | -5.170  | -0.007      | 2.34E-07 | 0.317      | 0.510 | 3.58E-18  | 32    | 32      | 32         |          | rontal cortex      |
| FMNL1     | 5.159   | 0.009       | 2.48E-07 | 0.223      | 0.292 | 7.06E-13  | 374   | 374     | 374        |          | cerebellum         |

|           |        |        |          |       |       |          |    |    |    |                     |
|-----------|--------|--------|----------|-------|-------|----------|----|----|----|---------------------|
| CRHR1-IT1 | -5.158 | -0.008 | 2.50E-07 | 0.254 | 0.266 | 2.01E-08 | 28 | 28 | 28 | ypothalamus         |
| RRC37A17  | 5.152  | 0.020  | 2.58E-07 | 0.047 | 0.085 | 7.74E-04 | 16 | 16 | 16 | cerebellum          |
| RRC37A4   | 5.148  | 0.005  | 2.64E-07 | 0.614 | 0.606 | 1.13E-23 | 55 | 56 | 56 | rontal cortex       |
| MAMSTR    | 5.146  | 0.022  | 2.66E-07 | 0.034 | 0.133 | 2.26E-04 | 18 | 18 | 18 | ypothalamus         |
| ARL17A    | -5.143 | -0.006 | 2.71E-07 | 0.440 | 0.454 | 6.32E-14 | 52 | 52 | 52 | ypothalamus         |
| LRRC37A2  | -5.131 | -0.006 | 2.89E-07 | 0.575 | 0.674 | 1.12E-33 | 41 | 42 | 42 | cortex              |
| P11-360F5 | -5.110 | -0.009 | 3.21E-07 | 0.158 | 0.251 | 2.31E-10 | 47 | 47 | 47 | cerebellum          |
| P11-360F5 | -5.083 | -0.014 | 3.71E-07 | 0.071 | 0.168 | 8.48E-06 | 26 | 26 | 26 | cortex              |
| FUT2      | 5.075  | 0.028  | 3.88E-07 | 0.018 | 0.049 | 2.11E-02 | 9  | 9  | 9  | us accumbens        |
| DND1P1    | -5.057 | -0.006 | 4.25E-07 | 0.345 | 0.454 | 1.16E-14 | 34 | 35 | 35 | putamen             |
| LRRC37A   | -5.050 | -0.006 | 4.43E-07 | 0.381 | 0.507 | 2.93E-23 | 23 | 23 | 23 | cerebellum          |
| P11-259G1 | -5.032 | -0.006 | 4.86E-07 | 0.385 | 0.499 | 9.02E-16 | 47 | 47 | 47 | ypothalamus         |
| CRHR1-IT1 | -5.022 | -0.008 | 5.13E-07 | 0.266 | 0.413 | 1.04E-12 | 39 | 39 | 39 | ippocampus          |
| ARL17A    | -5.017 | -0.007 | 5.26E-07 | 0.322 | 0.433 | 6.96E-14 | 49 | 50 | 50 | rontal cortex       |
| P11-259G1 | -5.015 | -0.008 | 5.30E-07 | 0.298 | 0.316 | 3.84E-11 | 35 | 35 | 35 | us accumbens        |
| LRP4      | -5.014 | -0.011 | 5.34E-07 | 0.114 | 0.049 | 1.73E-02 | 44 | 44 | 44 | cortex              |
| LRRC37A2  | -5.009 | -0.006 | 5.48E-07 | 0.440 | 0.569 | 6.36E-25 | 37 | 38 | 38 | us accumbens        |
| NTN5      | 5.000  | 0.017  | 5.72E-07 | 0.049 | 0.072 | 9.16E-03 | 5  | 5  | 5  | ypothalamus         |
| P11-707O2 | -4.984 | -0.005 | 6.22E-07 | 0.568 | 0.496 | 4.93E-17 | 49 | 50 | 50 | ir cingulate cortex |
| PLEKHM1   | -4.977 | -0.016 | 6.46E-07 | 0.060 | 0.153 | 7.31E-05 | 12 | 12 | 12 | ir cingulate cortex |
| RFC1      | -4.939 | -0.022 | 7.84E-07 | 0.028 | 0.058 | 5.63E-03 | 30 | 30 | 30 | cerebellum          |
| DND1P1    | -4.939 | -0.009 | 7.87E-07 | 0.206 | 0.203 | 5.84E-08 | 28 | 28 | 28 | cerebellum          |
| P11-259G1 | -4.935 | -0.006 | 8.02E-07 | 0.413 | 0.473 | 1.68E-17 | 45 | 45 | 45 | us accumbens        |
| LRRC37A2  | -4.927 | -0.006 | 8.36E-07 | 0.532 | 0.610 | 3.54E-22 | 56 | 56 | 56 | putamen             |
| SLC39A13  | -4.915 | -0.021 | 8.87E-07 | 0.025 | 0.039 | 3.35E-02 | 5  | 5  | 5  | caudate             |
| NDUFS3    | -4.897 | -0.021 | 9.74E-07 | 0.033 | 0.090 | 3.89E-04 | 33 | 33 | 33 | cerebellum          |
| ARL17A    | -4.885 | -0.008 | 1.03E-06 | 0.265 | 0.353 | 1.92E-10 | 42 | 43 | 43 | putamen             |
| NPIP9     | 4.863  | 0.013  | 1.15E-06 | 0.091 | 0.034 | 3.16E-02 | 24 | 24 | 24 | cerebellum          |
| ARL17A    | -4.845 | -0.008 | 1.26E-06 | 0.252 | 0.409 | 2.15E-16 | 22 | 23 | 23 | caudate             |
