# Supplementary material
Source: PubMed Central journal article supplement (PMC6365681)
Supplement: NIHMS1510361-supplement-supp_table_20.pdf [file NIHMS1510361-supplement-supp_table_20.pdf]

**Supplementary Table 20.** Bonferroni significant results of gene-based association analyses for the GWAS meta-analysis of AUDIT-P

| Gene name   | Z score | Effect size | P value  | expression | ctd      | perfoctd | perfo | Ps used | ( covarian | Ps model   | rain tissue |
|-------------|---------|-------------|----------|------------|----------|----------|-------|---------|------------|------------|-------------|
| <i>RFC1</i> | -4.81   | -2.25E-02   | 1.54E-06 | 0.12       | 2.18E-01 | 4.26E-07 | 54    | 54      | 54         | hemisphere |             |
