# Supplementary material
Source: PubMed Central journal article supplement (PMC6365681)
Supplement: NIHMS1510361-supplement-suppl_table_9.pdf [file NIHMS1510361-supplement-suppl_table_9.pdf]

**Supplementary Table 9.** Genome-wide significant associations ( $P < 5 \times 10^{-8}$ ) between SNPs and AUDIT Total Score (UKB) ordered by chromosomal location

| Chromosome | rsID       | Gene            | A1 | AUDIT Total Score (UKB) |                       | Conditional on rs1229984 |                       |
|------------|------------|-----------------|----|-------------------------|-----------------------|--------------------------|-----------------------|
|            |            |                 |    | Beta (S.E.)             | P                     | Beta (S.E.)              | P                     |
| 2p23.3     | rs1260326  | <i>GCKR</i>     | C  | .008 (0.00)             | $2.1 \times 10^{-10}$ | 0.008 (0.001)            | $1.1 \times 10^{-10}$ |
| 2p21       | rs4953148  | <i>C01833/S</i> | T  | .007 (0.00)             | $2.8 \times 10^{-8}$  | 0.007 (0.001)            | $2.3 \times 10^{-8}$  |
| 4p14       | rs1194069  | <i>KLB</i>      | G  | .01 (0.00)              | $9.8 \times 10^{-20}$ | 0.01 (0.001)             | $5.9 \times 10^{-20}$ |
| 4p14       | rs1215270  | <i>KLB</i>      | T  | .008 (0.00)             | $1.9 \times 10^{-8}$  | 0.008 (0.001)            | $1.4 \times 10^{-8}$  |
| 4q23       | rs1229984  | <i>ADH1B</i>    | C  | .06 (0.00)              | $9.4 \times 10^{-72}$ |                          |                       |
| 4q23       | rs14678803 | <i>METAP1</i>   | G  | .044 (0.00)             | $1.5 \times 10^{-22}$ | 0.0001 (0.004)           | 0.98                  |
| 4q23       | rs1173369  | <i>ADH6</i>     | A  | 0.07 (0.00)             | $9.1 \times 10^{-26}$ | -0.006 (0.007)           | 0.39                  |
| 4q23       | rs3114045  | <i>H1C/ADH</i>  | C  | .01 (0.00)              | $3.4 \times 10^{-10}$ | 0.0008 (0.001)           | 0.63                  |
| 4q24       | rs1310732  | <i>SLC39A8</i>  | T  | 0.02 (0.00)             | $2.9 \times 10^{-13}$ | -0.02 (0.002)            | $7.9 \times 10^{-13}$ |
| 11p11.2    | rs7934481  | <i>NUP160</i>   | T  | .008 (0.00)             | $2.0 \times 10^{-9}$  | 0.008 (0.001)            | $1.2 \times 10^{-9}$  |
| 17q21.31   | rs6206228  | <i>MAPT</i>     | A  | .009 (0.00)             | $1.6 \times 10^{-9}$  | -0.009 (0.001)           | $1.6 \times 10^{-9}$  |
| 22q13.2    | rs9607805  | <i>PHF5A</i>    | T  | .007 (0.00)             | $3.6 \times 10^{-8}$  | 0.007 (0.001)            | $3.7 \times 10^{-8}$  |

Genes are listed if located within +/- 10 kb of a listed SNP. A1=effect allele
