# Supplementary material
Source: PubMed Central journal article supplement (PMC6365681)
Supplement: NIHMS1510361-supplement-suppl_table_13.pdf [file NIHMS1510361-supplement-suppl_table_13.pdf]

Supplementary Table 13. Credible set results associated with AUDIT total scores in the GWAS meta-analysis, and functional annotation of the candidate SNPs in the credible region

| SNP         | chr | bp        | A1 | A2 | MAF  | Z        | P        | inCredible | probNorm | cumSum    | lead SNP  | GenomicLocus | nearestGene | distance   | func       | CADD  | RDB | minimum_Chromatin_State |  |
|-------------|-----|-----------|----|----|------|----------|----------|------------|----------|-----------|-----------|--------------|-------------|------------|------------|-------|-----|-------------------------|--|
| rs1260326   | 2   | 2774100   | t  | c  | 0.41 | -7.73    | 1.02E-12 | 1          | 0.083    | 0.639     | rs1260326 | 1            | GCKR        | 0          | exonic     | 0.31  | 5   | 5                       |  |
| rs780093    | 2   | 27742603  | t  | c  | 0.41 | -6.91    | 4.72E-12 | 1          | 0.152    | 0.835     | rs1260326 | 1            | GCKR        | 0          | intronic   | 1.82  | 5   | 1                       |  |
| rs780094    | 2   | 27741237  | t  | c  | 0.41 | -6.86    | 6.69E-12 | 1          | 0.108    | 0.943     | rs1260326 | 1            | GCKR        | 0          | intronic   | 2.07  | 2c  | 4                       |  |
| rs4665972   | 2   | 27598097  | t  | c  | 0.42 | -6.77    | 1.32E-11 | 1          | 0.056    | 0.999     | rs1260326 | 1            | SNX17       | 0          | intronic   | 0.71  | 7   | 4                       |  |
| rs1127048   | 2   | 27752463  | a  | g  | 0.76 | 1.34E-11 | 1        | 0.045      | 0.999    | rs1260326 | 1         | GCKR         | 5913        | intergenic |            |       |     |                         |  |
| rs4953148   | 2   | 45152522  | a  | t  | 0.31 | -5.59    | 2.31E-08 | 1          | 0.159    | 0.159     | rs4953148 | 2            | LINC01833   | 0          | RNA_intron | 4.78  | 6   | 5                       |  |
| rs13383034  | 2   | 45155276  | t  | c  | 0.31 | -5.40    | 3.02E-08 | 1          | 0.124    | 0.283     | rs4953148 | 2            | LINC01833   | 0          | RNA_intron | 8.12  | 4   | 1                       |  |
| rs538543    | 2   | 45153287  | c  | g  | 0.34 | 5.54     | 3.11E-08 | 1          | 0.120    | 0.403     | rs4953148 | 2            | LINC01833   | 0          | RNA_intron | 0.43  | 5   | 5                       |  |
| rs7568987   | 2   | 45154229  | a  | g  | 0.31 | -5.53    | 3.29E-08 | 1          | 0.114    | 0.516     | rs4953148 | 2            | LINC01833   | 0          | RNA_intron | 0.02  | 4   | 5                       |  |
| rs549814    | 2   | 45153508  | t  | c  | 0.34 | 5.49     | 4.10E-08 | 1          | 0.092    | 0.608     | rs4953148 | 2            | LINC01833   | 0          | RNA_intron | 2.95  | 7   | 5                       |  |
| rs504675    | 2   | 45154689  | t  | c  | 0.37 | 5.46     | 4.74E-08 | 1          | 0.084    | 0.692     | rs4953148 | 2            | LINC01833   | 0          | RNA_intron | 15.53 | NA  | 5                       |  |
| rs72794102  | 2   | 45151600  | a  | c  | 0.33 | 5.43     | 5.56E-08 | 1          | 0.007    | 0.759     | rs4953148 | 2            | LINC01833   | 0          | RNA_intron | 5.88  | 7   | 5                       |  |
| rs7569203   | 2   | 45154418  | a  | c  | 0.31 | -5.43    | 5.73E-08 | 1          | 0.066    | 0.825     | rs4953148 | 2            | LINC01833   | 0          | RNA_intron | 0.00  | 2b  | 5                       |  |
| rs504764    | 2   | 45154662  | t  | c  | 0.34 | 5.37     | 7.99E-08 | 1          | 0.048    | 0.923     | rs4953148 | 2            | LINC01833   | 0          | RNA_intron | 16.24 | NA  | 5                       |  |
| rs13386862  | 2   | 45156324  | a  | g  | 0.31 | 5.37     | 7.99E-08 | 1          | 0.050    | 0.875     | rs4953148 | 2            | LINC01833   | 0          | RNA_intron | 8.51  | 2b  | 1                       |  |
| rs494904    | 2   | 45141180  | t  | c  | 0.41 | -5.12    | 3.04E-07 | 1          | 0.015    | 0.938     | rs4953148 | 2            | LINC01833   | 6152       | intergenic | 1.43  | 7   | 5                       |  |
| rs1629802   | 2   | 45138179  | a  | g  | 0.38 | 5.12     | 3.12E-07 | 1          | 0.014    | 0.952     | rs4953148 | 2            | LINC01833   | 9153       | intergenic | 2.52  | 6   | 8                       |  |
| rs567897    | 2   | 45139153  | a  | g  | 0.42 | -5.09    | 3.60E-07 | 1          | 0.012    | 0.964     | rs4953148 | 2            | LINC01833   | 8179       | intergenic | 11.48 | 7   | 9                       |  |
| rs4953150   | 2   | 45157336  | t  | c  | 0.34 | 5.05     | 4.49E-07 | 1          | 0.010    | 0.974     | rs4953148 | 2            | LINC01833   | 0          | rNA_exon   | 12.63 | 4   | 1                       |  |
| rs4953149   | 2   | 45157307  | t  | c  | 0.34 | -5.02    | 5.07E-07 | 1          | 0.009    | 0.982     | rs4953148 | 2            | LINC01833   | 0          | rNA_exon   | 13.31 | 4   | 1                       |  |
| rs501964    | 2   | 45138941  | t  | c  | 0.35 | 4.98     | 6.38E-07 | 1          | 0.007    | 0.989     | rs4953148 | 2            | LINC01833   | 8391       | intergenic | 1.09  | NA  | 9                       |  |
| rs540395    | 2   | 45138444  | a  | c  | 0.42 | -4.93    | 8.11E-07 | 1          | 0.006    | 0.995     | rs4953148 | 2            | LINC01833   | 8888       | intergenic | 2.80  | 5   | 8                       |  |
| rs1920650   | 3   | 16035568  | t  | c  | a    | -5.64    | 1.72E-08 | 1          | 0.142    | 0.142     | rs1920650 | 3            | RPL6P8      | 32012      | intergenic | 7.53  | 4   | 2                       |  |
| rs4679003   | 3   | 16032866  | t  | c  | a    | 5.40     | 6.68E-08 | 1          | 0.023    | 0.679     | rs1920650 | 3            | RPL6P8      | 24992      | intergenic | 2.22  | 5   | 5                       |  |
| rs13065269  | 3   | 160352319 | a  | c  | a    | 5.38     | 7.50E-08 | 1          | 0.034    | 0.213     | rs1920650 | 3            | ARL14       | 42628      | intergenic | 3.25  | 7   | 7                       |  |
| rs2141668   | 3   | 160336032 | a  | g  | a    | 5.37     | 7.73E-08 | 1          | 0.033    | 0.246     | rs1920650 | 3            | RPL6P8      | 32456      | intergenic | 12.87 | 5   | 2                       |  |
| rs2178451   | 3   | 160335836 | a  | g  | a    | 5.37     | 7.82E-08 | 1          | 0.033    | 0.278     | rs1920650 | 3            | RPL6P8      | 32260      | intergenic | 1.23  | 5   | 5                       |  |
| rs7365871   | 3   | 160357685 | t  | c  | a    | -5.37    | 7.85E-08 | 1          | 0.032    | 0.311     | rs1920650 | 3            | ARL14       | 37262      | intergenic | 1.51  | 6   | 5                       |  |
| rs3503870   | 3   | 16034317  | t  | c  | a    | 5.37     | 8.08E-08 | 1          | 0.032    | 0.342     | rs1920650 | 3            | RPL6P8      | 30741      | intergenic | 0.22  | 5   | 5                       |  |
| rs6784067   | 3   | 160394152 | t  | c  | a    | -5.36    | 8.25E-08 | 1          | 0.031    | 0.373     | rs1920650 | 3            | ARL14       | 795        | upstream   | 0.25  | 7   | 5                       |  |
| rs1920638   | 3   | 160345169 | a  | g  | a    | -5.36    | 8.30E-08 | 1          | 0.031    | 0.404     | rs1920650 | 3            | RPL6P8      | 41593      | intergenic | 3.88  | 6   | 14                      |  |
| rs4679904   | 3   | 160340896 | t  | c  | a    | 5.36     | 8.31E-08 | 1          | 0.031    | 0.435     | rs1920650 | 3            | RPL6P8      | 37320      | intergenic | 1.51  | 7   | 5                       |  |
| rs1263274   | 3   | 160343281 | a  | g  | a    | 5.35     | 8.71E-08 | 1          | 0.029    | 0.464     | rs1920650 | 3            | RPL6P8      | 39705      | intergenic | 1.89  | 7   | 14                      |  |
| rs4679906   | 3   | 16031187  | a  | c  | a    | 5.35     | 8.92E-08 | 1          | 0.029    | 0.493     | rs1920650 | 3            | ARL14       | 43760      | intergenic | 3.70  | 7   | 14                      |  |
| rs4679907   | 3   | 160357401 | t  | c  | a    | 5.35     | 8.97E-08 | 1          | 0.029    | 0.521     | rs1920650 | 3            | ARL14       | 43648      | intergenic | 13.09 | 5   | 14                      |  |
| rs11711447  | 3   | 160349445 | a  | g  | a    | 5.34     | 9.18E-08 | 1          | 0.028    | 0.549     | rs1920650 | 3            | ARL14       | 45502      | intergenic | 1.54  | 7   | 14                      |  |
| rs13074231  | 3   | 160355428 | t  | c  | a    | -5.34    | 9.28E-08 | 1          | 0.028    | 0.577     | rs1920650 | 3            | ARL14       | 39519      | intergenic | 4.91  | 6   | 5                       |  |
| rs11713230  | 3   | 160355942 | t  | g  | a    | 5.34     | 9.54E-08 | 1          | 0.027    | 0.604     | rs1920650 | 3            | ARL14       | 39005      | intergenic | 1.16  | 7   | 5                       |  |
| rs11712392  | 3   | 160355816 | a  | g  | a    | 5.31     | 1.07E-07 | 1          | 0.024    | 0.628     | rs1920650 | 3            | ARL14       | 39131      | intergenic | 0.75  | 6   | 5                       |  |
| rs6788867   | 3   | 160351039 | c  | g  | a    | 5.27     | 1.43E-07 | 1          | 0.019    | 0.659     | rs1920650 | 3            | ARL14       | 4805       | intergenic | 4.99  | 7   | 5                       |  |
| rs1920652   | 3   | 160338342 | a  | g  | a    | 5.26     | 1.45E-07 | 1          | 0.018    | 0.684     | rs1920650 | 3            | RPL6P8      | 34766      | intergenic | 0.97  | 7   | 5                       |  |
| rs9857106   | 3   | 160328827 | t  | c  | a    | -5.25    | 1.52E-07 | 1          | 0.017    | 0.681     | rs1920650 | 3            | RPL6P8      | 25251      | intergenic | 1.69  | 5   | 7                       |  |
| rs4320089   | 3   | 160325458 | a  | g  | a    | 5.25     | 1.56E-07 | 1          | 0.017    | 0.698     | rs1920650 | 3            | RPL6P8      | 21882      | intergenic | 1.93  | 7   | 14                      |  |
| rs6801636   | 3   | 160401080 | t  | c  | a    | -5.24    | 1.61E-07 | 1          | 0.018    | 0.714     | rs1920650 | 3            | ARL14       | 4846       | intergenic | 2.19  | 6   | 5                       |  |
| rs9816525   | 3   | 160331113 | t  | c  | a    | 5.23     | 1.68E-07 | 1          | 0.016    | 0.730     | rs1920650 | 3            | RPL6P8      | 27537      | intergenic | 1.91  | 7   | 5                       |  |
| rs9822862   | 3   | 160332747 | t  | c  | a    | 5.23     | 1.74E-07 | 1          | 0.015    | 0.745     | rs1920650 | 3            | RPL6P8      | 29173      | intergenic | 1.51  | 7   | 5                       |  |
| rs6783757   | 3   | 160400562 | a  | c  | a    | -5.22    | 1.79E-07 | 1          | 0.015    | 0.759     | rs1920650 | 3            | ARL14       | 4328       | intergenic | 0.28  | 6   | 5                       |  |
| rs1920649   | 3   | 160334018 | a  | g  | a    | 5.22     | 1.80E-07 | 1          | 0.015    | 0.774     | rs1920650 | 3            | RPL6P8      | 30442      | intergenic | 0.41  | 7   | 5                       |  |
| rs11711457  | 3   | 160349534 | c  | a  | a    | -5.21    | 1.88E-07 | 1          | 0.014    | 0.788     | rs1920650 | 3            | ARL14       | 45413      | intergenic | 0.67  | 7   | 14                      |  |
| rs6786429   | 3   | 160400655 | c  | g  | a    | 5.16     | 2.50E-07 | 1          | 0.011    | 0.799     | rs1920650 | 3            | ARL14       | 4421       | intergenic | 0.01  | 5   | 5                       |  |
| rs6783882   | 3   | 160350751 | t  | c  | a    | -5.15    | 2.60E-07 | 1          | 0.011    | 0.815     | rs1920650 | 3            | ARL14       | 4517       | intergenic | 13.45 | 5   | 5                       |  |
| rs1920656   | 3   | 160367991 | t  | c  | a    | 5.13     | 2.83E-07 | 1          | 0.009    | 0.818     | rs1920650 | 3            | ARL14       | 26956      | intergenic | 2.98  | 6   | 5                       |  |
| rs11715900  | 3   | 160314436 | t  | c  | a    | -5.11    | 3.24E-07 | 1          | 0.008    | 0.826     | rs1920650 | 3            | RPL6P8      | 10860      | intergenic | 13.08 | 6   | 14                      |  |
| rs7648393   | 3   | 160353328 | a  | g  | a    | 5.11     | 3.29E-07 | 1          | 0.008    | 0.834     | rs1920650 | 3            | ARL14       | 41619      | intergenic | 5.09  | 5   | 5                       |  |
| rs1920659   | 3   | 160352945 | a  | t  | a    | -5.10    | 3.32E-07 | 1          | 0.008    | 0.842     | rs1920650 | 3            | ARL14       | 42002      | intergenic | 4.51  | 7   | 7                       |  |
| rs11711627  | 3   | 160319744 | c  | g  | a    | 5.09     | 3.61E-07 | 1          | 0.007    | 0.850     | rs1920650 | 3            | RPL6P8      | 16168      | intergenic | 0.58  | 5   | 7                       |  |
| rs98020729  | 3   | 160338939 | t  | c  | a    | 5.05     | 6.15E-07 | 1          | 0.005    | 0.855     | rs1920650 | 3            | RPL6P8      | 5392       | intergenic | 11.1  | 6   | 9                       |  |
| rs1920663   | 3   | 160304350 | a  | g  | a    | -5.02    | 5.23E-07 | 1          | 0.005    | 0.860     | rs1920650 | 3            | RPL6P8      | 774        | downstream | 4.73  | 6   | 5                       |  |
| rs114457071 | 3   | 160311740 | a  | g  | a    | 5.01     | 5.45E-07 | 1          | 0.005    | 0.865     | rs1920650 | 3            | RPL6P8      | 8164       | intergenic | 8.84  | 7   | 9                       |  |
| rs7644186   | 3   | 160304472 | a  | c  | a    | 5.01     | 5.50E-07 | 1          | 0.005    | 0.870     | rs1920650 | 3            | RPL6P8      | 496        | downstream | 6.07  | 7   | 5                       |  |
| rs7923293   | 3   | 160204076 | t  | g  | a    | 4.98     | 6.43E-07 | 1          | 0.004    | 0.874     | rs1920650 | 3            | KN4A4       | 0          | intronic   | 1.43  | 7   | 4                       |  |
| rs4679892   | 3   | 160354286 | a  | g  | a    | 4.97     | 6.55E-07 | 1          | 0.004    | 0.879     | rs1920650 | 3            | KN4A4       | 0          | intronic   | 2.63  | 7   | 4                       |  |
| rs17826257  | 3   | 160262803 | t  | c  | a    | 4.97     | 6.57E-07 | 1          | 0.004    | 0.883     | rs1920650 | 3            | KN4A4       | 0          | intronic   | 9     |     |                         |  |

|             |    |           |   |   |       |          |          |       |       |            |             |               |                          |            |            |       |      |    |
|-------------|----|-----------|---|---|-------|----------|----------|-------|-------|------------|-------------|---------------|--------------------------|------------|------------|-------|------|----|
| rs34949451  | 3  | 160381973 | t | g | a     | -4.55    | 5.35E-06 | 1     | 0.001 | 0.987      | rs1920650   | 3             | ARL14                    | 12974      | intergenic | 0.70  | 7    | 5  |
| rs36118017  | 3  | 160383552 | t | c | a     | -4.55    | 5.35E-06 | 1     | 0.001 | 0.988      | rs1920650   | 3             | ARL14                    | 11395      | intergenic | 13.15 | 4    | 1  |
| rs5952700   | 3  | 160282863 | a | g | a     | -4.54    | 5.77E-06 | 1     | 0.001 | 0.987      | rs1920650   | 3             | RP11-432B6.3.SMC4        | 0          | intergenic | 0.41  | 6    | 4  |
| rs4679886   | 3  | 160155047 | t | c | a     | 4.54     | 5.84E-06 | 1     | 0.001 | 0.989      | rs1920650   | 3             | RP11-432B6.3.TRIM59      | 0          | UTR3       | 3.17  | 6    | 4  |
| rs10923     | 3  | 160152696 | a | g | a     | 4.53     | 5.87E-06 | 1     | 0.001 | 0.990      | rs1920650   | 3             | RP11-432B6.3.SMC4:TRIM59 | 0          | UTR3       | 0.91  | 6    | 4  |
| rs11719750  | 3  | 160152770 | t | c | a     | -4.53    | 5.99E-06 | 1     | 0.000 | 0.990      | rs1920650   | 3             | RP11-432B6.3.TRIM59      | 0          | UTR3       | 2.10  | 6    | 4  |
| rs4679660   | 3  | 160380104 | t | c | a     | -4.53    | 6.12E-06 | 1     | 0.000 | 0.990      | rs1920650   | 3             | ARL14                    | 14843      | intergenic | 0.90  | 6    | 5  |
| rs11940694  | 4  | 39414993  | a | g | 0.39  | -9.38    | 6.83E-21 | 1     | 0.862 | 0.662      | rs11940694  | 4             | KLB                      | 0          | intergenic | 3.10  | 4    | 1  |
| rs28712821  | 4  | 39423780  | a | g | 0.39  | 5.71     | 1.61E-10 | 1     | 0.286 | 0.948      | rs1940694   | 4             | KLB                      | 0          | intergenic | 0.01  | 7    | 1  |
| rs12639940  | 4  | 39420981  | a | g | 0.38  | 8.96     | 3.21E-19 | 1     | 0.013 | 0.981      | rs11940694  | 4             | KLB                      | 0          | intergenic | 6.34  | 5    | 5  |
| rs13130794  | 4  | 39422242  | t | c | 0.38  | 8.92     | 4.69E-19 | 1     | 0.009 | 0.970      | rs11940694  | 4             | KLB                      | 0          | intergenic | 8.38  | 7    | 5  |
| rs13125440  | 4  | 39422324  | a | g | 0.38  | 8.91     | 5.00E-19 | 1     | 0.009 | 0.978      | rs11940694  | 4             | KLB                      | 0          | intergenic | 3.23  | 5    | 5  |
| rs13146907  | 4  | 39425248  | a | g | 0.37  | 8.90     | 5.60E-19 | 1     | 0.007 | 0.993      | rs11940694  | 4             | KLB                      | 0          | intergenic | 2.73  | 6    | 5  |
| rs35520052  | 4  | 39428965  | a | g | 0.38  | -9.50    | 5.70E-19 | 1     | 0.008 | 0.986      | rs11940694  | 4             | KLB                      | 0          | intergenic | 3.52  | 6    | 5  |
| rs2045330   | 4  | 39413861  | a | c | 0.38  | -8.79    | 1.14E-11 | 1     | 0.893 | 0.893      | rs2046330   | 4             | KLB                      | 0          | intergenic | 0.99  | 1    | 1  |
| rs9991733   | 4  | 39420994  | a | g | 0.38  | -6.28    | 3.48E-10 | 1     | 0.032 | 0.925      | rs2046330   | 4             | KLB                      | 0          | intergenic | 3.53  | 5    | 5  |
| rs7674434   | 4  | 39419409  | t | g | 0.38  | -6.27    | 3.52E-10 | 1     | 0.031 | 0.956      | rs2046330   | 4             | KLB                      | 0          | intergenic | 10.76 | 7    | 5  |
| rs10030384  | 4  | 39419229  | a | t | 0.38  | -6.19    | 5.91E-10 | 1     | 0.019 | 0.975      | rs2046330   | 4             | KLB                      | 0          | intergenic | 0.04  | 6    | 5  |
| rs6836420   | 4  | 39418192  | a | g | 0.37  | 6.07     | 1.24E-09 | 1     | 0.009 | 0.984      | rs2046330   | 4             | KLB                      | 0          | intergenic | 6.86  | 6    | 5  |
| rs7379281   | 4  | 39292118  | t | c | 0.36  | 6.06     | 1.34E-09 | 1     | 0.009 | 0.992      | rs2046330   | 4             | KLB                      | 0          | intergenic | 1.29  | 6    | 5  |
| rs146788033 | 4  | 99941138  | a | g | 0.01  | 10.48    | 1.03E-25 | 1     | 1.000 | 1.000      | rs146788033 | 5             | METAP1                   | 0          | intergenic | 11.4  | 5.00 | 4  |
| rs1733695   | 4  | 100122916 | a | g | 0.01  | -11.42   | 3.37E-20 | 1     | 1.000 | 1.000      | rs1733695   | 5             | RP11-696N14.1            | 0          | RNA_intron | 3.02  | 2b   | 5  |
| rs188514326 | 4  | 101182767 | g | c | 0.01  | -5.49    | 4.08E-08 | 1     | 1.000 | 1.000      | rs188514326 | 5             | RP11-588PB.1             | 46104      | intergenic | 0.60  | 5    | 7  |
| rs3114045   | 4  | 100252560 | t | c | 0.13  | -7.18    | 7.19E-13 | 1     | 0.742 | 0.742      | rs13849551  | 5             | ADH1C                    | 5089       | intergenic | 0.28  | 7    | 5  |
| rs7692041   | 4  | 100286539 | t | c | 0.08  | -6.78    | 1.19E-11 | 1     | 0.052 | 0.794      | rs13849551  | 5             | ADH1C                    | 12355      | intergenic | 0.30  | 6    | 5  |
| rs4995743   | 4  | 100282103 | a | g | 0.08  | -6.78    | 1.19E-11 | 1     | 0.052 | 0.794      | rs13849551  | 5             | ADH1C                    | 7919       | intergenic | 0.61  | 6    | 5  |
| rs11405931  | 4  | 100281304 | a | c | 0.08  | -6.76    | 1.42E-11 | 1     | 0.044 | 0.890      | rs13849551  | 5             | ADH1C                    | 7210       | intergenic | 9.48  | 6    | 5  |
| rs113659074 | 4  | 100252308 | t | c | 0.08  | -6.63    | 3.32E-11 | 1     | 0.019 | 0.909      | rs13849551  | 5             | ADH1C                    | 5341       | intergenic | 0.02  | 6    | 5  |
| rs113909752 | 4  | 100281067 | t | c | 0.08  | -6.60    | 4.14E-11 | 1     | 0.016 | 0.925      | rs13849551  | 5             | ADH1C                    | 6883       | intergenic | 3.73  | 5    | 5  |
| rs1837934   | 4  | 100289984 | a | g | 0.08  | -6.56    | 5.40E-11 | 1     | 0.012 | 0.948      | rs13849551  | 5             | ADH1C                    | 15800      | intergenic | 6.93  | NA   | 14 |
| rs6532815   | 4  | 100287156 | a | g | 0.08  | 6.56     | 5.42E-11 | 1     | 0.012 | 0.937      | rs13849551  | 5             | ADH1C                    | 0          | intergenic | 0.49  | 6    | 5  |
| rs34761493  | 4  | 100283110 | a | g | 0.08  | -6.56    | 5.85E-11 | 1     | 0.012 | 0.980      | rs13849551  | 5             | ADH1C                    | 0          | intergenic | 0.51  | NA   | 14 |
| rs115179961 | 4  | 100281145 | t | c | 0.08  | -6.54    | 6.30E-11 | 1     | 0.010 | 0.970      | rs13849551  | 5             | ADH1C                    | 6961       | intergenic | 0.09  | 5    | 5  |
| rs72681920  | 4  | 100290279 | a | g | 0.08  | -6.54    | 6.31E-11 | 1     | 0.010 | 0.991      | rs13849551  | 5             | ADH1C                    | 16095      | intergenic | 2.49  | 5    | 14 |
| rs147851155 | 4  | 100282262 | a | g | 0.08  | -6.54    | 6.35E-11 | 1     | 0.010 | 0.980      | rs13849551  | 5             | ADH1C                    | 8078       | intergenic | 7.33  | 7    | 5  |
| rs13135992  | 4  | 103198082 | a | g | 0.09  | 7.59     | 3.20E-14 | 1     | 0.411 | 0.411      | rs13135992  | 6             | SLC39A8                  | 0          | intergenic | 10.30 | 6    | 5  |
| rs13107325  | 4  | 103189709 | t | c | 0.08  | -7.53    | 5.25E-14 | 1     | 0.264 | 0.675      | rs13135992  | 6             | SLC39A8                  | 0          | exonic     | 34.00 | 5    | 4  |
| rs35225200  | 4  | 103146888 | a | g | 0.09  | 7.46     | 8.44E-14 | 1     | 0.158 | 0.833      | rs13135992  | 6             | SLC39A8                  | 25310      | intergenic | 1.26  | 7    | 9  |
| rs35518360  | 4  | 103146890 | a | t | 0.09  | 7.46     | 9.01E-14 | 1     | 0.148 | 0.981      | rs13135992  | 6             | SLC39A8                  | 25308      | intergenic | 0.15  | 7    | 9  |
| rs3433163   | 4  | 103283117 | a | g | 0.08  | 7.05     | 1.81E-12 | 1     | 0.008 | 0.989      | rs13135992  | 6             | RN7SL728P                | 13269      | intergenic | 3.13  | 7    | 5  |
| rs13105581  | 4  | 103228830 | t | c | 0.08  | -7.00    | 2.61E-12 | 1     | 0.005 | 0.994      | rs13135992  | 6             | SLC39A8                  | 0          | intergenic | 8.63  | 7    | 4  |
| rs35040843  | 8  | 93309497  | t | c | 5.55  | 2.91E-07 | 1        | 0.344 | 0.344 | rs35040843 | 8           | RP11-700E23.3 | 22642                    | intergenic | 0.59       | 6     | 9    |    |
| rs13259661  | 8  | 93345300  | a | c | 5.55  | 2.04E-07 | 1        | 0.052 | 0.396 | rs35040843 | 8           | RP11-700E23.3 | 18835                    | intergenic | 1.16       | 6     | 9    |    |
| rs4259387   | 8  | 93366290  | a | g | 5.19  | 2.10E-07 | 1        | 0.051 | 0.447 | rs35040843 | 8           | RP11-700E23.3 | 1913                     | intergenic | 0.12       | 7     | 9    |    |
| rs11775918  | 8  | 93299275  | a | g | -5.16 | 2.44E-07 | 1        | 0.044 | 0.491 | rs35040843 | 8           | RP11-700E23.3 | 64864                    | intergenic | 1.24       | 7     | 14   |    |
| rs7830355   | 8  | 93309479  | t | c | -5.13 | 2.91E-07 | 1        | 0.037 | 0.528 | rs35040843 | 8           | RP11-700E23.3 | 54660                    | intergenic | 8.96       | 6     | 7    |    |
| rs4565373   | 8  | 93339099  | a | t | -5.12 | 3.06E-07 | 1        | 0.035 | 0.563 | rs35040843 | 8           | RP11-700E23.3 | 33230                    | intergenic | 7.32       | 7     | 9    |    |
| rs71530232  | 8  | 93356230  | a | c | 5.11  | 3.23E-07 | 1        | 0.034 | 0.571 | rs35040843 | 8           | RP11-700E23.3 | 34832                    | intergenic | 0.01       | 7     | 9    |    |
| rs35606437  | 8  | 93327532  | a | g | 5.11  | 3.23E-07 | 1        | 0.033 | 0.631 | rs35040843 | 8           | RP11-700E23.3 | 36607                    | intergenic | 2.67       | 7     | 9    |    |
| rs35808086  | 8  | 93336734  | t | c | 5.11  | 3.26E-07 | 1        | 0.033 | 0.684 | rs35040843 | 8           | RP11-700E23.3 | 27405                    | intergenic | 7.57       | 6     | 15   |    |
| rs35803447  | 8  | 93323053  | t | c | 5.10  | 3.32E-07 | 1        | 0.033 | 0.696 | rs35040843 | 8           | RP11-700E23.3 | 41086                    | intergenic | 3.42       | 6     | 9    |    |
| rs13281878  | 8  | 93318607  | t | c | 5.10  | 3.34E-07 | 1        | 0.032 | 0.729 | rs35040843 | 8           | RP11-700E23.3 | 45532                    | intergenic | 0.51       | 7     | 9    |    |
| rs3431424   | 8  | 93301977  | c | g | 5.10  | 3.39E-07 | 1        | 0.032 | 0.761 | rs35040843 | 8           | RP11-700E23.3 | 62262                    | intergenic | 0.38       | 7     | 15   |    |
| rs34898771  | 8  | 93303861  | a | g | 5.10  | 3.40E-07 | 1        | 0.032 | 0.793 | rs35040843 | 8           | RP11-700E23.3 | 60278                    | intergenic | 12.52      | 7     | 15   |    |
| rs6991228   | 8  | 93325492  | t | c | -5.10 | 3.41E-07 | 1        | 0.032 | 0.824 | rs35040843 | 8           | RP11-700E23.3 | 38647                    | intergenic | 1.71       | 7     | 9    |    |
| rs17748359  | 8  | 93291163  | a | c | -5.08 | 3.81E-07 | 1        | 0.029 | 0.853 | rs35040843 | 8           | RP11-700E23.3 | 72976                    | intergenic | 15.27      | 7     | 9    |    |
| rs7843008   | 8  | 93317204  | t | c | -5.08 | 3.86E-07 | 1        | 0.028 | 0.881 | rs35040843 | 8           | RP11-700E23.3 | 48935                    | intergenic | 1.52       | 5     | 7    |    |
| rs143695991 | 8  | 93321871  | a | g | 5.04  | 4.66E-07 | 1        | 0.023 | 0.905 | rs35040843 | 8           | RP11-700E23.3 | 46935                    | intergenic | 1.52       | 5     | 7    |    |
| rs1373527   | 8  | 93281788  | a | g | 4.93  | 4.81E-07 | 1        | 0.013 | 0.918 | rs35040843 | 8           | RP11-700E23.3 | 76754                    | intergenic | 1.74       | 6     | 9    |    |
| rs17748165  | 8  | 93268727  | a | g | -4.88 | 1.06E-06 | 1        | 0.011 | 0.929 | rs35040843 | 8           | RP11-700E23.3 | 77412                    | intergenic | 1.22       | 6     | 9    |    |
| rs76203758  | 8  | 93373516  | a | g | -4.87 | 1.12E-06 | 1        | 0.010 | 0.939 | rs35040843 | 8           | RP11-700E23.3 | 9139                     | intergenic | 0.27       | 6     | 9    |    |
| rs17748153  | 8  | 93284681  | t | c | 4.81  | 1.49E-06 | 1        | 0.008 | 0.946 | rs35040843 | 8           | RP11-700E23.3 | 79458                    | intergenic | 11.67      | 4     | 1    |    |
| rs1480889   | 8  | 93355038  | t | c | 4.80  | 1.56E-06 | 1        | 0.007 | 0.954 | rs35040843 | 8           | RP11-700E23.3 | 9101                     | intergenic | 0.84       | 7     | 9    |    |
| rs9993812   | 8  | 93360143  | t | c | -4.79 | 1.69E-06 | 1        | 0.007 | 0.961 | rs35040843 | 8           | RP11-700E23.3 | 3996                     | intergenic | 4.78       | 6     | 5    |    |
| rs4297019   | 8  | 93366286  | a | g | -4.78 | 1.77E-06 | 1        | 0.007 | 0.971 | rs35040843 | 8           | RP11-700E23.3 | 1863                     | intergenic | 2.87       | 6     | 9    |    |
| rs4149791   | 8  | 93367913  | c | g | -4.78 | 1.77E-06 | 1        | 0.007 | 0.974 | rs35040843 | 8           | RP11-700E23.3 | 3536                     | intergenic | 1.91       | 6     | 9    |    |
| rs13274294  | 8  | 93277429  | t | c | 4.71  | 2.49E-06 | 1        | 0.005 | 0.978 | rs35040843 | 8           | RP11-700E23.3 | 86710                    | intergenic | 2.60       | 6     | 9    |    |
| rs35348516  | 8  | 93273639  | a | g | 4.71  | 2.51E-06 | 1        | 0.005 | 0.983 | rs35040843 | 8           | RP11-700E23.3 | 90500                    | intergenic | 1.78       | 6     | 15   |    |
| rs35442472  | 8  | 93384426  | t | c | 4.65  | 3.41E-06 | 1        | 0.003 | 0.986 | rs35040843 | 8           | RP11-700E23.3 | 20049                    | intergenic | 12.86      | 4     | 2    |    |
| rs12673529  | 8  | 93356426  | a | g | 4.64  | 3.42E-06 | 1        | 0.003 | 0.987 | rs35040843 | 8           | RP11-700E23.3 | 69872                    | intergenic | 2.88       | 6     | 9    |    |
| rs13263731  | 8  | 93267443  | a | t | -4.61 | 4.12E-06 | 1        | 0.003 | 0.993 | rs35040843 | 8           | RP11-700E23.3 | 96566                    | intergenic | 3.40       | 7     | 5    |    |
| rs7078436   | 10 | 30378863  | a | g | 0.32  | 5.74     | 9.58E-09 | 1     | 0.132 | 0.132      | rs7078436   | 8             | JCAD                     | 0          | intergenic | 3.79  | 6    | 5  |
| rs4749528   | 10 | 30376771  | t | c |       |          |          |       |       |            |             |               |                          |            |            |       |      |    |



|             |    |          |   |   |       |          |   |       |       |              |   |        |   |          |      |    |   |
|-------------|----|----------|---|---|-------|----------|---|-------|-------|--------------|---|--------|---|----------|------|----|---|
| rs62061809  | 17 | 44178839 | t | c | 5.75  | 9.08E-09 | 1 | 0.001 | 0.191 | rs62062288   | 9 | KANSL1 | 0 | intronic | 1.02 | 4  | 1 |
| rs17660847  | 17 | 44189373 | t | c | -5.75 | 9.09E-09 | 1 | 0.001 | 0.192 | rs62062288   | 9 | KANSL1 | 0 | intronic | 1.49 | 6  | 5 |
| rs17576695  | 17 | 44123227 | a | t | -5.75 | 9.09E-09 | 1 | 0.001 | 0.193 | rs62062288   | 9 | KANSL1 | 0 | intronic | 3.49 | 6  | 4 |
| rs62063671  | 17 | 44124837 | a | g | 5.75  | 9.10E-09 | 1 | 0.001 | 0.194 | rs62062288   | 9 | KANSL1 | 0 | intronic | 1.52 | 7  | 4 |
| rs17573607  | 17 | 44083081 | a | g | -5.75 | 9.11E-09 | 1 | 0.001 | 0.195 | rs62062288   | 9 | MAPT   | 0 | intronic | 2.48 | 6  | 4 |
| rs17576842  | 17 | 44179992 | a | g | 5.75  | 9.12E-09 | 1 | 0.001 | 0.197 | rs62062288   | 9 | KANSL1 | 0 | intronic | 2.99 | 1f | 2 |
| rs1987151   | 17 | 44156181 | a | t | -5.75 | 9.13E-09 | 1 | 0.001 | 0.198 | rs62062288   | 9 | KANSL1 | 0 | intronic |      |    |   |
| rs62063781  | 17 | 44086991 | t | g | -5.75 | 9.15E-09 | 1 | 0.001 | 0.199 | rs62062288   | 9 | MAPT   | 0 | intronic |      |    |   |
| rs62061818  | 17 | 44182917 | c | g | 5.75  | 9.17E-09 | 1 | 0.001 | 0.200 | rs62062288   | 9 | KANSL1 | 0 | intronic | 1.38 | 6  | 4 |
| rs62061858  | 17 | 44200333 | t | c | 5.75  | 9.18E-09 | 1 | 0.001 | 0.201 | rs62062288   | 9 | KANSL1 | 0 | intronic |      |    |   |
| rs77924366  | 17 | 44182181 | t | c | 5.75  | 9.18E-09 | 1 | 0.001 | 0.202 | rs62062288   | 9 | KANSL1 | 0 | intronic | 0.77 | 5  | 4 |
| rs17576870  | 17 | 44180442 | a | g | 5.75  | 9.20E-09 | 1 | 0.001 | 0.203 | rs62062288   | 9 | KANSL1 | 0 | intronic | 6.47 | 1f | 5 |
| rs62063202  | 17 | 44208945 | t | c | -5.75 | 9.20E-09 | 1 | 0.001 | 0.204 | rs62062288   | 9 | KANSL1 | 0 | intronic | 5.84 | 5  | 2 |
| rs62061810  | 17 | 44178884 | a | g | -5.75 | 9.21E-09 | 1 | 0.001 | 0.206 | rs62062288   | 9 | KANSL1 | 0 | intronic | 3.76 | 2b | 1 |
| rs17576854  | 17 | 44181933 | a | c | 5.75  | 9.21E-09 | 1 | 0.001 | 0.207 | rs62062288   | 9 | KANSL1 | 0 | intronic | 2.22 | 1f | 5 |
| rs17660865  | 17 | 44189408 | t | c | 5.75  | 9.22E-09 | 1 | 0.001 | 0.208 | rs62062288   | 9 | KANSL1 | 0 | intronic | 9.46 | 6  | 5 |
| rs17577877  | 17 | 44208218 | a | g | 5.74  | 9.23E-09 | 1 | 0.001 | 0.209 | rs62062288   | 9 | KANSL1 | 0 | intronic | 5.87 | 1f | 2 |
| rs62061815  | 17 | 44181881 | a | g | 5.74  | 9.23E-09 | 1 | 0.001 | 0.210 | rs62062288   | 9 | KANSL1 | 0 | intronic | 0.81 | 5  | 5 |
| rs17660895  | 17 | 44180954 | a | g | 5.74  | 9.24E-09 | 1 | 0.001 | 0.212 | rs62062288   | 9 | KANSL1 | 0 | intronic | 0.74 | 1f | 5 |
| rs62061812  | 17 | 44180997 | t | c | -5.74 | 9.24E-09 | 1 | 0.001 | 0.211 | rs62062288   | 9 | KANSL1 | 0 | intronic | 8.73 | 4  | 4 |
| rs77788666  | 17 | 44121917 | t | c | -5.74 | 9.24E-09 | 1 | 0.001 | 0.213 | rs62062288   | 9 | KANSL1 | 0 | intronic | 5.67 | 4  | 4 |
| rs17576989  | 17 | 44183616 | a | c | -5.74 | 9.25E-09 | 1 | 0.001 | 0.215 | rs62062288   | 9 | KANSL1 | 0 | intronic | 5.30 | 1f | 4 |
| rs55946323  | 17 | 44031946 | a | g | 5.74  | 9.26E-09 | 1 | 0.001 | 0.216 | rs62062288   | 9 | MAPT   | 0 | intronic | 0.38 | 7  | 5 |
| rs6020809   | 17 | 44172391 | t | c | -5.74 | 9.27E-09 | 1 | 0.001 | 0.217 | rs62062288   | 9 | KANSL1 | 0 | intronic | 2.51 | 7  | 4 |
| rs55903047  | 17 | 44178092 | a | g | -5.74 | 9.27E-09 | 1 | 0.001 | 0.218 | rs62062288   | 9 | KANSL1 | 0 | intronic | 1.44 | 5  | 5 |
| rs62063165  | 17 | 44202147 | a | g | 5.74  | 9.28E-09 | 1 | 0.001 | 0.219 | rs62062288   | 9 | KANSL1 | 0 | intronic | 2.29 | 5  | 5 |
| rs77044307  | 17 | 44172408 | c | g | 5.74  | 9.31E-09 | 1 | 0.001 | 0.220 | rs62062288   | 9 | KANSL1 | 0 | intronic | 0.48 | 6  | 4 |
| rs62063166  | 17 | 44202231 | a | g | 5.74  | 9.31E-09 | 1 | 0.001 | 0.221 | rs62062288   | 9 | KANSL1 | 0 | intronic | 8.55 | 5  | 4 |
| rs62064660  | 17 | 44078832 | a | g | -5.74 | 9.32E-09 | 1 | 0.001 | 0.222 | rs62062288   | 9 | MAPT   | 0 | intronic | 0.72 | 6  | 4 |
| rs11124279  | 17 | 44082181 | a | g | 5.74  | 9.32E-09 | 1 | 0.001 | 0.224 | rs62062288   | 9 | MAPT   | 0 | intronic | 0.09 | 7  | 5 |
| rs56042957  | 17 | 43992244 | a | g | -5.74 | 9.32E-09 | 1 | 0.001 | 0.225 | rs62062288   | 9 | MAPT   | 0 | intronic | 0.70 | 7  | 4 |
| rs55810795  | 17 | 43992283 | a | g | 5.74  | 9.33E-09 | 1 | 0.001 | 0.226 | rs62062288   | 9 | MAPT   | 0 | intronic | 0.05 | 7  | 4 |
| rs6503457   | 17 | 44208312 | t | g | -5.74 | 9.33E-09 | 1 | 0.001 | 0.227 | rs62062288   | 9 | KANSL1 | 0 | intronic | 0.88 | 1f | 2 |
| rs111952388 | 17 | 44181454 | t | c | -5.74 | 9.35E-09 | 1 | 0.001 | 0.228 | rs62062288   | 9 | KANSL1 | 0 | intronic | 2.67 | 6  | 5 |
| rs17661385  | 17 | 44207778 | a | g | 5.74  | 9.37E-09 | 1 | 0.001 | 0.229 | rs62062288   | 9 | KANSL1 | 0 | intronic | 4.08 | 1f | 2 |
| rs77095128  | 17 | 44204304 | t | g | 5.74  | 9.38E-09 | 1 | 0.001 | 0.230 | rs62062288   | 9 | KANSL1 | 0 | intronic | 8.00 | 3a | 4 |
| rs17577052  | 17 | 44189301 | a | c | 5.74  | 9.39E-09 | 1 | 0.001 | 0.231 | rs62062288   | 9 | KANSL1 | 0 | intronic | 2.52 | 1b | 5 |
| rs62061822  | 17 | 44186894 | a | g | 5.74  | 9.41E-09 | 1 | 0.001 | 0.232 | rs62062288   | 9 | KANSL1 | 0 | intronic | 0.61 | 6  | 2 |
| rs62062805  | 17 | 44030773 | a | g | 5.74  | 9.42E-09 | 1 | 0.001 | 0.233 | rs62062288   | 9 | MAPT   | 0 | intronic | 0.96 | 3a | 5 |
| rs62063673  | 17 | 44125484 | t | g | 5.74  | 9.42E-09 | 1 | 0.001 | 0.235 | rs62062288   | 9 | KANSL1 | 0 | intronic | 2.53 | 7  | 4 |
| rs62061845  | 17 | 44190156 | t | c | 5.74  | 9.42E-09 | 1 | 0.001 | 0.236 | rs62062288   | 9 | KANSL1 | 0 | intronic |      |    |   |
| rs17660907  | 17 | 44051088 | a | g | -5.74 | 9.43E-09 | 1 | 0.001 | 0.237 | rs62062288   | 9 | KANSL1 | 0 | intronic | 0.99 | 1f | 5 |
| rs78209533  | 17 | 43989909 | a | g | 5.74  | 9.43E-09 | 1 | 0.001 | 0.238 | rs62062288   | 9 | MAPT   | 0 | intronic | 3.58 | 5  | 4 |
| rs112116311 | 17 | 43989898 | t | g | 5.74  | 9.43E-09 | 1 | 0.001 | 0.239 | rs62062288   | 9 | MAPT   | 0 | intronic | 4.65 | 5  | 4 |
| rs62061823  | 17 | 44188645 | t | c | -5.74 | 9.43E-09 | 1 | 0.001 | 0.240 | rs62062288   | 9 | KANSL1 | 0 | intronic | 2.17 | 7  | 5 |
| rs62061732  | 17 | 44017941 | t | c | -5.74 | 9.44E-09 | 1 | 0.001 | 0.241 | rs62062288   | 9 | MAPT   | 0 | intronic | 0.57 | 4  | 5 |
| rs17577159  | 17 | 44188477 | t | g | 5.74  | 9.45E-09 | 1 | 0.001 | 0.242 | rs62062288   | 9 | KANSL1 | 0 | intronic | 3.85 | 1f | 5 |
| rs41382552  | 17 | 44118995 | a | g | 5.74  | 9.45E-09 | 1 | 0.001 | 0.243 | rs62062288   | 9 | KANSL1 | 0 | intronic | 2.22 | 4  | 4 |
| rs17577094  | 17 | 44187492 | a | g | 5.74  | 9.47E-09 | 1 | 0.001 | 0.244 | rs62062288   | 9 | KANSL1 | 0 | intronic | 2.58 | 1f | 4 |
| rs56406462  | 17 | 44119474 | t | c | 5.74  | 9.48E-09 | 1 | 0.001 | 0.246 | rs62062288   | 9 | KANSL1 | 0 | intronic |      |    |   |
| rs111676341 | 17 | 44183403 | a | g | 5.74  | 9.49E-09 | 1 | 0.001 | 0.247 | rs62062288   | 9 | KANSL1 | 0 | intronic | 4.40 | 5  | 4 |
| rs17564948  | 17 | 44011749 | a | g | 5.74  | 9.49E-09 | 1 | 0.001 | 0.248 | rs62062288   | 9 | MAPT   | 0 | intronic | 0.90 | 1f | 1 |
| rs62063799  | 17 | 44205425 | a | g | -5.74 | 9.50E-09 | 1 | 0.001 | 0.249 | rs62062288   | 9 | KANSL1 | 0 | intronic | 2.07 | 6  | 3 |
| rs4548919   | 17 | 44192395 | t | g | -5.74 | 9.51E-09 | 1 | 0.001 | 0.250 | rs62062288   | 9 | KANSL1 | 0 | intronic | 0.80 | 6  | 5 |
| rs62061813  | 17 | 44181118 | a | g | -5.74 | 9.52E-09 | 1 | 0.001 | 0.251 | rs62062288   | 9 | KANSL1 | 0 | intronic | 1.68 | 5  | 5 |
| rs17577954  | 17 | 44209628 | t | c | 5.74  | 9.53E-09 | 1 | 0.001 | 0.252 | rs62062288   | 9 | KANSL1 | 0 | intronic | 1.07 | 6  | 4 |
| rs62063300  | 17 | 44048350 | t | c | 5.74  | 9.54E-09 | 1 | 0.001 | 0.254 | rs62062288   | 9 | MAPT   | 0 | intronic | 3.43 | 4  | 4 |
| rs17660926  | 17 | 44181159 | t | c | -5.74 | 9.54E-09 | 1 | 0.001 | 0.253 | rs62062288   | 9 | KANSL1 | 0 | intronic | 3.31 | 1f | 5 |
| rs111372048 | 17 | 44138577 | a | c | 5.74  | 9.54E-09 | 1 | 0.001 | 0.255 | rs62062288   | 9 | KANSL1 | 0 | intronic | 0.83 | 4  | 4 |
| rs75975083  | 17 | 44146357 | t | c | 5.74  | 9.55E-09 | 1 | 0.001 | 0.256 | rs62062288   | 9 | KANSL1 | 0 | intronic | 0.08 | 7  | 4 |
| rs62063789  | 17 | 44061898 | t | c | 5.74  | 9.56E-09 | 1 | 0.001 | 0.258 | rs62062288   | 9 | MAPT   | 0 | intronic | 1.24 | 4  | 4 |
| rs62063203  | 17 | 44209313 | t | c | 5.74  | 9.57E-09 | 1 | 0.001 | 0.259 | rs62062288   | 9 | KANSL1 | 0 | intronic | 2.48 | 5  | 5 |
| rs70717444  | 17 | 44028796 | t | c | 5.74  | 9.57E-09 | 1 | 0.001 | 0.260 | rs62062288   | 9 | MAPT   | 0 | intronic | 2.08 | 2b | 5 |
| rs112401617 | 17 | 44209471 | a | t | -5.74 | 9.57E-09 | 1 | 0.001 | 0.261 | rs62062288   | 9 | KANSL1 | 0 | intronic | 1.63 | 7  | 4 |
| rs17564871  | 17 | 44011018 | a | g | 5.74  | 9.57E-09 | 1 | 0.001 | 0.262 | rs62062288   | 9 | MAPT   | 0 | intronic | 5.63 | 6  | 1 |
| rs62062323  | 17 | 44113224 | a | c | -5.74 | 9.58E-09 | 1 | 0.001 | 0.263 | rs62062288   | 9 | KANSL1 | 0 | intronic |      |    |   |
| rs17659731  | 17 | 44144634 | a | g | -5.74 | 9.59E-09 | 1 | 0.001 | 0.264 | rs62062288   | 9 | KANSL1 | 0 | intronic | 4.15 | 1f | 4 |
| rs111724389 | 17 | 44209364 | a | g | -5.74 | 9.59E-09 | 1 | 0.001 | 0.265 | rs62062288   | 9 | KANSL1 | 0 | intronic | 0.29 | 5  | 4 |
| rs62061814  | 17 | 44181508 | t | g | 5.74  | 9.59E-09 | 1 | 0.001 | 0.266 | rs62062288   | 9 | KANSL1 | 0 | intronic | 1.68 | 7  | 5 |
| rs17649704  | 17 | 44017901 | c | g | -5.74 | 9.61E-09 | 1 | 0.001 | 0.267 | rs62062288   | 9 | MAPT   | 0 | intronic | 1.18 | 1f | 2 |
| rs62062806  | 17 | 44031420 | a | g | -5.74 | 9.62E-09 | 1 | 0.001 | 0.268 | rs62062288   | 9 | MAPT   | 0 | intronic | 1.07 | 5  | 5 |
| rs12150570  | 17 | 44126218 | a | g | -5.74 | 9.62E-09 | 1 | 0.001 | 0.269 | rs62062288   | 9 | KANSL1 | 0 | intronic | 3.87 | 6  | 4 |
| rs79301522  | 17 | 44207932 | a | g | 5.74  | 9.62E-09 | 1 | 0.001 | 0.270 | rs62062288   | 9 | KANSL1 | 0 | intronic | 0.45 | 5  | 2 |
| rs12150230  | 17 | 44015464 | a | g | 5.74  | 9.63E-09 | 1 | 0.001 | 0.272 | rs62062288   | 9 | MAPT   | 0 | intronic | 3.35 | 6  | 5 |
| rs55903947  | 17 | 44209957 | a | g | 5.74  | 9.63E-09 | 1 | 0.001 | 0.273 | rs62062288   | 9 | KANSL1 | 0 | intronic | 3.61 | 6  | 4 |
| rs17575827  | 17 | 44144345 | a | g | 5.74  | 9.63E-09 | 1 | 0.001 | 0.274 | rs62062288   | 9 | KANSL1 | 0 | intronic | 7.91 | 6  | 3 |
| rs17575850  | 17 | 44144387 | a | c | -5.74 | 9.63E-09 | 1 | 0.001 | 0.275 | rs62062288   | 9 | KANSL1 | 0 | intronic | 5.59 | 6  | 3 |
| rs55978005  | 17 | 44031540 | t | g | -5.74 | 9.64E-09 | 1 | 0.001 | 0.276 | rs62062288</ |   |        |   |          |      |    |   |

|             |    |          |   |   |       |          |   |       |       |            |   |        |   |            |       |    |   |
|-------------|----|----------|---|---|-------|----------|---|-------|-------|------------|---|--------|---|------------|-------|----|---|
| rs1468240   | 17 | 44196447 | a | t | -5.73 | 9.81E-09 | 1 | 0.001 | 0.333 | rs62062288 | 9 | KANSL1 | 0 | intronic   | 4.93  | 5  | 2 |
| rs62063669  | 17 | 44122626 | a | c | -5.73 | 9.81E-09 | 1 | 0.001 | 0.334 | rs62062288 | 9 | KANSL1 | 0 | intronic   |       |    |   |
| rs62062771  | 17 | 44020282 | a | g | -5.73 | 9.81E-09 | 1 | 0.001 | 0.336 | rs62062288 | 9 | MAPT   | 0 | intronic   | 14.13 | 5  | 2 |
| rs62062770  | 17 | 44019680 | t | c | 5.73  | 9.82E-09 | 1 | 0.001 | 0.338 | rs62062288 | 9 | MAPT   | 0 | intronic   | 2.38  | 2b |   |
| rs75229280  | 17 | 44196653 | a | g | -5.73 | 9.82E-09 | 1 | 0.001 | 0.337 | rs62062288 | 9 | KANSL1 | 0 | intronic   | 1.74  | 2  | 5 |
| rs12150460  | 17 | 44014137 | t | g | -5.73 | 9.82E-09 | 1 | 0.001 | 0.340 | rs62062288 | 9 | MAPT   | 0 | intronic   | 1.31  | 1d | 2 |
| rs113909426 | 17 | 44196822 | a | g | -5.73 | 9.82E-09 | 1 | 0.001 | 0.339 | rs62062288 | 9 | KANSL1 | 0 | intronic   | 0.99  | 6  | 5 |
| rs113537106 | 17 | 44019462 | a | g | 5.73  | 9.83E-09 | 1 | 0.001 | 0.341 | rs62062288 | 9 | MAPT   | 0 | intronic   | 1.41  | 6  | 5 |
| rs62062777  | 17 | 44027366 | t | g | 5.73  | 9.83E-09 | 1 | 0.001 | 0.342 | rs62062288 | 9 | MAPT   | 0 | intronic   | 2.19  | 5  | 5 |
| rs8070942   | 17 | 44208674 | t | g | -5.73 | 9.84E-09 | 1 | 0.001 | 0.343 | rs62062288 | 9 | KANSL1 | 0 | intronic   | 0.17  | 6  | 2 |
| rs767057    | 17 | 43998822 | a | g | 5.73  | 9.84E-09 | 1 | 0.001 | 0.344 | rs62062288 | 9 | MAPT   | 0 | intronic   | 5.45  | 5  | 4 |
| rs62061725  | 17 | 44016157 | c | g | -5.73 | 9.85E-09 | 1 | 0.001 | 0.345 | rs62062288 | 9 | MAPT   | 0 | intronic   | 0.34  | 7  | 5 |
| rs62063670  | 17 | 44123248 | t | c | 5.73  | 9.85E-09 | 1 | 0.001 | 0.346 | rs62062288 | 9 | KANSL1 | 0 | intronic   | 1.57  | 3a | 4 |
| rs2062066   | 17 | 43979971 | a | g | -5.73 | 9.85E-09 | 1 | 0.001 | 0.348 | rs62062288 | 9 | MAPT   | 0 | intronic   | 3.04  | 6  | 5 |
| rs62062768  | 17 | 44019643 | a | g | -5.73 | 9.85E-09 | 1 | 0.001 | 0.347 | rs62062288 | 9 | MAPT   | 0 | intronic   | 1.05  | 7  | 2 |
| rs62062798  | 17 | 44027383 | a | g | 5.73  | 9.85E-09 | 1 | 0.001 | 0.349 | rs62062288 | 9 | MAPT   | 0 | intronic   | 2.13  | 4  | 5 |
| rs62056840  | 17 | 43989689 | t | c | 5.73  | 9.86E-09 | 1 | 0.001 | 0.350 | rs62062288 | 9 | MAPT   | 0 | intronic   | 2.89  | 7  | 4 |
| rs79860128  | 17 | 43990072 | a | g | 5.73  | 9.86E-09 | 1 | 0.001 | 0.351 | rs62062288 | 9 | MAPT   | 0 | intronic   | 1.00  | 6  | 4 |
| rs112748008 | 17 | 44126950 | t | c | -5.73 | 9.87E-09 | 1 | 0.001 | 0.353 | rs62062288 | 9 | KANSL1 | 0 | intronic   | 3.97  | 6  | 4 |
| rs60120913  | 17 | 44117755 | c | g | 5.73  | 9.87E-09 | 1 | 0.001 | 0.352 | rs62062288 | 9 | KANSL1 | 0 | intronic   | 0.03  | 4  | 5 |
| rs62061727  | 17 | 44017124 | t | g | -5.73 | 9.87E-09 | 1 | 0.001 | 0.355 | rs62062288 | 9 | MAPT   | 0 | intronic   | 6.75  | 5  | 5 |
| rs62063298  | 17 | 44048323 | t | g | -5.73 | 9.87E-09 | 1 | 0.001 | 0.356 | rs62062288 | 9 | MAPT   | 0 | intronic   | 5.21  | 5  | 4 |
| rs55780786  | 17 | 44209875 | t | c | 5.73  | 9.87E-09 | 1 | 0.001 | 0.357 | rs62062288 | 9 | KANSL1 | 0 | intronic   | 1.44  | 7  | 4 |
| rs113982577 | 17 | 44010681 | a | g | 5.73  | 9.88E-09 | 1 | 0.001 | 0.358 | rs62062288 | 9 | MAPT   | 0 | intronic   | 1.74  | 7  | 1 |
| rs111447859 | 17 | 43987184 | t | c | 5.73  | 9.88E-09 | 1 | 0.001 | 0.359 | rs62062288 | 9 | MAPT   | 0 | RNA_intron | 1.04  | 7  | 5 |
| rs62064688  | 17 | 44020281 | a | g | -5.73 | 9.89E-09 | 1 | 0.001 | 0.360 | rs62062288 | 9 | MAPT   | 0 | intronic   | 1.24  | 6  | 4 |
| rs62063271  | 17 | 44036047 | a | g | -5.73 | 9.90E-09 | 1 | 0.001 | 0.361 | rs62062288 | 9 | MAPT   | 0 | intronic   | 1.28  | 5  | 5 |
| rs7350980   | 17 | 44110271 | a | g | -5.73 | 9.91E-09 | 1 | 0.001 | 0.362 | rs62062288 | 9 | KANSL1 | 0 | intronic   | 0.12  | 6  | 3 |
| rs28418608  | 17 | 44021218 | t | c | -5.73 | 9.93E-09 | 1 | 0.001 | 0.363 | rs62062288 | 9 | MAPT   | 0 | intronic   | 4.10  | 5  | 4 |
| rs62061730  | 17 | 44017342 | a | g | 5.73  | 9.93E-09 | 1 | 0.001 | 0.364 | rs62062288 | 9 | MAPT   | 0 | intronic   | 7.59  | 5  | 5 |
| rs12150104  | 17 | 44015929 | a | g | -5.73 | 9.93E-09 | 1 | 0.001 | 0.365 | rs62062288 | 9 | MAPT   | 0 | intronic   | 2.75  | 1f | 5 |
| rs62061847  | 17 | 44191682 | a | g | -5.73 | 9.94E-09 | 1 | 0.001 | 0.366 | rs62062288 | 9 | KANSL1 | 0 | intronic   | 0.29  | 5  | 5 |
| rs4597358   | 17 | 44110670 | c | g | 5.73  | 9.95E-09 | 1 | 0.001 | 0.367 | rs62062288 | 9 | KANSL1 | 0 | intronic   | 5.10  | 1f | 3 |
| rs62061853  | 17 | 44196125 | t | c | 5.73  | 9.95E-09 | 1 | 0.001 | 0.368 | rs62062288 | 9 | KANSL1 | 0 | intronic   | 6.20  | 5  | 2 |
| rs17660132  | 17 | 44165803 | t | c | 5.73  | 9.95E-09 | 1 | 0.001 | 0.369 | rs62062288 | 9 | KANSL1 | 0 | intronic   | 2.50  | 1f | 5 |
| rs15777313  | 17 | 44014384 | a | g | 5.73  | 9.96E-09 | 1 | 0.001 | 0.370 | rs62062288 | 9 | KANSL1 | 0 | intronic   | 3.22  | 1f | 4 |
| rs12150576  | 17 | 44015624 | a | g | -5.73 | 9.97E-09 | 1 | 0.001 | 0.372 | rs62062288 | 9 | MAPT   | 0 | intronic   | 3.64  | 6  | 5 |
| rs727425    | 17 | 44195495 | a | g | -5.73 | 9.97E-09 | 1 | 0.001 | 0.371 | rs62062288 | 9 | KANSL1 | 0 | intronic   | 5.35  | 2  | 2 |
| rs3087534   | 17 | 44198806 | t | c | 5.73  | 9.99E-09 | 1 | 0.001 | 0.373 | rs62062288 | 9 | KANSL1 | 0 | intronic   | 2.90  | 2a | 2 |
| rs10514901  | 17 | 44194375 | t | g | -5.73 | 9.99E-09 | 1 | 0.001 | 0.374 | rs62062288 | 9 | KANSL1 | 0 | intronic   | 1.11  | 1f | 5 |
| rs17564020  | 17 | 43991781 | t | g | -5.73 | 9.99E-09 | 1 | 0.001 | 0.375 | rs62062288 | 9 | MAPT   | 0 | intronic   | 3.04  | 1b | 2 |
| rs4383188   | 17 | 44017603 | a | g | -5.73 | 9.99E-09 | 1 | 0.001 | 0.376 | rs62062288 | 9 | KANSL1 | 0 | intronic   | 1.73  | 1f | 2 |
| rs7924424   | 17 | 44012915 | t | c | 5.73  | 1.00E-08 | 1 | 0.001 | 0.377 | rs62062288 | 9 | MAPT   | 0 | intronic   | 0.76  | 4  | 4 |
| rs79923708  | 17 | 44183790 | a | g | -5.73 | 1.00E-08 | 1 | 0.001 | 0.379 | rs62062288 | 9 | KANSL1 | 0 | intronic   | 0.32  | 7  | 4 |
| rs62063668  | 17 | 44122484 | t | c | -5.73 | 1.00E-08 | 1 | 0.001 | 0.380 | rs62062288 | 9 | KANSL1 | 0 | intronic   | 4.11  | 4  | 4 |
| rs17564223  | 17 | 43997250 | t | c | -5.73 | 1.00E-08 | 1 | 0.001 | 0.382 | rs62062288 | 9 | MAPT   | 0 | intronic   | 3.90  | 1f | 2 |
| rs62061726  | 17 | 44024341 | a | g | -5.73 | 1.00E-08 | 1 | 0.001 | 0.381 | rs62062288 | 9 | MAPT   | 0 | intronic   | 0.84  | 7  | 5 |
| rs74348226  | 17 | 44165855 | a | g | 5.73  | 1.00E-08 | 1 | 0.001 | 0.383 | rs62062288 | 9 | KANSL1 | 0 | intronic   | 2.81  | 7  | 5 |
| rs10514888  | 17 | 44119636 | a | g | 5.73  | 1.00E-08 | 1 | 0.001 | 0.384 | rs62062288 | 9 | KANSL1 | 0 | intronic   | 1.72  | 6  | 4 |
| rs62056848  | 17 | 43992456 | a | g | -5.73 | 1.01E-08 | 1 | 0.001 | 0.387 | rs62062288 | 9 | MAPT   | 0 | intronic   | 10.15 | 5  | 4 |
| rs62056849  | 17 | 43992463 | c | g | -5.73 | 1.01E-08 | 1 | 0.001 | 0.386 | rs62062288 | 9 | MAPT   | 0 | intronic   | 9.55  | 2b | 4 |
| rs62062781  | 17 | 44022632 | a | g | -5.73 | 1.01E-08 | 1 | 0.001 | 0.388 | rs62062288 | 9 | MAPT   | 0 | intronic   | 2.41  | 5  | 5 |
| rs62063262  | 17 | 44030243 | a | g | -5.73 | 1.01E-08 | 1 | 0.001 | 0.385 | rs62062288 | 9 | MAPT   | 0 | intronic   | 1.05  | 7  | 5 |
| rs41390444  | 17 | 44121469 | t | c | -5.73 | 1.01E-08 | 1 | 0.001 | 0.389 | rs62062288 | 9 | KANSL1 | 0 | intronic   | 0.69  | 2  | 2 |
| rs79252344  | 17 | 44120608 | a | g | 5.73  | 1.01E-08 | 1 | 0.001 | 0.391 | rs62062288 | 9 | KANSL1 | 0 | intronic   | 2.22  | 6  | 4 |
| rs17575423  | 17 | 44129253 | t | c | 5.73  | 1.01E-08 | 1 | 0.001 | 0.390 | rs62062288 | 9 | KANSL1 | 0 | intronic   | 0.95  | 1f | 4 |
| rs62063680  | 17 | 44131559 | a | c | -5.73 | 1.01E-08 | 1 | 0.001 | 0.392 | rs62062288 | 9 | KANSL1 | 0 | intronic   | 3.29  | 5  | 4 |
| rs55874169  | 17 | 44014384 | a | g | -5.73 | 1.01E-08 | 1 | 0.001 | 0.393 | rs62062288 | 9 | MAPT   | 0 | intronic   | 0.29  | 4  | 4 |
| rs12150242  | 17 | 44015819 | a | g | 5.73  | 1.01E-08 | 1 | 0.001 | 0.394 | rs62062288 | 9 | MAPT   | 0 | intronic   | 6.59  | 5  | 4 |
| rs62063854  | 17 | 44074619 | a | g | -5.73 | 1.01E-08 | 1 | 0.001 | 0.395 | rs62062288 | 9 | MAPT   | 0 | intronic   | 6.31  | 5  | 4 |
| rs17650771  | 17 | 44035367 | a | g | 5.73  | 1.01E-08 | 1 | 0.001 | 0.396 | rs62062288 | 9 | MAPT   | 0 | intronic   | 2.62  | 1f | 5 |
| rs17573907  | 17 | 44009802 | t | c | -5.73 | 1.01E-08 | 1 | 0.001 | 0.397 | rs62062288 | 9 | MAPT   | 0 | intronic   | 1.04  | 7  | 4 |
| rs17564619  | 17 | 44002138 | a | g | 5.73  | 1.01E-08 | 1 | 0.001 | 0.400 | rs62062288 | 9 | MAPT   | 0 | intronic   | 3.19  | 1f | 2 |
| rs62063275  | 17 | 44035289 | t | g | -5.73 | 1.02E-08 | 1 | 0.001 | 0.398 | rs62062288 | 9 | MAPT   | 0 | intronic   | 1.98  | 7  | 5 |
| rs55893711  | 17 | 44119320 | t | c | -5.73 | 1.01E-08 | 1 | 0.001 | 0.399 | rs62062288 | 9 | KANSL1 | 0 | intronic   | 0.82  | 7  | 5 |
| rs17571857  | 17 | 44035706 | a | g | 5.73  | 1.01E-08 | 1 | 0.001 | 0.402 | rs62062288 | 9 | MAPT   | 0 | intronic   | 10.21 | 1f | 5 |
| rs41374248  | 17 | 44120442 | a | g | 5.73  | 1.01E-08 | 1 | 0.001 | 0.401 | rs62062288 | 9 | KANSL1 | 0 | intronic   | 2.80  | 5  | 4 |
| rs112916880 | 17 | 44039129 | t | c | -5.73 | 1.01E-08 | 1 | 0.001 | 0.403 | rs62062288 | 9 | MAPT   | 0 | intronic   | 0.49  | 5  | 4 |
| rs17652066  | 17 | 44024145 | c | g | -5.73 | 1.02E-08 | 1 | 0.001 | 0.404 | rs62062288 | 9 | MAPT   | 0 | intronic   | 1.22  | 5  | 4 |
| rs17650417  | 17 | 44013103 | a | g | -5.73 | 1.02E-08 | 1 | 0.001 | 0.405 | rs62062288 | 9 | MAPT   | 0 | intronic   | 3.68  | 1f | 1 |
| rs62064684  | 17 | 44081462 | t | c | 5.73  | 1.02E-08 | 1 | 0.001 | 0.406 | rs62062288 | 9 | MAPT   | 0 | intronic   | 1.12  | 4  | 2 |
| rs12150447  | 17 | 44128125 | a | c | 5.73  | 1.02E-08 | 1 | 0.001 | 0.407 | rs62062288 | 9 | KANSL1 | 0 | intronic   | 3.23  | 1f | 4 |
| rs62056859  | 17 | 43994435 | a | g | 5.73  | 1.02E-08 | 1 | 0.001 | 0.408 | rs62062288 | 9 | MAPT   | 0 | intronic   | 4.50  | 5  | 4 |
| rs2316952   | 17 | 4399190  | c | g | -5.73 | 1.02E-08 | 1 | 0.001 | 0.409 | rs62062288 | 9 | KANSL1 | 0 | intronic   | 6.07  | 4  | 4 |
| rs733966    | 17 | 44039663 | t | c | -5.73 | 1.02E-08 | 1 | 0.001 | 0.410 | rs62062288 | 9 | MAPT   | 0 | intronic   | 7.56  | 2  | 2 |
| rs62056851  | 17 | 43992806 | a | g | -5.73 | 1.02E-08 | 1 | 0.001 | 0.411 | rs62062288 | 9 | MAPT   | 0 | intronic   | 4.03  | 4  | 4 |
| rs79346219  | 17 | 44184375 | a | g | 5.73  | 1.02E-08 | 1 | 0.001 | 0.412 | rs62062288 | 9 | KANSL1 | 0 | intronic   | 0.81  | 5  | 2 |
| rs55788678  | 17 | 43992233 | t | c | -5.73 | 1.02E-08 | 1 | 0.001 | 0.418 |            |   |        |   |            |       |    |   |

|             |    |          |   |   |       |          |   |       |       |            |   |                   |   |            |       |    |   |
|-------------|----|----------|---|---|-------|----------|---|-------|-------|------------|---|-------------------|---|------------|-------|----|---|
| rs62061729  | 17 | 44017283 | a | g | 5.73  | 1.03E-08 | 1 | 0.001 | 0.471 | rs62062288 | 9 | MAPT              | 0 | intronic   | 0.46  | 5  | 5 |
| rs111853996 | 17 | 44130878 | a | g | 5.73  | 1.03E-08 | 1 | 0.001 | 0.468 | rs62062288 | 9 | KANSL1            | 0 | intronic   | 1.44  | 6  | 4 |
| rs112674766 | 17 | 44130924 | a | t | 5.73  | 1.03E-08 | 1 | 0.001 | 0.472 | rs62062288 | 9 | KANSL1            | 0 | intronic   | 2.33  | 6  | 4 |
| rs62063863  | 17 | 44131717 | a | g | -5.73 | 1.03E-08 | 1 | 0.001 | 0.469 | rs62062288 | 9 | KANSL1            | 0 | intronic   | 1.87  | 7  | 4 |
| rs62060794  | 17 | 44142566 | t | c | -5.73 | 1.03E-08 | 1 | 0.001 | 0.473 | rs62062288 | 9 | KANSL1            | 0 | intronic   | 2.54  | 5  | 4 |
| rs2316955   | 17 | 44161985 | t | g | 5.73  | 1.03E-08 | 1 | 0.001 | 0.470 | rs62062288 | 9 | KANSL1            | 0 | intronic   | 2.96  | 6  | 4 |
| rs55685451  | 17 | 44001957 | t | g | 5.73  | 1.03E-08 | 1 | 0.001 | 0.476 | rs62062288 | 9 | MAPT              | 0 | intronic   | 7.39  | 5  | 2 |
| rs11756481  | 17 | 44002062 | a | c | 5.73  | 1.03E-08 | 1 | 0.001 | 0.480 | rs62062288 | 9 | MAPT              | 0 | intronic   | 0.07  | 5  | 2 |
| rs76302353  | 17 | 44002969 | a | c | 5.73  | 1.03E-08 | 1 | 0.001 | 0.479 | rs62062288 | 9 | MAPT              | 0 | intronic   | 0.11  | 4  | 5 |
| rs55788597  | 17 | 44003397 | a | t | -5.73 | 1.03E-08 | 1 | 0.001 | 0.475 | rs62062288 | 9 | MAPT              | 0 | intronic   | 7.38  | 7  | 5 |
| rs56197117  | 17 | 44003446 | a | g | 5.73  | 1.03E-08 | 1 | 0.001 | 0.477 | rs62062288 | 9 | MAPT              | 0 | intronic   | 0.12  | 6  | 5 |
| rs56249311  | 17 | 44003599 | t | c | -5.73 | 1.03E-08 | 1 | 0.001 | 0.478 | rs62062288 | 9 | MAPT              | 0 | intronic   | 1.30  | 6  | 5 |
| rs62059004  | 17 | 44003893 | a | g | 5.73  | 1.03E-08 | 1 | 0.001 | 0.474 | rs62062288 | 9 | MAPT              | 0 | intronic   | 6.22  | 7  | 5 |
| rs62059003  | 17 | 44002451 | t | c | -5.73 | 1.04E-08 | 1 | 0.001 | 0.468 | rs62062288 | 9 | MAPT              | 0 | intronic   | 9.85  | 7  | 5 |
| rs17564703  | 17 | 44002452 | a | c | -5.73 | 1.04E-08 | 1 | 0.001 | 0.491 | rs62062288 | 9 | MAPT              | 0 | intronic   | 0.37  | 5  | 5 |
| rs77875796  | 17 | 44051612 | a | g | 5.73  | 1.04E-08 | 1 | 0.001 | 0.482 | rs62062288 | 9 | MAPT              | 0 | UTR5       | 8.58  | 4  | 2 |
| rs79649865  | 17 | 44130587 | t | g | 5.73  | 1.04E-08 | 1 | 0.001 | 0.489 | rs62062288 | 9 | KANSL1            | 0 | intronic   | 3.94  | 7  | 4 |
| rs62060764  | 17 | 44133633 | a | g | 5.73  | 1.04E-08 | 1 | 0.001 | 0.483 | rs62062288 | 9 | KANSL1            | 0 | intronic   | 2.37  | 7  | 4 |
| rs62060765  | 17 | 44133648 | a | c | 5.73  | 1.04E-08 | 1 | 0.001 | 0.487 | rs62062288 | 9 | KANSL1            | 0 | intronic   | 1.23  | 7  | 4 |
| rs17575507  | 17 | 44134095 | a | g | 5.73  | 1.04E-08 | 1 | 0.001 | 0.481 | rs62062288 | 9 | KANSL1            | 0 | intronic   | 0.67  | 11 | 2 |
| rs876944    | 17 | 44134391 | t | g | -5.73 | 1.04E-08 | 1 | 0.001 | 0.485 | rs62062288 | 9 | KANSL1            | 0 | intronic   | 1.84  | 1f | 2 |
| rs62060767  | 17 | 44134910 | a | g | -5.73 | 1.04E-08 | 1 | 0.001 | 0.492 | rs62062288 | 9 | KANSL1            | 0 | intronic   | 2.69  | 4  | 2 |
| rs62060769  | 17 | 44135026 | c | g | -5.73 | 1.04E-08 | 1 | 0.001 | 0.484 | rs62062288 | 9 | KANSL1            | 0 | intronic   | 0.77  | 5  | 2 |
| rs1107820   | 17 | 44135359 | t | c | 5.73  | 1.04E-08 | 1 | 0.001 | 0.490 | rs62062288 | 9 | KANSL1            | 0 | intronic   | 1.31  | 7  | 2 |
| rs62060795  | 17 | 44142063 | t | c | -5.73 | 1.04E-08 | 1 | 0.001 | 0.486 | rs62062288 | 9 | KANSL1            | 0 | intronic   | 3.44  | 5  | 4 |
| rs75046472  | 17 | 43987499 | a | t | 5.73  | 1.04E-08 | 1 | 0.001 | 0.493 | rs62062288 | 9 | MAPT              | 0 | intronic   | 0.98  | 5  | 2 |
| rs62059964  | 17 | 43999406 | a | g | 5.73  | 1.04E-08 | 1 | 0.001 | 0.495 | rs62062288 | 9 | MAPT              | 0 | intronic   | 2.31  | 5  | 4 |
| rs17650063  | 17 | 44002555 | a | g | 5.73  | 1.04E-08 | 1 | 0.001 | 0.497 | rs62062288 | 9 | MAPT              | 0 | intronic   | 1.71  | 1f | 5 |
| rs79115768  | 17 | 44021061 | t | c | -5.73 | 1.04E-08 | 1 | 0.001 | 0.493 | rs62062288 | 9 | MAPT              | 0 | intronic   | 4.67  | 7  | 2 |
| rs17575773  | 17 | 44142879 | t | c | -5.73 | 1.04E-08 | 1 | 0.001 | 0.494 | rs62062288 | 9 | KANSL1            | 0 | intronic   | 2.12  | 6  | 4 |
| rs62061852  | 17 | 44195424 | a | c | 5.73  | 1.04E-08 | 1 | 0.001 | 0.496 | rs62062288 | 9 | KANSL1            | 0 | intronic   | 1.20  | 2b | 2 |
| rs62056812  | 17 | 43987154 | a | g | -5.73 | 1.04E-08 | 1 | 0.001 | 0.504 | rs62062288 | 9 | MAPTRP11-69E1.4.4 | 0 | RNA_intron | 0.71  | 7  | 5 |
| rs767059    | 17 | 43999100 | c | g | -5.73 | 1.04E-08 | 1 | 0.001 | 0.499 | rs62062288 | 9 | MAPT              | 0 | intronic   | 0.10  | 1f | 4 |
| rs56002706  | 17 | 44000505 | t | c | -5.73 | 1.04E-08 | 1 | 0.001 | 0.502 | rs62062288 | 9 | MAPT              | 0 | intronic   | 0.69  | 5  | 2 |
| rs17649866  | 17 | 44000914 | t | c | -5.73 | 1.04E-08 | 1 | 0.001 | 0.508 | rs62062288 | 9 | MAPT              | 0 | intronic   | 0.51  | 1f | 2 |
| rs17564463  | 17 | 44001379 | t | c | -5.73 | 1.04E-08 | 1 | 0.001 | 0.501 | rs62062288 | 9 | MAPT              | 0 | intronic   | 10.48 | 1f | 2 |
| rs17649918  | 17 | 44001821 | a | g | 5.73  | 1.04E-08 | 1 | 0.001 | 0.506 | rs62062288 | 9 | MAPT              | 0 | intronic   | 4.39  | 1f | 2 |
| rs17649954  | 17 | 44001661 | a | g | 5.73  | 1.04E-08 | 1 | 0.001 | 0.507 | rs62062288 | 9 | MAPT              | 0 | intronic   | 0.81  | 1f | 2 |
| rs2316782   | 17 | 44010040 | a | g | 5.73  | 1.04E-08 | 1 | 0.001 | 0.505 | rs62062288 | 9 | MAPT              | 0 | intronic   | 11.62 | 6  | 5 |
| rs62063851  | 17 | 44074435 | c | g | 5.73  | 1.04E-08 | 1 | 0.001 | 0.503 | rs62062288 | 9 | MAPT              | 0 | intronic   | 5.34  | 5  | 4 |
| rs113788190 | 17 | 44161302 | a | g | 5.73  | 1.04E-08 | 1 | 0.001 | 0.500 | rs62062288 | 9 | KANSL1            | 0 | intronic   | 1.41  | 6  | 4 |
| rs112349020 | 17 | 44161361 | a | t | 5.73  | 1.04E-08 | 1 | 0.001 | 0.507 | rs62062288 | 9 | KANSL1            | 0 | intronic   | 0.31  | 6  | 4 |
| rs8078495   | 17 | 44000610 | t | c | -5.72 | 1.04E-08 | 1 | 0.001 | 0.512 | rs62062288 | 9 | MAPT              | 0 | intronic   | 0.03  | 1f | 5 |
| rs4255816   | 17 | 44010364 | c | g | 5.72  | 1.04E-08 | 1 | 0.001 | 0.514 | rs62062288 | 9 | MAPT              | 0 | intronic   | 1.05  | 6  | 5 |
| rs62062774  | 17 | 44021463 | t | c | 5.72  | 1.04E-08 | 1 | 0.001 | 0.515 | rs62062288 | 9 | MAPT              | 0 | intronic   | 2.93  | 4  | 4 |
| rs62060797  | 17 | 44143344 | a | g | -5.72 | 1.04E-08 | 1 | 0.001 | 0.511 | rs62062288 | 9 | KANSL1            | 0 | intronic   | 4.23  | 6  | 4 |
| rs12150344  | 17 | 44143484 | a | g | -5.72 | 1.04E-08 | 1 | 0.001 | 0.510 | rs62062288 | 9 | KANSL1            | 0 | intronic   | 1.76  | 7  | 4 |
| rs62060858  | 17 | 44164099 | a | g | -5.73 | 1.04E-08 | 1 | 0.001 | 0.513 | rs62062288 | 9 | KANSL1            | 0 | intronic   | 0.51  | 4  | 4 |
| rs62059965  | 17 | 43999529 | c | g | -5.72 | 1.04E-08 | 1 | 0.001 | 0.519 | rs62062288 | 9 | MAPT              | 0 | intronic   | 0.28  | 7  | 4 |
| rs1967981   | 17 | 43999785 | c | g | 5.72  | 1.04E-08 | 1 | 0.001 | 0.518 | rs62062288 | 9 | MAPT              | 0 | intronic   | 1.62  | 7  | 4 |
| rs1476127   | 17 | 43999793 | a | g | -5.72 | 1.04E-08 | 1 | 0.001 | 0.516 | rs62062288 | 9 | MAPT              | 0 | intronic   | 4.47  | 5  | 4 |
| rs8079501   | 17 | 44000234 | a | t | 5.72  | 1.04E-08 | 1 | 0.001 | 0.521 | rs62062288 | 9 | MAPT              | 0 | intronic   | 1.96  | 1f | 4 |
| rs62060798  | 17 | 44161451 | t | c | -5.72 | 1.04E-08 | 1 | 0.001 | 0.517 | rs62062288 | 9 | KANSL1            | 0 | intronic   | 6.05  | 6  | 3 |
| rs17660294  | 17 | 44167101 | t | c | -5.72 | 1.04E-08 | 1 | 0.001 | 0.520 | rs62062288 | 9 | KANSL1            | 0 | intronic   | 3.13  | 1f | 4 |
| rs62059968  | 17 | 44001228 | a | g | -5.72 | 1.04E-08 | 1 | 0.001 | 0.523 | rs62062288 | 9 | MAPT              | 0 | intronic   | 4.08  | 4  | 2 |
| rs62060793  | 17 | 44142427 | a | g | 5.72  | 1.04E-08 | 1 | 0.001 | 0.525 | rs62062288 | 9 | KANSL1            | 0 | intronic   | 0.17  | 7  | 4 |
| rs62061766  | 17 | 44167484 | a | g | -5.72 | 1.04E-08 | 1 | 0.001 | 0.522 | rs62062288 | 9 | KANSL1            | 0 | intronic   | 2.88  | 6  | 4 |
| rs62061768  | 17 | 44168759 | a | g | -5.72 | 1.04E-08 | 1 | 0.001 | 0.524 | rs62062288 | 9 | KANSL1            | 0 | intronic   | 0.81  | 7  | 4 |
| rs17502888  | 17 | 43986992 | c | g | 5.72  | 1.04E-08 | 1 | 0.001 | 0.528 | rs62062288 | 9 | MAPTRP11-69E1.4.4 | 0 | RNA_intron | 4.81  | 7  | 5 |
| rs62063276  | 17 | 44036408 | t | g | 5.72  | 1.04E-08 | 1 | 0.001 | 0.527 | rs62062288 | 9 | MAPT              | 0 | intronic   | 0.78  | 6  | 5 |
| rs77184207  | 17 | 44142332 | t | g | 5.72  | 1.04E-08 | 1 | 0.001 | 0.529 | rs62062288 | 9 | KANSL1            | 0 | intronic   | 0     |    |   |
| rs79923630  | 17 | 44167860 | t | g | -5.72 | 1.04E-08 | 1 | 0.001 | 0.526 | rs62062288 | 9 | KANSL1            | 0 | intronic   | 1.71  | 7  | 4 |
| rs62061767  | 17 | 44167729 | a | g | 5.72  | 1.04E-08 | 1 | 0.001 | 0.530 | rs62062288 | 9 | KANSL1            | 0 | intronic   | 5.42  | 7  | 4 |
| rs62059007  | 17 | 44050561 | a | g | 5.72  | 1.04E-08 | 1 | 0.001 | 0.536 | rs62062288 | 9 | MAPT              | 0 | intronic   | 3.80  | 5  | 5 |
| rs1078222   | 17 | 44100769 | c | g | 5.72  | 1.04E-08 | 1 | 0.001 | 0.535 | rs62062288 | 9 | KANSL1            | 0 | intronic   | 3.46  | 1f | 3 |
| rs62060850  | 17 | 44157982 | a | t | 5.72  | 1.04E-08 | 1 | 0.001 | 0.531 | rs62062288 | 9 | KANSL1            | 0 | intronic   | 5.54  | 7  | 4 |
| rs62060853  | 17 | 44160592 | a | g | -5.72 | 1.04E-08 | 1 | 0.001 | 0.533 | rs62062288 | 9 | KANSL1            | 0 | intronic   | 3.75  | 7  | 2 |
| rs17660071  | 17 | 44160674 | c | g | -5.72 | 1.04E-08 | 1 | 0.001 | 0.534 | rs62062288 | 9 | KANSL1            | 0 | intronic   | 0.19  | 6  | 4 |
| rs5582232   | 17 | 44164323 | a | g | -5.72 | 1.04E-08 | 1 | 0.001 | 0.532 | rs62062288 | 9 | KANSL1            | 0 | intronic   | 1.31  | 7  | 4 |
| rs17649641  | 17 | 44009372 | t | c | -5.72 | 1.04E-08 | 1 | 0.001 | 0.538 | rs62062288 | 9 | MAPT              | 0 | intronic   | 0.78  | 1f | 2 |
| rs62061709  | 17 | 44007493 | t | c | -5.72 | 1.04E-08 | 1 | 0.001 | 0.539 | rs62062288 | 9 | MAPT              | 0 | intronic   | 0.49  | 7  | 5 |
| rs3912060   | 17 | 44165435 | t | c | -5.72 | 1.04E-08 | 1 | 0.001 | 0.540 | rs62062288 | 9 | KANSL1            | 0 | intronic   | 0.56  | 4  | 4 |
| rs62063201  | 17 | 44207360 | t | c | -5.72 | 1.04E-08 | 1 | 0.001 | 0.537 | rs62062288 | 9 | KANSL1            | 0 | intronic   | 0     |    |   |
| rs17564780  | 17 | 44005413 | a | g | 5.72  | 1.05E-08 | 1 | 0.001 | 0.543 | rs62062288 | 9 | MAPT              | 0 | intronic   | 1.12  | 1f | 5 |
| rs62059008  | 17 | 44055008 | a | g | 5.72  | 1.05E-08 | 1 | 0.001 | 0.548 | rs62062288 | 9 | MAPT              | 0 | intronic   | 0.96  | 7  | 5 |
| rs62061705  | 17 | 44006252 | t | c | -5.72 | 1.05E-08 | 1 | 0.001 | 0.549 | rs62062288 | 9 | MAPT              | 0 | intronic   | 0.59  | 7  | 5 |
| rs17564829  | 17 | 44006601 | t | c | 5.72  | 1.05E-08 | 1 | 0.001 | 0.541 | rs62062288 | 9 | MAPT              | 0 | intronic   | 3.95  | 7  | 5 |
| rs17650258  | 17 | 44011073 | a | g | -5.72 | 1.05E-08 | 1 | 0.    |       |            |   |                   |   |            |       |    |   |

|             |    |          |   |   |       |          |   |       |       |            |   |                    |   |           |       |    |   |
|-------------|----|----------|---|---|-------|----------|---|-------|-------|------------|---|--------------------|---|-----------|-------|----|---|
| rs55780945  | 17 | 44040120 | t | c | -5.72 | 1.06E-08 | 1 | 0.001 | 0.598 | rs62062288 | 9 | MAPT               | 0 | intronic  | 1.59  | 7  | 4 |
| rs17650818  | 17 | 44036787 | t | c | 5.72  | 1.06E-08 | 1 | 0.001 | 0.599 | rs62062288 | 9 | MAPT               | 0 | intronic  | 1.26  | 1f | 5 |
| rs11259120  | 17 | 44133534 | t | c | -5.72 | 1.06E-08 | 1 | 0.001 | 0.600 | rs62062288 | 9 | KANSL1             | 0 | intronic  | 3.54  | 7  | 4 |
| rs17576200  | 17 | 44159988 | a | g | -5.72 | 1.06E-08 | 1 | 0.001 | 0.601 | rs62062288 | 9 | KANSL1             | 0 | intronic  | 6.02  | 5  | 3 |
| rs17563986  | 17 | 43991272 | a | g | 5.72  | 1.06E-08 | 1 | 0.001 | 0.602 | rs62062288 | 9 | MAPT               | 0 | intronic  | 2.36  | 1f | 4 |
| rs62060852  | 17 | 44160050 | a | g | -5.72 | 1.06E-08 | 1 | 0.001 | 0.603 | rs62062288 | 9 | KANSL1             | 0 | intronic  | 3.36  | 5  | 2 |
| rs75546272  | 17 | 44130668 | a | t | -5.72 | 1.06E-08 | 1 | 0.001 | 0.604 | rs62062288 | 9 | KANSL1             | 0 | intronic  |       |    |   |
| rs62062274  | 17 | 44093319 | a | g | -5.72 | 1.06E-08 | 1 | 0.001 | 0.605 | rs62062288 | 9 | MAPT               | 0 | intronic  | 4.29  | 5  | 1 |
| rs62062780  | 17 | 44022593 | t | c | -5.72 | 1.07E-08 | 1 | 0.001 | 0.606 | rs62062288 | 9 | MAPT               | 0 | intronic  | 2.23  | 6  | 4 |
| rs17661428  | 17 | 44208144 | c | g | 5.72  | 1.07E-08 | 1 | 0.001 | 0.607 | rs62062288 | 9 | KANSL1             | 0 | intronic  | 0.18  | 1f | 2 |
| rs62063777  | 17 | 44053171 | a | g | 5.72  | 1.07E-08 | 1 | 0.001 | 0.609 | rs62062288 | 9 | MAPT               | 0 | UTR5      | 1.62  | 5  | 4 |
| rs12185243  | 17 | 44115351 | t | c | 5.72  | 1.07E-08 | 1 | 0.001 | 0.608 | rs62062288 | 9 | KANSL1             | 0 | intronic  | 3.73  | 1f | 4 |
| rs112647192 | 17 | 43994623 | a | g | -5.72 | 1.07E-08 | 1 | 0.001 | 0.614 | rs62062288 | 9 | MAPT               | 0 | intronic  | 0.04  | 4  | 4 |
| rs17653193  | 17 | 44112441 | a | g | -5.72 | 1.07E-08 | 1 | 0.001 | 0.611 | rs62062288 | 9 | KANSL1             | 0 | intronic  | 2.55  | 1b | 4 |
| rs17653211  | 17 | 44072635 | t | c | 5.72  | 1.07E-08 | 1 | 0.001 | 0.612 | rs62062288 | 9 | KANSL1             | 0 | intronic  | 1.83  | 1b | 4 |
| rs4608377   | 17 | 44113359 | t | c | 5.72  | 1.07E-08 | 1 | 0.001 | 0.616 | rs62062288 | 9 | KANSL1             | 0 | intronic  | 2.83  | 6  | 4 |
| rs12185225  | 17 | 44113491 | t | c | 5.72  | 1.07E-08 | 1 | 0.001 | 0.610 | rs62062288 | 9 | KANSL1             | 0 | intronic  | 1.74  | 7  | 4 |
| rs12150438  | 17 | 44113963 | t | c | -5.72 | 1.07E-08 | 1 | 0.001 | 0.613 | rs62062288 | 9 | KANSL1             | 0 | intronic  | 3.99  | 5  | 4 |
| rs62062134  | 17 | 44114432 | a | c | 5.72  | 1.07E-08 | 1 | 0.001 | 0.615 | rs62062288 | 9 | KANSL1             | 0 | intronic  | 0.20  | 5  | 4 |
| rs112415880 | 17 | 44022868 | a | g | -5.72 | 1.07E-08 | 1 | 0.001 | 0.622 | rs62062288 | 9 | MAPT               | 0 | intronic  | 1.15  | 6  | 4 |
| rs62062289  | 17 | 44097235 | c | g | -5.72 | 1.07E-08 | 1 | 0.001 | 0.619 | rs62062288 | 9 | MAPT               | 0 | intronic  | 1.13  | 6  | 4 |
| rs36076725  | 17 | 44110532 | a | g | -5.72 | 1.07E-08 | 1 | 0.001 | 0.617 | rs62062288 | 9 | KANSL1             | 0 | exonic    | 10.81 | 3  | 3 |
| rs35833914  | 17 | 44110541 | a | g | -5.72 | 1.07E-08 | 1 | 0.001 | 0.620 | rs62062288 | 9 | KANSL1             | 0 | exonic    | 4.24  | 3  | 3 |
| rs62062321  | 17 | 44111109 | a | g | 5.72  | 1.07E-08 | 1 | 0.001 | 0.623 | rs62062288 | 9 | KANSL1             | 0 | intronic  | 10.35 | 3a | 4 |
| rs175749013 | 17 | 44074613 | a | g | 5.72  | 1.07E-08 | 1 | 0.001 | 0.618 | rs62062288 | 9 | KANSL1             | 0 | exonic    | 2.66  | 6  | 4 |
| rs17574824  | 17 | 44115107 | t | c | -5.72 | 1.07E-08 | 1 | 0.001 | 0.621 | rs62062288 | 9 | KANSL1             | 0 | intronic  | 0.04  | 1f | 4 |
| rs74829364  | 17 | 44084533 | t | c | 5.72  | 1.07E-08 | 1 | 0.001 | 0.624 | rs62062288 | 9 | MAPT               | 0 | intronic  | 5.73  | 5  | 5 |
| rs62064669  | 17 | 44084676 | t | c | -5.72 | 1.07E-08 | 1 | 0.001 | 0.625 | rs62062288 | 9 | MAPT               | 0 | intronic  | 0.94  | 7  | 5 |
| rs2158257   | 17 | 44104343 | a | c | 5.72  | 1.07E-08 | 1 | 0.001 | 0.627 | rs62062288 | 9 | MAPT               | 0 | UTR3      | 2.05  | 4  | 4 |
| rs17652961  | 17 | 44108355 | a | g | -5.72 | 1.07E-08 | 1 | 0.001 | 0.626 | rs62062288 | 9 | KANSL1             | 0 | UTR3      | 0.18  | 1f | 3 |
| rs73209880  | 17 | 43985662 | t | c | 5.72  | 1.07E-08 | 1 | 0.001 | 0.628 | rs62062288 | 9 | MAPT,RP11-669E14.4 | 0 | rRNA_exor | 1.31  | 5  | 2 |
| rs62061719  | 17 | 44012989 | t | c | -5.72 | 1.07E-08 | 1 | 0.001 | 0.630 | rs62062288 | 9 | MAPT               | 0 | intronic  | 3.22  | 5  | 1 |
| rs17650381  | 17 | 44013024 | t | c | 5.72  | 1.07E-08 | 1 | 0.001 | 0.631 | rs62062288 | 9 | MAPT               | 0 | intronic  | 2.64  | 6  | 1 |
| rs17573245  | 17 | 44072854 | t | c | 5.72  | 1.07E-08 | 1 | 0.001 | 0.629 | rs62062288 | 9 | MAPT               | 0 | intronic  | 2.72  | 5  | 4 |
| rs12150627  | 17 | 44149537 | c | g | 5.72  | 1.07E-08 | 1 | 0.001 | 0.630 | rs62062288 | 9 | KANSL1             | 0 | intronic  | 1.94  | 5  | 2 |
| rs17652961  | 17 | 43985697 | t | c | -5.72 | 1.07E-08 | 1 | 0.001 | 0.632 | rs62062288 | 9 | MAPT,RP11-669E14.4 | 0 | rRNA_exor | 1.85  | 5  | 2 |
| rs55913645  | 17 | 44070956 | t | c | -5.72 | 1.07E-08 | 1 | 0.001 | 0.633 | rs62062288 | 9 | MAPT               | 0 | intronic  | 11.15 | 6  | 4 |
| rs62063303  | 17 | 44049133 | t | c | 5.72  | 1.07E-08 | 1 | 0.001 | 0.639 | rs62062288 | 9 | MAPT               | 0 | intronic  | 1.34  | 4  | 4 |
| rs17573175  | 17 | 44071089 | c | g | 5.72  | 1.07E-08 | 1 | 0.001 | 0.637 | rs62062288 | 9 | MAPT               | 0 | intronic  | 4.76  | 1f | 4 |
| rs62063845  | 17 | 44071294 | t | c | 5.72  | 1.07E-08 | 1 | 0.001 | 0.634 | rs62062288 | 9 | MAPT               | 0 | exonic    | 0.03  | 5  | 4 |
| rs5589680   | 17 | 44072041 | a | t | -5.72 | 1.07E-08 | 1 | 0.001 | 0.636 | rs62062288 | 9 | MAPT               | 0 | intronic  | 5.43  | 6  | 4 |
| rs62062288  | 17 | 44099859 | a | g | -5.72 | 1.08E-08 | 1 | 0.001 | 0.640 | rs62062288 | 9 | MAPT               | 0 | intronic  | 9.25  | 5  | 1 |
| rs111976319 | 17 | 44095335 | a | c | -5.72 | 1.07E-08 | 1 | 0.001 | 0.638 | rs62062288 | 9 | MAPT               | 0 | intronic  | 4.38  | 7  | 5 |
| rs62063850  | 17 | 43985247 | t | c | -5.72 | 1.08E-08 | 1 | 0.001 | 0.641 | rs62062288 | 9 | MAPT,RP11-669E14.4 | 0 | rRNA_exor | 7.57  | 5  | 2 |
| rs17574040  | 17 | 44073739 | a | g | -5.72 | 1.08E-08 | 1 | 0.001 | 0.644 | rs62062288 | 9 | MAPT               | 0 | intronic  | 19.18 | 5  | 4 |
| rs62063851  | 17 | 44102865 | a | g | 5.72  | 1.08E-08 | 1 | 0.001 | 0.642 | rs62062288 | 9 | MAPT               | 0 | UTR3      | 4.75  | 1f | 4 |
| rs62063861  | 17 | 44113152 | a | g | 5.72  | 1.08E-08 | 1 | 0.001 | 0.640 | rs62062288 | 9 | KANSL1             | 0 | intronic  | 8.1   | 5  | 4 |
| rs62060810  | 17 | 44148671 | a | g | -5.72 | 1.08E-08 | 1 | 0.001 | 0.643 | rs62062288 | 9 | KANSL1             | 0 | intronic  | 1.04  | 4  | 4 |
| rs62061734  | 17 | 44018488 | t | c | 5.72  | 1.08E-08 | 1 | 0.001 | 0.646 | rs62062288 | 9 | MAPT               | 0 | intronic  | 2.39  | 4  | 2 |
| rs62062792  | 17 | 44025347 | t | c | 5.72  | 1.08E-08 | 1 | 0.001 | 0.654 | rs62062288 | 9 | MAPT               | 0 | intronic  | 6.38  | 6  | 5 |
| rs62062802  | 17 | 44028045 | t | g | -5.72 | 1.08E-08 | 1 | 0.001 | 0.649 | rs62062288 | 9 | MAPT               | 0 | intronic  | 0.28  | 6  | 5 |
| rs74373419  | 17 | 44047609 | t | c | -5.72 | 1.08E-08 | 1 | 0.001 | 0.650 | rs62062288 | 9 | MAPT               | 0 | intronic  | 0.51  | 6  | 4 |
| rs55623247  | 17 | 44025541 | a | g | -5.72 | 1.08E-08 | 1 | 0.001 | 0.648 | rs62062288 | 9 | MAPT               | 0 | intronic  | 1.60  | 2b | 4 |
| rs62064670  | 17 | 44065852 | a | t | -5.72 | 1.08E-08 | 1 | 0.001 | 0.653 | rs62062288 | 9 | MAPT               | 0 | intronic  | 6.09  | 5  | 5 |
| rs62062269  | 17 | 44091092 | c | g | -5.72 | 1.08E-08 | 1 | 0.001 | 0.645 | rs62062288 | 9 | MAPT               | 0 | intronic  | 1.45  | 3a | 2 |
| rs62062270  | 17 | 44091195 | t | c | 5.72  | 1.08E-08 | 1 | 0.001 | 0.651 | rs62062288 | 9 | MAPT               | 0 | intronic  | 0.79  | 2b | 2 |
| rs1052594   | 17 | 44102889 | t | c | -5.72 | 1.08E-08 | 1 | 0.001 | 0.652 | rs62062288 | 9 | MAPT               | 0 | UTR3      | 7.03  | 1f | 4 |
| rs62060760  | 17 | 44013287 | t | c | -5.72 | 1.08E-08 | 1 | 0.001 | 0.647 | rs62062288 | 9 | KANSL1             | 0 | intronic  | 11.04 | 6  | 4 |
| rs5631516   | 17 | 44148269 | t | c | -5.72 | 1.08E-08 | 1 | 0.001 | 0.655 | rs62062288 | 9 | KANSL1             | 0 | intronic  | 10.24 | 6  | 4 |
| rs79492906  | 17 | 43984864 | t | c | -5.72 | 1.08E-08 | 1 | 0.001 | 0.658 | rs62062288 | 9 | MAPT               | 0 | intronic  | 10.20 | 5  | 4 |
| rs62061713  | 17 | 44010405 | a | g | 5.72  | 1.08E-08 | 1 | 0.001 | 0.659 | rs62062288 | 9 | MAPT               | 0 | intronic  | 1.73  | 5  | 1 |
| rs62063297  | 17 | 44047804 | a | t | 5.72  | 1.08E-08 | 1 | 0.001 | 0.660 | rs62062288 | 9 | MAPT               | 0 | intronic  | 1.65  | 7  | 4 |
| rs62063846  | 17 | 44071674 | a | g | 5.72  | 1.08E-08 | 1 | 0.001 | 0.657 | rs62062288 | 9 | MAPT               | 0 | intronic  | 1.51  | 2b | 4 |
| rs55739025  | 17 | 44085201 | t | c | -5.72 | 1.08E-08 | 1 | 0.001 | 0.659 | rs62062288 | 9 | MAPT               | 0 | intronic  | 6.86  | 7  | 4 |
| rs17652121  | 17 | 44073973 | t | c | 5.72  | 1.08E-08 | 1 | 0.001 | 0.662 | rs62062288 | 9 | MAPT               | 0 | exonic    | 2.53  | 1f | 4 |
| rs78136862  | 17 | 44085743 | t | c | 5.72  | 1.08E-08 | 1 | 0.001 | 0.656 | rs62062288 | 9 | MAPT               | 0 | intronic  | 0.55  | 7  | 5 |
| rs62062275  | 17 | 44093496 | a | g | 5.72  | 1.08E-08 | 1 | 0.001 | 0.663 | rs62062288 | 9 | MAPT               | 0 | intronic  | 0.08  | 5  | 1 |
| rs1052587   | 17 | 44102604 | t | c | 5.72  | 1.08E-08 | 1 | 0.001 | 0.660 | rs62062288 | 9 | MAPT               | 0 | UTR3      | 6.78  | 1f | 4 |
| rs62061714  | 17 | 44010452 | a | g | -5.72 | 1.08E-08 | 1 | 0.001 | 0.672 | rs62062288 | 9 | MAPT               | 0 | intronic  | 0.27  | 5  | 1 |
| rs62062791  | 17 | 44025271 | a | g | -5.72 | 1.08E-08 | 1 | 0.001 | 0.668 | rs62062288 | 9 | MAPT               | 0 | intronic  | 8.94  | 5  | 5 |
| rs62062276  | 17 | 44093627 | a | g | 5.72  | 1.08E-08 | 1 | 0.001 | 0.668 | rs62062288 | 9 | MAPT               | 0 | intronic  | 2.76  | 6  | 4 |
| rs62062278  | 17 | 44093860 | a | g | 5.72  | 1.08E-08 | 1 | 0.001 | 0.671 | rs62062288 | 9 | MAPT               | 0 | intronic  | 2.03  | 7  | 5 |
| rs62062281  | 17 | 44094112 | a | g | 5.72  | 1.08E-08 | 1 | 0.001 | 0.666 | rs62062288 | 9 | MAPT               | 0 | intronic  | 1.62  | 7  | 5 |
| rs62062282  | 17 | 44094374 | a | g | 5.72  | 1.08E-08 | 1 | 0.001 | 0.664 | rs62062288 | 9 | MAPT               | 0 | intronic  | 3.79  | 5  | 5 |
| rs2316948   | 17 | 44159466 | t | c | 5.72  | 1.08E-08 | 1 | 0.001 | 0.673 | rs62062288 | 9 | MAPT               | 0 | intronic  | 1.00  | 6  | 5 |
| rs62062283  | 17 | 44095055 | a | c | -5.72 | 1.08E-08 | 1 | 0.001 | 0.669 | rs62062288 | 9 | MAPT               | 0 | intronic  | 12.42 | 6  | 5 |
| rs1117253   | 17 | 44149297 | a | c | 5.72  | 1.08E-08 | 1 | 0.001 | 0.670 | rs62062288 | 9 | KANSL1             | 0 | intronic  | 0.22  | 1f | 4 |
| rs62056803  | 17 | 43982159 | a | g | 5.72  | 1.0      |   |       |       |            |   |                    |   |           |       |    |   |

|             |    |          |   |   |       |          |   |       |       |            |   |        |     |           |       |    |   |
|-------------|----|----------|---|---|-------|----------|---|-------|-------|------------|---|--------|-----|-----------|-------|----|---|
| rs76357066  | 17 | 44067046 | a | g | -5.72 | 1.08E-08 | 1 | 0.001 | 0.723 | rs62062288 | 9 | MAPT   | 0   | intronic  | 0.39  | 5  | 4 |
| rs79447161  | 17 | 44067508 | a | g | 5.72  | 1.08E-08 | 1 | 0.001 | 0.729 | rs62062288 | 9 | MAPT   | 0   | intronic  | 0.26  | 5  | 4 |
| rs17651754  | 17 | 44067546 | t | c | -5.72 | 1.08E-08 | 1 | 0.001 | 0.725 | rs62062288 | 9 | MAPT   | 0   | intronic  | 4.58  | 11 | 4 |
| rs111625094 | 17 | 44067831 | t | c | 5.72  | 1.08E-08 | 1 | 0.001 | 0.722 | rs62062288 | 9 | MAPT   | 0   | intronic  | 2.84  | 7  | 4 |
| rs75743061  | 17 | 44068112 | c | g | 5.72  | 1.08E-08 | 1 | 0.001 | 0.726 | rs62062288 | 9 | MAPT   | 0   | intronic  | 2.43  | 5  | 4 |
| rs62063795  | 17 | 44068238 | t | c | -5.72 | 1.08E-08 | 1 | 0.001 | 0.727 | rs62062288 | 9 | MAPT   | 0   | intronic  | 0.84  | 4  | 4 |
| rs62063796  | 17 | 44068289 | a | g | -5.72 | 1.08E-08 | 1 | 0.001 | 0.717 | rs62062288 | 9 | MAPT   | 0   | intronic  | 1.40  | 4  | 4 |
| rs62063797  | 17 | 44068294 | c | g | -5.72 | 1.08E-08 | 1 | 0.001 | 0.724 | rs62062288 | 9 | MAPT   | 0   | intronic  | 1.58  | 4  | 4 |
| rs62063798  | 17 | 44068543 | a | g | -5.72 | 1.08E-08 | 1 | 0.001 | 0.732 | rs62062288 | 9 | MAPT   | 0   | intronic  | 1.52  | 3a | 4 |
| rs1052551   | 17 | 44068924 | a | g | -5.72 | 1.08E-08 | 1 | 0.001 | 0.731 | rs62062288 | 9 | MAPT   | 0   | exonic    | 11.46 | 5  | 4 |
| rs62064671  | 17 | 44068100 | t | c | 5.72  | 1.08E-08 | 1 | 0.001 | 0.734 | rs62062288 | 9 | MAPT   | 0   | intronic  | 1.22  | 5  | 5 |
| rs974293    | 17 | 44150233 | a | g | -5.72 | 1.08E-08 | 1 | 0.001 | 0.721 | rs62062288 | 9 | KANSL1 | 0   | intronic  | 2.43  | 2  | 2 |
| rs974291    | 17 | 44150480 | a | t | 5.72  | 1.08E-08 | 1 | 0.001 | 0.719 | rs62062288 | 9 | KANSL1 | 0   | intronic  | 0.98  | 2b | 2 |
| rs62062292  | 17 | 44098989 | a | t | 5.72  | 1.08E-08 | 1 | 0.001 | 0.738 | rs62062288 | 9 | MAPT   | 0   | intronic  | 1.13  | 7  | 4 |
| rs77747656  | 17 | 44098927 | c | g | 5.72  | 1.08E-08 | 1 | 0.001 | 0.739 | rs62062288 | 9 | MAPT   | 0   | intronic  | 1.55  | 6  | 4 |
| rs62062297  | 17 | 44101004 | a | g | 5.72  | 1.08E-08 | 1 | 0.001 | 0.737 | rs62062288 | 9 | MAPT   | 0   | intronic  | 1.02  | 6  | 4 |
| rs62063292  | 17 | 44043636 | t | c | -5.72 | 1.08E-08 | 1 | 0.001 | 0.746 | rs62062288 | 9 | MAPT   | 0   | intronic  | 11.59 | 6  | 2 |
| rs62063293  | 17 | 44043819 | a | g | -5.72 | 1.08E-08 | 1 | 0.001 | 0.745 | rs62062288 | 9 | MAPT   | 0   | intronic  | 1.50  | 7  | 2 |
| rs17650973  | 17 | 44044220 | a | t | 5.72  | 1.08E-08 | 1 | 0.001 | 0.742 | rs62062288 | 9 | MAPT   | 0   | intronic  | 2.09  | 1f | 5 |
| rs75145092  | 17 | 44044923 | a | t | -5.72 | 1.08E-08 | 1 | 0.001 | 0.740 | rs62062288 | 9 | MAPT   | 0   | intronic  | 2.72  | 5  | 2 |
| rs77513497  | 17 | 44045474 | a | g | 5.72  | 1.08E-08 | 1 | 0.001 | 0.743 | rs62062288 | 9 | MAPT   | 0   | intronic  | 1.85  | 6  | 4 |
| rs75242405  | 17 | 44049329 | t | c | -5.72 | 1.08E-08 | 1 | 0.001 | 0.744 | rs62062288 | 9 | MAPT   | 0   | intronic  | 8.41  | 2b | 2 |
| rs16940799  | 17 | 44102933 | t | c | 5.72  | 1.08E-08 | 1 | 0.001 | 0.741 | rs62062288 | 9 | MAPT   | 0   | UTR3      | 0.43  | 1f | 4 |
| rs75617973  | 17 | 43983159 | t | c | 5.72  | 1.08E-08 | 1 | 0.001 | 0.755 | rs62062288 | 9 | MAPT   | 0   | intronic  | 2.68  | 5  | 5 |
| rs62063295  | 17 | 44054431 | a | c | -5.72 | 1.08E-08 | 1 | 0.001 | 0.753 | rs62062288 | 9 | MAPT   | 0   | intronic  | 18.79 | 5  | 5 |
| rs17650961  | 17 | 44044508 | a | c | -5.72 | 1.08E-08 | 1 | 0.001 | 0.751 | rs62062288 | 9 | MAPT   | 0   | intronic  | 1.18  | 1f | 5 |
| rs113857334 | 17 | 44044940 | t | c | 5.72  | 1.08E-08 | 1 | 0.001 | 0.756 | rs62062288 | 9 | MAPT   | 0   | intronic  | 1.32  | 5  | 2 |
| rs10445371  | 17 | 44065410 | a | g | -5.72 | 1.08E-08 | 1 | 0.001 | 0.747 | rs62062288 | 9 | MAPT   | 0   | intronic  | 4.26  | 1f | 4 |
| rs919464    | 17 | 44065901 | t | c | -5.72 | 1.08E-08 | 1 | 0.001 | 0.757 | rs62062288 | 9 | MAPT   | 0   | intronic  | 1.14  | 1b | 2 |
| rs113316734 | 17 | 44084157 | t | c | 5.72  | 1.08E-08 | 1 | 0.001 | 0.750 | rs62062288 | 9 | MAPT   | 0   | intronic  | 0.33  | 6  | 4 |
| rs62062296  | 17 | 44100916 | a | g | -5.72 | 1.08E-08 | 1 | 0.001 | 0.748 | rs62062288 | 9 | MAPT   | 0   | intronic  | 0.33  | 6  | 4 |
| rs62063686  | 17 | 44132458 | a | g | -5.72 | 1.08E-08 | 1 | 0.001 | 0.754 | rs62062288 | 9 | KANSL1 | 0   | intronic  | 3.73  | 6  | 5 |
| rs17577447  | 17 | 44194381 | a | t | -5.72 | 1.08E-08 | 1 | 0.001 | 0.753 | rs62062288 | 9 | KANSL1 | 0   | intronic  | 10.93 | 1f | 4 |
| rs17577975  | 17 | 44210442 | t | c | -5.72 | 1.08E-08 | 1 | 0.001 | 0.749 | rs62062288 | 9 | MAPT   | 0   | intronic  | 8.30  | 5  | 2 |
| rs62056795  | 17 | 43979041 | t | c | -5.72 | 1.08E-08 | 1 | 0.001 | 0.759 | rs62062288 | 9 | MAPT   | 0   | intronic  | 6.07  | 2a | 5 |
| rs62062786  | 17 | 44027316 | a | g | -5.72 | 1.08E-08 | 1 | 0.001 | 0.760 | rs62062288 | 9 | MAPT   | 0   | UTR5      | 3.56  | 1f | 3 |
| rs17672261  | 17 | 44052009 | t | c | 5.72  | 1.08E-08 | 1 | 0.001 | 0.758 | rs62062288 | 9 | MAPT   | 0   | exonic    | 9.93  | 1f | 4 |
| rs10445337  | 17 | 44067400 | t | c | 5.72  | 1.08E-08 | 1 | 0.001 | 0.759 | rs62062288 | 9 | MAPT   | 0   | intronic  | 6.33  | 1f | 2 |
| rs17681027  | 17 | 44193097 | a | c | -5.72 | 1.08E-08 | 1 | 0.001 | 0.761 | rs62062288 | 9 | KANSL1 | 0   | intronic  | 6.33  | 1f | 2 |
| rs112206871 | 17 | 44041817 | a | g | 5.72  | 1.08E-08 | 1 | 0.001 | 0.765 | rs62062288 | 9 | MAPT   | 0   | intronic  | 0.09  | 6  | 4 |
| rs17572248  | 17 | 44048687 | t | c | 5.72  | 1.08E-08 | 1 | 0.001 | 0.763 | rs62062288 | 9 | MAPT   | 0   | intronic  | 11.89 | 1f | 4 |
| rs62062295  | 17 | 44052909 | a | g | 5.72  | 1.08E-08 | 1 | 0.001 | 0.767 | rs62062288 | 9 | MAPT   | 0   | intronic  | 0.72  | 2  | 4 |
| rs55881134  | 17 | 44109248 | a | g | -5.72 | 1.08E-08 | 1 | 0.001 | 0.766 | rs62062288 | 9 | KANSL1 | 0   | intronic  | 3.48  | 5  | 3 |
| rs1476554   | 17 | 44159102 | t | c | -5.72 | 1.08E-08 | 1 | 0.001 | 0.764 | rs62062288 | 9 | KANSL1 | 0   | intronic  | 2.86  | 4  | 4 |
| rs55987700  | 17 | 44181146 | t | g | 5.72  | 1.08E-08 | 1 | 0.001 | 0.762 | rs62062288 | 9 | KANSL1 | 0   | intronic  |       |    |   |
| rs17649571  | 17 | 43994952 | a | g | 5.72  | 1.08E-08 | 1 | 0.001 | 0.769 | rs62062288 | 9 | MAPT   | 0   | intronic  | 4.08  | 1f | 4 |
| rs1529534   | 17 | 44029340 | a | g | 5.72  | 1.08E-08 | 1 | 0.001 | 0.770 | rs62062288 | 9 | MAPT   | 0   | intronic  | 5.09  | 5  | 4 |
| rs77138434  | 17 | 44159552 | a | g | -5.72 | 1.08E-08 | 1 | 0.001 | 0.768 | rs62062288 | 9 | KANSL1 | 0   | intronic  | 3.58  | 7  | 4 |
| rs111913701 | 17 | 44159631 | t | g | 5.72  | 1.08E-08 | 1 | 0.001 | 0.771 | rs62062288 | 9 | KANSL1 | 0   | intronic  | 3.58  | 7  | 4 |
| rs1467962   | 17 | 43978604 | a | g | 5.72  | 1.08E-08 | 1 | 0.001 | 0.773 | rs62062288 | 9 | MAPT   | 0   | intronic  | 2.20  | 2b | 5 |
| rs1560311   | 17 | 43978625 | t | c | 5.72  | 1.08E-08 | 1 | 0.001 | 0.772 | rs62062288 | 9 | MAPT   | 0   | intronic  | 0.65  | 4  | 5 |
| rs62062294  | 17 | 44100686 | a | t | 5.72  | 1.08E-08 | 1 | 0.001 | 0.774 | rs62062288 | 9 | MAPT   | 0   | intronic  | 1.42  | 5  | 4 |
| rs974295    | 17 | 44150151 | t | c | 5.72  | 1.08E-08 | 1 | 0.001 | 0.779 | rs62062288 | 9 | KANSL1 | 0   | intronic  | 1.13  | 7  | 4 |
| rs111519055 | 17 | 44159672 | a | t | -5.72 | 1.08E-08 | 1 | 0.001 | 0.777 | rs62062288 | 9 | KANSL1 | 0   | intronic  | 5.04  | 5  | 4 |
| rs77925835  | 17 | 44159695 | t | c | -5.72 | 1.08E-08 | 1 | 0.001 | 0.776 | rs62062288 | 9 | KANSL1 | 0   | intronic  | 0.49  | 4  | 4 |
| rs17659953  | 17 | 44159725 | t | c | -5.72 | 1.08E-08 | 1 | 0.001 | 0.778 | rs62062288 | 9 | KANSL1 | 0   | intronic  | 12.33 | 4  | 4 |
| rs17576165  | 17 | 44159849 | a | t | -5.72 | 1.08E-08 | 1 | 0.001 | 0.775 | rs62062288 | 9 | KANSL1 | 0   | exonic    | 7.65  | 5  | 3 |
| rs62056800  | 17 | 43979468 | a | t | -5.72 | 1.08E-08 | 1 | 0.001 | 0.780 | rs62062288 | 9 | MAPT   | 0   | intronic  | 5.43  | 7  | 5 |
| rs11384264  | 17 | 43979622 | a | g | -5.72 | 1.08E-08 | 1 | 0.001 | 0.782 | rs62062288 | 9 | MAPT   | 0   | intronic  | 7.97  | 5  | 5 |
| rs2099151   | 17 | 43979822 | a | t | 5.72  | 1.08E-08 | 1 | 0.001 | 0.781 | rs62062288 | 9 | MAPT   | 0   | intronic  | 1.51  | 6  | 5 |
| rs62056804  | 17 | 43982286 | t | c | -5.72 | 1.08E-08 | 1 | 0.001 | 0.780 | rs62062288 | 9 | MAPT   | 0   | intronic  | 2.12  | 5  | 5 |
| rs62056796  | 17 | 43978120 | a | g | 5.72  | 1.08E-08 | 1 | 0.001 | 0.785 | rs62062288 | 9 | MAPT   | 0   | intronic  | 3.72  | 5  | 2 |
| rs1467963   | 17 | 43978934 | t | g | 5.72  | 1.08E-08 | 1 | 0.001 | 0.786 | rs62062288 | 9 | MAPT   | 0   | intronic  | 11.45 | 5  | 5 |
| rs1984937   | 17 | 43982531 | a | c | -5.72 | 1.08E-08 | 1 | 0.001 | 0.787 | rs62062288 | 9 | MAPT   | 0   | intronic  | 0.43  | 2  | 2 |
| rs62056802  | 17 | 43980762 | a | g | 5.72  | 1.08E-08 | 1 | 0.001 | 0.783 | rs62062288 | 9 | MAPT   | 0   | intronic  | 4.76  | 5  | 2 |
| rs62063294  | 17 | 44044157 | a | g | -5.72 | 1.08E-08 | 1 | 0.001 | 0.788 | rs62062288 | 9 | MAPT   | 0   | intronic  | 2.45  | 6  | 5 |
| rs62063853  | 17 | 44074613 | a | g | 5.72  | 1.08E-08 | 1 | 0.001 | 0.784 | rs62062288 | 9 | MAPT   | 0   | intronic  | 0.51  | 5  | 4 |
| rs17652748  | 17 | 44103816 | t | c | -5.72 | 1.08E-08 | 1 | 0.001 | 0.789 | rs62062288 | 9 | MAPT   | 0   | UTR3      | 4.54  | 1f | 4 |
| rs17651463  | 17 | 44103861 | a | c | -5.72 | 1.08E-08 | 1 | 0.001 | 0.790 | rs62062288 | 9 | MAPT   | 0   | intronic  | 4.60  | 1f | 4 |
| rs62063793  | 17 | 44050212 | t | c | -5.72 | 1.08E-08 | 1 | 0.001 | 0.791 | rs62062288 | 9 | MAPT   | 0   | intronic  | 8.82  | 4  | 4 |
| rs75534191  | 17 | 44091724 | a | g | -5.72 | 1.08E-08 | 1 | 0.001 | 0.793 | rs62062288 | 9 | MAPT   | 0   | intronic  | 6.76  | 5  | 2 |
| rs17574228  | 17 | 44104509 | t | c | 5.72  | 1.08E-08 | 1 | 0.001 | 0.794 | rs62062288 | 9 | MAPT   | 0   | UTR3      | 2.43  | 1f | 4 |
| rs78229689  | 17 | 44106806 | a | g | -5.72 | 1.08E-08 | 1 | 0.001 | 0.795 | rs62062288 | 9 | KANSL1 | 475 | Jowntrean | 1.71  | 5  | 4 |
| rs12150561  | 17 | 44159920 | t | c | -5.72 | 1.08E-08 | 1 | 0.001 | 0.792 | rs62062288 | 9 | KANSL1 | 0   | intronic  | 1.33  | 7  | 2 |
| rs11225277  | 17 | 44031958 | a | g | -5.72 | 1.08E-08 | 1 | 0.001 | 0.802 | rs62062288 | 9 | MAPT   | 0   | intronic  | 3.07  | 6  | 5 |
| rs17651134  | 17 | 44050340 | a | g | -5.72 | 1.08E-08 | 1 | 0.001 | 0.799 | rs62062288 | 9 | MAPT   | 0   | UTR5      | 3.96  | 1f | 4 |
| rs62063306  | 17 | 44050395 | a | c | -5.72 | 1.08E-08 | 1 | 0.001 | 0.809 | rs62062288 | 9 | MAPT   | 0   | UTR5      | 3.62  | 5  | 4 |
| rs62063775  | 17 | 44050823 | t | g | -5.72 | 1.08E-08 | 1 | 0.001 | 0.804 | rs62062288 |   |        |     |           |       |    |   |



|             |    |          |   |   |       |          |   |       |       |            |   |                   |   |            |       |    |  |  |   |
|-------------|----|----------|---|---|-------|----------|---|-------|-------|------------|---|-------------------|---|------------|-------|----|--|--|---|
| rs62063675  | 17 | 44126575 | t | c | -5.71 | 1.11E-08 | 1 | 0.001 | 0.848 | rs62062288 | 9 | KANSL1            | 0 | intronic   |       |    |  |  |   |
| rs112197756 | 17 | 44154105 | a | g | 5.71  | 1.11E-08 | 1 | 0.001 | 0.852 | rs62062288 | 9 | KANSL1            | 0 | intronic   | 2.53  | 6  |  |  | 4 |
| rs73984689  | 17 | 44184404 | a | g | -5.71 | 1.11E-08 | 1 | 0.001 | 0.850 | rs62062288 | 9 | KANSL1            | 0 | intronic   | 5.83  | 5  |  |  | 2 |
| rs62061710  | 17 | 44007727 | t | c | -5.71 | 1.11E-08 | 1 | 0.001 | 0.856 | rs62062288 | 9 | MAPT              | 0 | intronic   |       |    |  |  |   |
| rs76154201  | 17 | 44154033 | t | c | 5.71  | 1.11E-08 | 1 | 0.001 | 0.853 | rs62062288 | 9 | KANSL1            | 0 | intronic   |       |    |  |  |   |
| rs75530705  | 17 | 44154048 | t | c | -5.71 | 1.11E-08 | 1 | 0.001 | 0.855 | rs62062288 | 9 | KANSL1            | 0 | intronic   |       |    |  |  |   |
| rs62060845  | 17 | 44154393 | a | g | 5.71  | 1.11E-08 | 1 | 0.001 | 0.853 | rs62062288 | 9 | KANSL1            | 0 | intronic   | 0.36  | 6  |  |  | 1 |
| rs62060846  | 17 | 44154441 | a | c | 5.71  | 1.11E-08 | 1 | 0.001 | 0.854 | rs62062288 | 9 | KANSL1            | 0 | intronic   | 0.49  | 5  |  |  | 2 |
| rs74431389  | 17 | 44154607 | t | c | 5.71  | 1.11E-08 | 1 | 0.001 | 0.857 | rs62062288 | 9 | KANSL1            | 0 | intronic   | 4.42  | 5  |  |  | 4 |
| rs62056837  | 17 | 43988884 | t | c | 5.71  | 1.11E-08 | 1 | 0.001 | 0.859 | rs62062288 | 9 | MAPT              | 0 | intronic   | 1.31  | 7  |  |  | 5 |
| rs62060837  | 17 | 44152760 | t | g | 5.71  | 1.11E-08 | 1 | 0.001 | 0.858 | rs62062288 | 9 | KANSL1            | 0 | intronic   |       |    |  |  |   |
| rs242561    | 17 | 44026548 | t | c | -5.71 | 1.11E-08 | 1 | 0.001 | 0.861 | rs62062288 | 9 | MAPT              | 0 | intronic   | 14.02 |    |  |  | 1 |
| rs62063304  | 17 | 44049900 | a | g | -5.71 | 1.11E-08 | 1 | 0.001 | 0.860 | rs62062288 | 9 | MAPT              | 0 | intronic   | 7.36  | 4  |  |  | 4 |
| rs62234850  | 17 | 44060248 | a | g | -5.71 | 1.11E-08 | 1 | 0.001 | 0.863 | rs62062288 | 9 | MAPT              | 0 | intronic   | 9.91  | 5  |  |  | 4 |
| rs62064674  | 17 | 44088772 | a | c | -5.71 | 1.11E-08 | 1 | 0.001 | 0.860 | rs62062288 | 9 | MAPT              | 0 | intronic   | 1.98  | 6  |  |  | 4 |
| rs62060847  | 17 | 44154946 | t | c | -5.71 | 1.11E-08 | 1 | 0.001 | 0.865 | rs62062288 | 9 | KANSL1            | 0 | intronic   | 1.87  | 7  |  |  | 4 |
| rs56100031  | 17 | 44155157 | t | c | -5.71 | 1.11E-08 | 1 | 0.001 | 0.862 | rs62062288 | 9 | KANSL1            | 0 | intronic   | 2.77  | 6  |  |  | 4 |
| rs9944484   | 17 | 43990662 | a | g | -5.71 | 1.11E-08 | 1 | 0.001 | 0.866 | rs62062288 | 9 | MAPT              | 0 | intronic   | 1.74  | 7  |  |  | 4 |
| rs62063790  | 17 | 44062915 | t | g | -5.71 | 1.11E-08 | 1 | 0.001 | 0.868 | rs62062288 | 9 | MAPT              | 0 | intronic   | 6.15  |    |  |  | 4 |
| rs5623513   | 17 | 44176215 | a | g | -5.71 | 1.11E-08 | 1 | 0.001 | 0.867 | rs62062288 | 9 | KANSL1            | 0 | intronic   |       |    |  |  |   |
| rs17571781  | 17 | 44033802 | t | c | 5.71  | 1.11E-08 | 1 | 0.001 | 0.870 | rs62062288 | 9 | MAPT              | 0 | intronic   | 0.59  | 1d |  |  | 5 |
| rs77527347  | 17 | 44058017 | t | g | -5.71 | 1.11E-08 | 1 | 0.001 | 0.868 | rs62062288 | 9 | MAPT              | 0 | intronic   | 0.16  | 5  |  |  | 5 |
| rs78938131  | 17 | 44157622 | t | c | -5.71 | 1.11E-08 | 1 | 0.001 | 0.869 | rs62062288 | 9 | KANSL1            | 0 | intronic   | 0.34  | 4  |  |  | 4 |
| rs62061706  | 17 | 44008896 | t | c | 5.71  | 1.11E-08 | 1 | 0.001 | 0.872 | rs62062288 | 9 | MAPT              | 0 | intronic   | 0.73  | 4  |  |  | 5 |
| rs2116954   | 17 | 44159167 | a | g | -5.71 | 1.11E-08 | 1 | 0.001 | 0.871 | rs62062288 | 9 | KANSL1            | 0 | intronic   |       |    |  |  |   |
| rs73723223  | 17 | 44089108 | t | c | 5.71  | 1.11E-08 | 1 | 0.001 | 0.874 | rs62062288 | 9 | MAPT              | 0 | intronic   | 2.34  | 5  |  |  | 4 |
| rs62062280  | 17 | 44093993 | t | c | -5.71 | 1.11E-08 | 1 | 0.001 | 0.873 | rs62062288 | 9 | MAPT              | 0 | intronic   |       |    |  |  |   |
| rs55907036  | 17 | 44042366 | a | g | -5.71 | 1.12E-08 | 1 | 0.001 | 0.876 | rs62062288 | 9 | MAPT              | 0 | intronic   | 3.18  | 5  |  |  | 4 |
| rs12150170  | 17 | 44090646 | a | g | 5.71  | 1.12E-08 | 1 | 0.001 | 0.875 | rs62062288 | 9 | MAPT              | 0 | intronic   | 2.37  | 1d |  |  | 2 |
| rs76159289  | 17 | 44098861 | t | g | -5.71 | 1.12E-08 | 1 | 0.001 | 0.877 | rs62062288 | 9 | MAPT              | 0 | intronic   |       |    |  |  |   |
| rs62062776  | 17 | 44022043 | t | c | -5.71 | 1.12E-08 | 1 | 0.001 | 0.879 | rs62062288 | 9 | MAPT              | 0 | intronic   | 2.72  | 5  |  |  | 4 |
| rs75412750  | 17 | 44172773 | t | c | -5.71 | 1.12E-08 | 1 | 0.001 | 0.878 | rs62062288 | 9 | KANSL1            | 0 | intronic   | 3.82  | 7  |  |  | 4 |
| rs56226437  | 17 | 44042361 | t | c | 5.71  | 1.12E-08 | 1 | 0.001 | 0.880 | rs62062288 | 9 | MAPT              | 0 | intronic   | 1.71  | 5  |  |  | 4 |
| rs62063786  | 17 | 44061023 | a | g | -5.71 | 1.12E-08 | 1 | 0.001 | 0.881 | rs62062288 | 9 | MAPT              | 0 | exonic     | 7.65  | 5  |  |  | 4 |
| rs12150229  | 17 | 44015446 | a | g | -5.71 | 1.13E-08 | 1 | 0.001 | 0.882 | rs62062288 | 9 | MAPT              | 0 | intronic   | 1.45  | 6  |  |  | 5 |
| rs1150310   | 17 | 43978534 | a | g | -5.71 | 1.13E-08 | 1 | 0.001 | 0.882 | rs62062288 | 9 | MAPT              | 0 | intronic   | 69    | 1f |  |  | 2 |
| rs17652449  | 17 | 44088937 | a | c | -5.71 | 1.13E-08 | 1 | 0.001 | 0.884 | rs62062288 | 9 | MAPT              | 0 | intronic   | 1.03  | 1f |  |  | 4 |
| rs17659881  | 17 | 44157597 | a | g | 5.71  | 1.13E-08 | 1 | 0.001 | 0.883 | rs62062288 | 9 | KANSL1            | 0 | intronic   | 3.53  | 1d |  |  | 4 |
| rs79180862  | 17 | 44131798 | t | c | -5.71 | 1.13E-08 | 1 | 0.001 | 0.885 | rs62062288 | 9 | KANSL1            | 0 | intronic   | 12.88 | 5  |  |  | 4 |
| rs754513    | 17 | 44055638 | a | t | -5.71 | 1.13E-08 | 1 | 0.001 | 0.887 | rs62062288 | 9 | MAPT              | 0 | UTRS       | 7.22  | 3a |  |  | 4 |
| rs17572627  | 17 | 44058629 | a | t | -5.71 | 1.13E-08 | 1 | 0.001 | 0.886 | rs62062288 | 9 | MAPT              | 0 | intronic   | 5.97  | 1f |  |  | 4 |
| rs70703338  | 17 | 44053487 | t | g | -5.71 | 1.13E-08 | 1 | 0.001 | 0.887 | rs62062288 | 9 | MAPT              | 0 | intronic   |       |    |  |  |   |
| rs74573628  | 17 | 43982961 | t | c | 5.71  | 1.13E-08 | 1 | 0.001 | 0.889 | rs62062288 | 9 | MAPT              | 0 | intronic   | 11.37 | 5  |  |  | 5 |
| rs17571718  | 17 | 44032768 | t | c | 5.71  | 1.13E-08 | 1 | 0.001 | 0.890 | rs62062288 | 9 | MAPT              | 0 | intronic   | 4.26  | 1f |  |  | 5 |
| rs3912063   | 17 | 44165049 | a | g | 5.71  | 1.13E-08 | 1 | 0.001 | 0.891 | rs62062288 | 9 | KANSL1            | 0 | intronic   | 2.38  | 4  |  |  | 4 |
| rs62056805  | 17 | 43983383 | a | g | -5.71 | 1.14E-08 | 1 | 0.001 | 0.892 | rs62062288 | 9 | MAPT              | 0 | intronic   | 0.33  | 2b |  |  | 2 |
| rs12150254  | 17 | 44098455 | t | c | 5.71  | 1.14E-08 | 1 | 0.001 | 0.893 | rs62062288 | 9 | MAPT              | 0 | intronic   | 0.75  | 2  |  |  | 2 |
| rs3912062   | 17 | 44165066 | t | c | 5.71  | 1.14E-08 | 1 | 0.001 | 0.894 | rs62062288 | 9 | KANSL1            | 0 | intronic   | 0.87  | 4  |  |  | 4 |
| rs77084869  | 17 | 43982903 | a | g | 5.71  | 1.14E-08 | 1 | 0.001 | 0.894 | rs62062288 | 9 | MAPT              | 0 | intronic   | 2.05  | 6  |  |  | 5 |
| rs111957446 | 17 | 44179723 | t | c | 5.71  | 1.14E-08 | 1 | 0.001 | 0.895 | rs62062288 | 9 | KANSL1            | 0 | intronic   |       |    |  |  |   |
| rs62062813  | 17 | 44032956 | a | g | -5.71 | 1.14E-08 | 1 | 0.001 | 0.898 | rs62062288 | 9 | MAPT              | 0 | intronic   | 2.03  | 4  |  |  | 5 |
| rs76618565  | 17 | 44068481 | a | g | -5.71 | 1.14E-08 | 1 | 0.001 | 0.897 | rs62062288 | 9 | MAPT              | 0 | intronic   | 1.52  | 4  |  |  | 4 |
| rs62062283  | 17 | 44012055 | a | g | -5.71 | 1.14E-08 | 1 | 0.001 | 0.896 | rs62062288 | 9 | MAPT              | 0 | intronic   | 11.66 | 5  |  |  | 4 |
| rs61180701  | 17 | 43987601 | t | c | 5.71  | 1.14E-08 | 1 | 0.001 | 0.900 | rs62062288 | 9 | MAPTRP11-669E14.4 | 0 | RNA_intron | 0.49  | 6  |  |  | 5 |
| rs55972730  | 17 | 44155707 | t | c | -5.71 | 1.14E-08 | 1 | 0.001 | 0.899 | rs62062288 | 9 | KANSL1            | 0 | intronic   | 2.73  | 7  |  |  | 2 |
| rs62056810  | 17 | 43984672 | t | c | 5.71  | 1.15E-08 | 1 | 0.001 | 0.901 | rs62062288 | 9 | MAPT              | 0 | intronic   | 2.18  | 5  |  |  | 2 |
| rs76682988  | 17 | 44142334 | t | g | -5.71 | 1.15E-08 | 1 | 0.001 | 0.902 | rs62062288 | 9 | KANSL1            | 0 | intronic   |       |    |  |  |   |
| rs62059079  | 17 | 44061330 | t | c | 5.71  | 1.15E-08 | 1 | 0.001 | 0.904 | rs62062288 | 9 | MAPT              | 0 | intronic   | 0.23  | 6  |  |  | 5 |
| rs62062779  | 17 | 44025277 | a | g | -5.71 | 1.15E-08 | 1 | 0.001 | 0.903 | rs62062288 | 9 | MAPT              | 0 | intronic   | 0.83  | 6  |  |  | 4 |
| rs113201171 | 17 | 44082249 | a | t | 5.71  | 1.16E-08 | 1 | 0.001 | 0.905 | rs62062288 | 9 | MAPT              | 0 | intronic   | 0.77  | 7  |  |  | 5 |
| rs12150260  | 17 | 44090538 | t | g | 5.71  | 1.16E-08 | 1 | 0.001 | 0.904 | rs62062288 | 9 | MAPT              | 0 | intronic   |       |    |  |  |   |
| rs62062803  | 17 | 44028183 | t | c | 5.71  | 1.16E-08 | 1 | 0.001 | 0.906 | rs62062288 | 9 | MAPT              | 0 | intronic   | 2.00  | 7  |  |  | 5 |
| rs754512    | 17 | 44055647 | a | t | 5.70  | 1.17E-08 | 1 | 0.001 | 0.907 | rs62062288 | 9 | MAPT              | 0 | exonic     | 2.39  | 1d |  |  | 4 |
| rs17651083  | 17 | 44058550 | a | g | -5.70 | 1.17E-08 | 1 | 0.001 | 0.908 | rs62062288 | 9 | MAPT              | 0 | intronic   | 3.58  | 1f |  |  | 4 |
| rs62063774  | 17 | 44050463 | t | c | 5.70  | 1.17E-08 | 1 | 0.001 | 0.909 | rs62062288 | 9 | MAPT              | 0 | UTRS       | 1.09  | 5  |  |  | 4 |
| rs78104015  | 17 | 44052733 | a | g | 5.70  | 1.18E-08 | 1 | 0.001 | 0.910 | rs62062288 | 9 | MAPT              | 0 | UTRS       | 1.59  | 4  |  |  | 4 |
| rs62056809  | 17 | 43984669 | a | g | 5.70  | 1.18E-08 | 1 | 0.001 | 0.911 | rs62062288 | 9 | MAPT              | 0 | intronic   | 3.82  | 5  |  |  | 2 |
| rs112003140 | 17 | 43980998 | a | g | -5.70 | 1.18E-08 | 1 | 0.001 | 0.912 | rs62062288 | 9 | MAPT              | 0 | intronic   |       |    |  |  |   |
| rs112423744 | 17 | 44028274 | a | g | 5.70  | 1.19E-08 | 1 | 0.001 | 0.912 | rs62062288 | 9 | MAPT              | 0 | intronic   |       |    |  |  |   |
| rs62280961  | 17 | 44041107 | t | c | -5.70 | 1.19E-08 | 1 | 0.001 | 0.913 | rs62062288 | 9 | MAPT              | 0 | intronic   | 11.61 | 5  |  |  | 4 |
| rs17649553  | 17 | 43984648 | t | c | -5.70 | 1.19E-08 | 1 | 0.001 | 0.915 | rs62062288 | 9 | MAPT              | 0 | intronic   | 0.59  | 4  |  |  | 4 |
| rs62062133  | 17 | 44114372 | t | c | 5.70  | 1.19E-08 | 1 | 0.001 | 0.914 | rs62062288 | 9 | KANSL1            | 0 | intronic   |       |    |  |  |   |
| rs62061717  | 17 | 44012248 | a | t | -5.70 | 1.19E-08 | 1 | 0.001 | 0.916 | rs62062288 | 9 | MAPT              | 0 | intronic   |       |    |  |  |   |
| rs17651549  | 17 | 44061278 | t | c | -5.70 | 1.20E-08 | 1 | 0.001 | 0.917 | rs62062288 | 9 | MAPT              | 0 | exonic     | 34.00 | 1f |  |  | 4 |
| rs62062794  | 17 | 44025455 | t | c | 5.70  | 1.20E-08 | 1 | 0.001 | 0.918 | rs62062288 | 9 | MAPT              | 0 | intronic   | 11.66 |    |  |  |   |

|             |    |           |   |   |       |          |   |       |       |            |    |                    |     |             |       |    |   |
|-------------|----|-----------|---|---|-------|----------|---|-------|-------|------------|----|--------------------|-----|-------------|-------|----|---|
| rs17650842  | 17 | 44037491  | a | g | 5.67  | 1.42E-08 | 1 | 0.001 | 0.963 | rs62062288 | 9  | MAPT               | 0   | intronic    | 0.84  | 6  | 5 |
| rs2163129   | 17 | 44056433  | t | c | 5.67  | 1.42E-08 | 1 | 0.001 | 0.964 | rs62062288 | 9  | MAPT               | 0   | intronic    | 3.16  | 6  | 4 |
| rs2163130   | 17 | 44056434  | a | g | -5.67 | 1.43E-08 | 1 | 0.001 | 0.965 | rs62062288 | 9  | MAPT               | 0   | intronic    | 0.20  | 6  | 4 |
| rs12190125  | 17 | 43986432  | a | g | -5.67 | 1.43E-08 | 1 | 0.001 | 0.966 | rs62062288 | 9  | MAPT,RP11-669E14.4 | 0   | RNA_intron  | 3.19  | 5  | 2 |
| rs2004673   | 17 | 44075099  | t | c | 5.67  | 1.43E-08 | 1 | 0.001 | 0.966 | rs62062288 | 9  | MAPT               | 0   | intronic    | 0.38  | 4  | 4 |
| rs79772576  | 17 | 44106220  | t | c | 5.67  | 1.43E-08 | 1 | 0.001 | 0.967 | rs62062288 | 9  | MAPT               | 519 | Jdownstream | 1.97  | 5  | 4 |
| rs17661015  | 17 | 44192957  | t | c | 5.67  | 1.44E-08 | 1 | 0.001 | 0.968 | rs62062288 | 9  | KANSL1             | 0   | intronic    | 1.40  | 6  | 2 |
| rs79792699  | 17 | 43994252  | t | c | 5.67  | 1.44E-08 | 1 | 0.001 | 0.969 | rs62062288 | 9  | MAPT               | 0   | intronic    | 2.18  | 5  | 4 |
| rs16940806  | 17 | 44103826  | a | g | -5.67 | 1.47E-08 | 1 | 0.001 | 0.969 | rs62062288 | 9  | MAPT               | 0   | UTR3        | 3.70  | 4  | 4 |
| rs2004674   | 17 | 44075110  | a | t | 5.66  | 1.49E-08 | 1 | 0.001 | 0.970 | rs62062288 | 9  | MAPT               | 0   | intronic    | 0.16  | 4  | 4 |
| rs79681971  | 17 | 44106219  | t | c | -5.66 | 1.50E-08 | 1 | 0.001 | 0.971 | rs62062288 | 9  | MAPT               | 518 | Jdownstream | 2.20  | 5  | 4 |
| rs62063852  | 17 | 44074581  | a | g | 5.66  | 1.52E-08 | 1 | 0.001 | 0.971 | rs62062288 | 9  | MAPT               | 0   | intronic    | 1.97  | 5  | 4 |
| rs62063263  | 17 | 44033394  | c | g | -5.66 | 1.53E-08 | 1 | 0.001 | 0.972 | rs62062288 | 9  | MAPT               | 0   | intronic    | 0.06  | 7  | 5 |
| rs5955207   | 17 | 44165594  | a | c | -5.66 | 1.54E-08 | 1 | 0.001 | 0.973 | rs62062288 | 9  | KANSL1             | 0   | intronic    | 1.84  | 2b | 1 |
| rs5735563   | 17 | 44165596  | a | c | -5.66 | 1.54E-08 | 1 | 0.001 | 0.973 | rs62062288 | 9  | KANSL1             | 0   | intronic    | 0.36  | 7  | 2 |
| rs11389432  | 17 | 44080408  | c | g | -5.66 | 1.54E-08 | 1 | 0.001 | 0.974 | rs62062288 | 9  | MAPT               | 0   | intronic    | 0.36  | 7  | 2 |
| rs62062324  | 17 | 44114362  | a | t | 5.65  | 1.57E-08 | 1 | 0.001 | 0.975 | rs62062288 | 9  | MAPT               | 0   | intronic    |       |    |   |
| rs62062325  | 17 | 44114364  | a | c | -5.65 | 1.57E-08 | 1 | 0.001 | 0.975 | rs62062288 | 9  | MAPT               | 0   | intronic    |       |    |   |
| rs62063264  | 17 | 44033401  | t | c | -5.65 | 1.59E-08 | 1 | 0.001 | 0.976 | rs62062288 | 9  | MAPT               | 0   | intronic    | 2.02  | 7  | 5 |
| rs113756354 | 17 | 44013483  | a | g | 5.65  | 1.59E-08 | 1 | 0.001 | 0.977 | rs62062288 | 9  | MAPT               | 0   | intronic    | 1.84  | 2b | 1 |
| rs79857651  | 17 | 44013475  | a | g | -5.65 | 1.59E-08 | 1 | 0.001 | 0.977 | rs62062288 | 9  | MAPT               | 0   | intronic    | 3.69  | 4  | 1 |
| rs55823844  | 17 | 43978320  | a | g | -5.65 | 1.60E-08 | 1 | 0.001 | 0.978 | rs62062288 | 9  | MAPT               | 0   | intronic    | 1.58  | 4  | 5 |
| rs62063780  | 17 | 44056238  | a | g | 5.65  | 1.61E-08 | 1 | 0.001 | 0.979 | rs62062288 | 9  | MAPT               | 0   | intronic    | 2.88  | 7  | 4 |
| rs75944932  | 17 | 44072423  | a | c | 5.65  | 1.62E-08 | 1 | 0.001 | 0.979 | rs62062288 | 9  | MAPT               | 0   | intronic    | 0.01  | 6  | 4 |
| rs20526842  | 17 | 440361515 | t | g | 5.65  | 1.66E-08 | 1 | 0.001 | 0.980 | rs62062288 | 9  | MAPT               | 0   | intronic    |       |    |   |
| rs63022057  | 17 | 44034486  | a | c | 5.64  | 1.69E-08 | 1 | 0.001 | 0.981 | rs62062288 | 9  | MAPT               | 0   | intronic    |       |    |   |
| rs75691066  | 17 | 44045585  | a | c | -5.64 | 1.69E-08 | 1 | 0.001 | 0.981 | rs62062288 | 9  | MAPT               | 0   | intronic    |       |    |   |
| rs62062286  | 17 | 44096486  | t | c | -5.64 | 1.73E-08 | 1 | 0.001 | 0.982 | rs62062288 | 9  | MAPT               | 0   | intronic    | 7.02  | 7  | 4 |
| rs62063278  | 17 | 44036914  | t | c | -5.64 | 1.75E-08 | 1 | 0.001 | 0.982 | rs62062288 | 9  | MAPT               | 0   | intronic    | 4.14  | 5  | 5 |
| rs11203311  | 17 | 44042939  | a | g | -5.64 | 1.75E-08 | 1 | 0.001 | 0.983 | rs62062288 | 9  | MAPT               | 0   | intronic    |       |    |   |
| rs28439143  | 17 | 43987723  | a | g | -5.63 | 1.77E-08 | 1 | 0.001 | 0.984 | rs62062288 | 9  | MAPT,RP11-669E14.4 | 0   | RNA_intron  | 8.21  | 6  | 5 |
| rs62063279  | 17 | 44036936  | a | g | -5.63 | 1.77E-08 | 1 | 0.001 | 0.984 | rs62062288 | 9  | MAPT               | 0   | intronic    | 3.12  | 6  | 5 |
| rs17652337  | 17 | 44083323  | t | c | -5.62 | 1.88E-08 | 1 | 0.001 | 0.985 | rs62062288 | 9  | MAPT               | 0   | intronic    | 5.99  | 6  | 4 |
| rs111751251 | 17 | 44042951  | t | c | -5.62 | 1.88E-08 | 1 | 0.001 | 0.985 | rs62062288 | 9  | MAPT               | 0   | intronic    |       |    |   |
| rs112480703 | 17 | 44189799  | t | c | 5.62  | 1.94E-08 | 1 | 0.001 | 0.986 | rs62062288 | 9  | KANSL1             | 0   | intronic    |       |    |   |
| rs62063280  | 17 | 44037289  | c | g | -5.62 | 1.97E-08 | 1 | 0.001 | 0.986 | rs62062288 | 9  | MAPT               | 0   | intronic    | 11.17 | 7  | 5 |
| rs75330746  | 17 | 44182655  | t | c | -5.61 | 2.03E-08 | 1 | 0.001 | 0.987 | rs62062288 | 9  | MAPT               | 0   | intronic    |       |    |   |
| rs75183956  | 17 | 44182956  | a | g | 5.61  | 2.03E-08 | 1 | 0.001 | 0.988 | rs62062288 | 9  | KANSL1             | 0   | intronic    |       |    |   |
| rs75010486  | 17 | 44103825  | t | c | 5.61  | 2.04E-08 | 1 | 0.001 | 0.988 | rs62062288 | 9  | MAPT               | 0   | UTR3        | 1.59  |    | 4 |
| rs35163442  | 17 | 44023842  | a | g | -5.61 | 2.05E-08 | 1 | 0.001 | 0.989 | rs62062288 | 9  | MAPT               | 0   | intronic    |       |    |   |
| rs62063281  | 17 | 43976308  | t | c | 5.61  | 2.08E-08 | 1 | 0.001 | 0.989 | rs62062288 | 9  | MAPT               | 0   | intronic    |       |    |   |
| rs8712      | 17 | 44101897  | a | c | 5.61  | 2.08E-08 | 1 | 0.001 | 0.990 | rs62062288 | 9  | MAPT               | 0   | UTR3        | 12.96 | 5  | 4 |
| rs468       | 17 | 44101563  | t | c | 5.60  | 2.10E-08 | 1 | 0.001 | 0.990 | rs62062288 | 9  | MAPT               | 0   | UTR3        | 3.44  | 1f | 4 |
| rs492602    | 19 | 49206417  | a | g | -5.57 | 2.53E-08 | 1 | 0.100 | 0.100 | rs492602   | 10 | FUT2               | 0   | exonic      | 0.06  | 6  | 1 |
| rs679574    | 19 | 49206108  | c | g | -5.55 | 2.93E-08 | 1 | 0.086 | 0.186 | rs492602   | 10 | FUT2               | 0   | intronic    | 0.96  | 6  | 4 |
| rs516316    | 19 | 49206145  | c | g | 5.54  | 2.99E-08 | 1 | 0.085 | 0.271 | rs492602   | 10 | FUT2               | 0   | intronic    | 0.78  | 7  | 4 |
| rs516246    | 19 | 49206172  | t | c | 5.52  | 3.49E-08 | 1 | 0.073 | 0.344 | rs492602   | 10 | FUT2               | 0   | intronic    | 3.08  | 4  | 4 |
| rs681343    | 19 | 49206200  | a | g | 5.50  | 3.78E-08 | 1 | 0.068 | 0.412 | rs492602   | 10 | FUT2               | 0   | exonic      | 5.16  | 5  | 4 |
| rs601338    | 19 | 49206674  | a | g | 5.46  | 4.87E-08 | 1 | 0.053 | 0.465 | rs492602   | 10 | FUT2               | 0   | exonic      | 37.00 | 5  | 4 |
| rs2287921   | 19 | 49228272  | t | c | -5.34 | 9.53E-08 | 1 | 0.028 | 0.493 | rs492602   | 10 | RASIP1             | 0   | intronic    | 3.37  | 4  | 4 |
| rs12979891  | 19 | 49227256  | t | c | 5.33  | 9.96E-08 | 1 | 0.026 | 0.519 | rs492602   | 10 | RASIP1             | 0   | intronic    | 0.69  | 7  | 4 |
| rs11666792  | 19 | 49227043  | a | g | 5.32  | 1.02E-07 | 1 | 0.026 | 0.545 | rs492602   | 10 | RASIP1             | 0   | intronic    | 13.88 | 5  | 4 |
| rs11673906  | 19 | 49227443  | t | c | 5.32  | 1.05E-07 | 1 | 0.025 | 0.570 | rs492602   | 10 | RASIP1             | 0   | intronic    | 1.95  | 5  | 4 |
| rs2287922   | 19 | 49232226  | a | g | 5.29  | 1.22E-07 | 1 | 0.022 | 0.592 | rs492602   | 10 | RASIP1             | 0   | exonic      | 32.00 | 4  | 4 |
| rs35106244  | 19 | 49203829  | t | c | 5.29  | 1.23E-07 | 1 | 0.022 | 0.613 | rs492602   | 10 | FUT2               | 0   | intronic    |       |    |   |
| rs8112983   | 19 | 49229525  | t | c | -5.29 | 1.25E-07 | 1 | 0.021 | 0.635 | rs492602   | 10 | RASIP1             | 0   | intronic    | 2.68  | 7  | 4 |
| rs838144    | 19 | 49250239  | t | c | -5.25 | 1.53E-07 | 1 | 0.017 | 0.652 | rs492602   | 10 | IZUMO1             | 72  | upstream    | 7.66  | 4  | 4 |
| rs29400014  | 19 | 49250557  | c | g | 5.25  | 1.56E-07 | 1 | 0.017 | 0.669 | rs492602   | 10 | IZUMO1             | 490 | jam_downs   | 5.73  | 4  | 4 |
| rs106205    | 19 | 49250197  | t | c | 5.21  | 1.69E-07 | 1 | 0.014 | 0.683 | rs492602   | 10 | IZUMO1             | 30  | upstream    | 4.60  | 4  | 4 |
| rs11667321  | 19 | 49250538  | a | g | 5.20  | 1.96E-07 | 1 | 0.014 | 0.697 | rs492602   | 10 | IZUMO1             | 371 | jam_downs   | 5.89  | 4  | 4 |
| rs479486    | 19 | 49229323  | a | g | 5.20  | 1.98E-07 | 1 | 0.014 | 0.710 | rs492602   | 10 | RASIP1             | 0   | intronic    | 1.77  | 6  | 4 |
| rs11882796  | 19 | 49225766  | a | t | -5.18 | 2.21E-07 | 1 | 0.012 | 0.723 | rs492602   | 10 | RASIP1             | 0   | intronic    | 0.10  | 7  | 4 |
| rs383147    | 19 | 49248866  | a | g | 5.16  | 2.49E-07 | 1 | 0.011 | 0.734 | rs492602   | 10 | IZUMO1             | 0   | intronic    | 2.93  | 4  | 4 |
| rs513751    | 19 | 49244966  | a | c | -5.13 | 2.93E-07 | 1 | 0.009 | 0.743 | rs492602   | 10 | RASIP1             | 0   | intronic    | 4.71  | 5  | 4 |
| rs3859439   | 19 | 49224389  | t | c | -5.12 | 3.13E-07 | 1 | 0.009 | 0.752 | rs492602   | 10 | RASIP1             | 0   | intronic    | 3.40  | 2b | 4 |
| rs418464    | 19 | 49239026  | t | c | -5.11 | 3.23E-07 | 1 | 0.008 | 0.760 | rs492602   | 10 | RASIP1             | 0   | intronic    | 0.91  | 7  | 4 |
| rs1231281   | 19 | 49239200  | a | g | 5.11  | 3.27E-07 | 1 | 0.008 | 0.768 | rs492602   | 10 | RASIP1             | 0   | intronic    | 0.03  | 7  | 4 |
| rs973579    | 19 | 49241976  | a | g | -5.10 | 3.33E-07 | 1 | 0.008 | 0.777 | rs492602   | 10 | RASIP1             | 0   | intronic    | 5.19  | 1f | 4 |
| rs632111    | 19 | 49208978  | a | g | -5.10 | 3.34E-07 | 1 | 0.008 | 0.785 | rs492602   | 10 | FUT2               | 0   | UTR3        | 3.79  | 6  | 4 |
| rs603985    | 19 | 49207257  | t | c | -5.09 | 3.57E-07 | 1 | 0.008 | 0.807 | rs492602   | 10 | FUT2               | 0   | UTR3        | 4.02  | 6  | 4 |
| rs2251034   | 19 | 49207792  | a | g | 5.09  | 3.57E-07 | 1 | 0.008 | 0.800 | rs492602   | 10 | FUT2               | 0   | UTR3        | 0.04  | 7  | 4 |
| rs485073    | 19 | 49207255  | a | g | -5.09 | 3.65E-07 | 1 | 0.008 | 0.808 | rs492602   | 10 | FUT2               | 0   | UTR3        | 1.78  | 4  | 4 |
| rs633372    | 19 | 49209226  | a | g | 5.08  | 3.71E-07 | 1 | 0.007 | 0.815 | rs492602   | 10 | FUT2               | 18  | Jdownstream | 0.11  | 7  | 5 |
| rs629504    | 19 | 49223633  | c | g | -5.06 | 4.31E-07 | 1 | 0.006 | 0.822 | rs492602   | 10 | RASIP1             | 210 | jam_downs   | 11.56 | 4  | 4 |
| rs281377    | 19 | 49208603  | t | c | -5.05 | 4.43E-07 | 1 | 0.006 | 0.826 | rs492602   | 10 | FUT2               | 0   | exonic      | 15.71 | 5  | 4 |
| rs507855    | 19 | 49208501  | a | g | -5.04 | 4.72E-07 | 1 | 0.006 | 0.834 | rs492602   | 10 | FUT2               | 0   | UTR3        | 2.02  | 4  | 4 |
| rs546308    | 19 | 49223570  | a | g | 5.04  | 4.73E-07 | 1 | 0.006 | 0.840 | rs492602   | 10 | RASIP1             | 273 | jam_downs   | 5.58  | 2b | 4 |
| rs507711    | 19 | 49208564  | t | c | 5.04  | 4.77E-07 | 1 | 0.006 | 0.846 | rs492602   | 10 | FUT2               | 0   | UTR3        | 4.08  | 5  | 5 |
| rs507766    | 19 | 49208543  | t | c | -5.03 | 4.84E-07 | 1 | 0.006 | 0.857 | rs492602   | 10 | FUT2               | 0   | UTR3        | 1.8   |    |   |
